# Supplementary material
Source: HighWire-hosted journal article supplement (doi:10.1101/rna.071530.119)
Supplement: Supplemental_Information.docx [file Supplemental_Information.docx]

**Supplementary Information To**

**Pairing interactions between nucleobases and ligands in aptamer:ligand complexes of riboswitches: Crystal structure analysis, classification, optimal structures and accurate interaction energies**

**PREETHI S.P,1 and ABHIJIT MITRA1,* and PURSHOTAM SHARMA2,***

1Center for Computational Natural Sciences and Bioinformatics, International Institute of Information Technology Hyderabad (IIIT–H), Gachibowli, Hyderabad, Telangana, 500032, India.

2Computational Biochemistry Laboratory, Department of Chemistry and Centre for Advanced Studies in Chemistry, Panjab University, Chandigarh, 160014, India.

**Corresponding authors: abi_chem@iiit.ac.in, psharma@pu.ac.in,**





**Figure S1.** Chemical structures of the (2BP, 3AY, 6GO, 6GU, A2F, N6M, XAN, ADE, 29G, 29H, 5AZ, SAM, SAH, SFG and EEM) ligands considered in the present work for studying base:ligand pairing interactions.





**Figure S2.** Chemical structures of the (TPP, TPS, PYI, BFT, D2X and 2QB) ligands considered in the present work for studying base:ligand pairing interactions.





**Figure S3.** Chemical structures of the (FFO, THF, LYA, 6AP, H4B, FMN, RBF and RS3) ligands considered in the present work for studying base:ligand pairing interactions.





**Figure S4.** Chemical structures of the (5GP, DGP, GMP, PQ0, PRF, AMZ, C2E, LYS, GLY and G6P) ligands considered in the present work for studying base:ligand pairing interactions.





**Figure S5.** (A) D2X ligand bound to the aptamer domain of thiamine pyrophosphate riboswitch (PDB code: 3d2x). (B) Structures of different TPP–related ligands that bind to the aptamer domain of TPP riboswitch.





**Figure S6.** (A) FFO ligand bound to the aptamer domain of thiamine pyrophosphate riboswitch (PDB code: 4lvv). (B) Representation of different THF–related ligands that bind to the riboswitch aptamer.


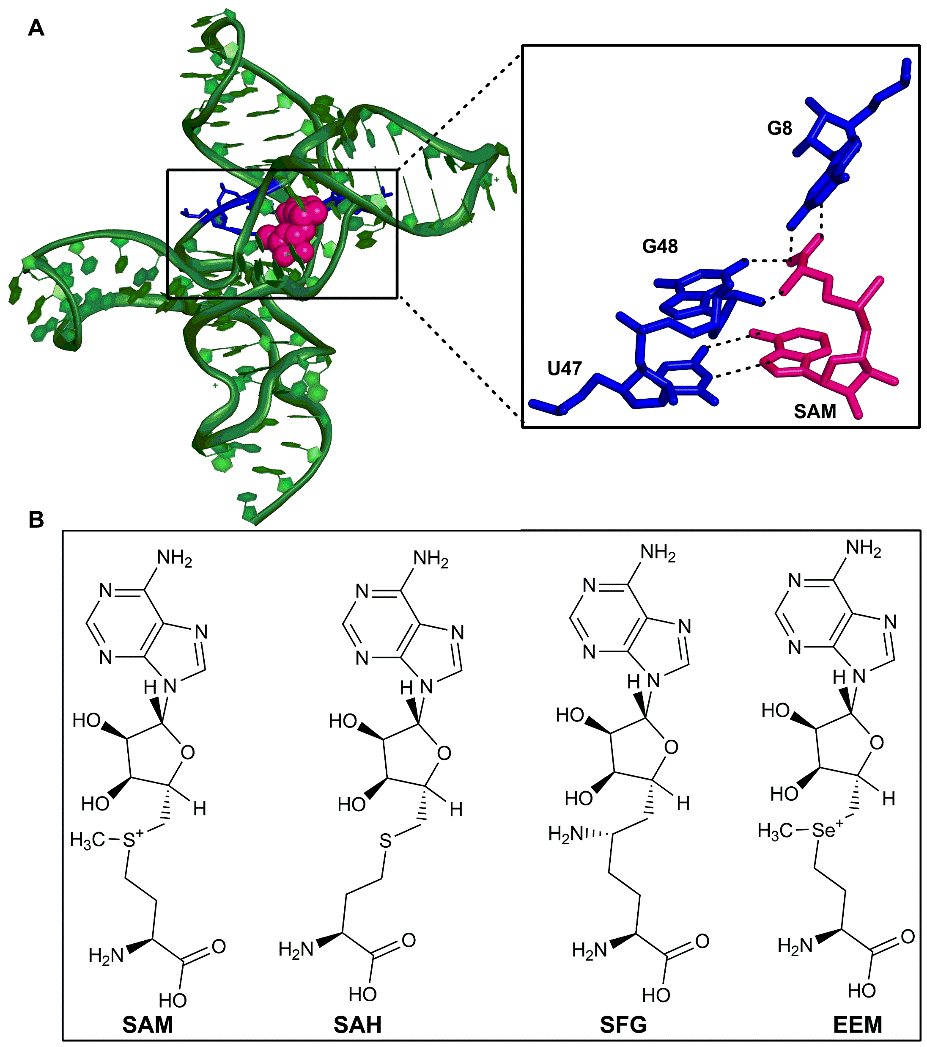


SAM riboswitch

**Figure S7.** (A) SAM ligand bound in the aptamer domain of SAM riboswitch (PDB code: 4l81). (B) Structures of different SAM–related ligands that bind to the riboswitch aptamer.


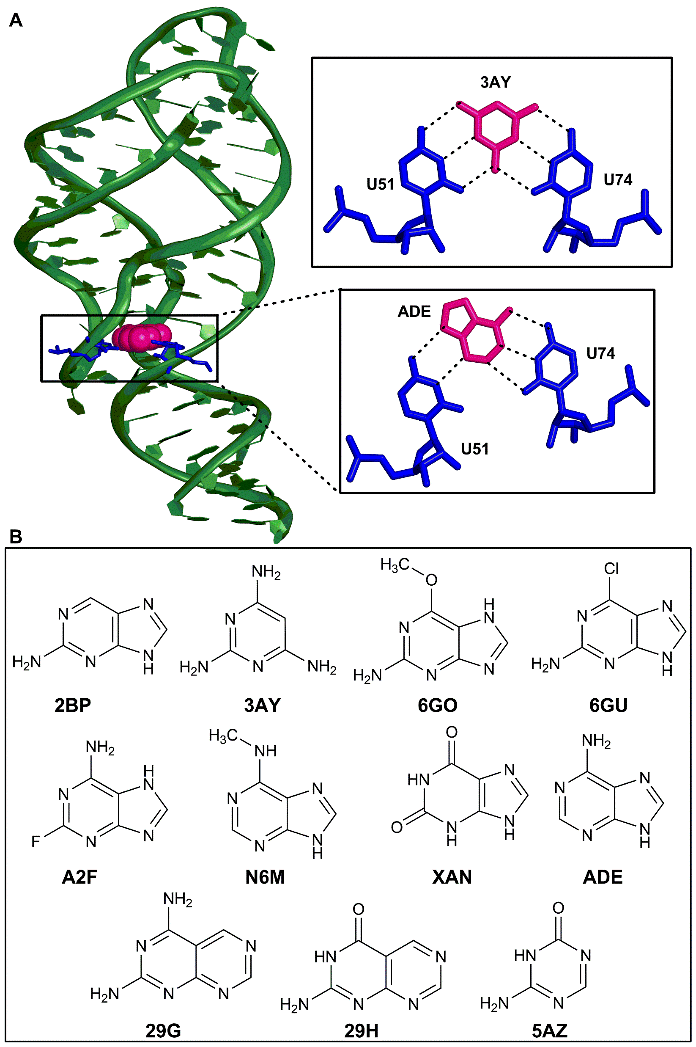


Purine riboswitch

**Figure S8.** (A) ADE ligand bound in the aptamer domain of ADE riboswitch (PDB code: 2g9c, 1y26). (B) Representation of different purine ligands that bind to the riboswitch aptamer.

**Table S1.** Hydrogen bonding properties (i.e. Donor-Acceptor distance (r(D–A), Acceptor-Hydrogen distance r(A–H) and D–H–A angle (∠D–H–A)) of the optimized B:B nucleobase:ligand pairs involving cWW pairing.

| Structure # | Pair | H–bond interaction | r(D–A) (Å) | r(A–H) (Å) | ∠D–H–A (°) |
| --- | --- | --- | --- | --- | --- |
| 1 | A:FMN | N6(A)–H…O(FMN) | 2.92 | 1.98 | 155.25 |
| N(FMN)–H…N1(A) | 3.00 | 2.02 | 162.79 |
| 2 | A:RBF | N6(A)–H…O(RBF) | 2.97 | 1.96 | 173.54 |
| N(RBF)–H…N1(A) | 2.84 | 1.79 | 179.15 |
| 3 | U:29G | N(29G)–H…O4(U) | 2.89 | 1.87 | 179.79 |
| N3(U)–H…N1(29G) | 2.93 | 1.88 | 179.65 |
| O2(U)–H…N(29G) | 2.95 | 1.94 | 179.53 |
| 4 | U:3AY | N(3AY)–H…O2(U) | 2.97 | 1.96 | 175.46 |
| N3(U)–H…N(3AY) | 2.88 | 1.82 | 179.56 |
| N(3AY)–H…O4(U) | 2.94 | 1.92 | 177.51 |
| 5 | U:3AY | N(3AY)–H…O4(U) | 2.93 | 1.91 | 179.20 |
| N3(U)–H…N(3AY) | 2.90 | 1.84 | 179.77 |
| N(3AY)–H…O2(U) | 2.95 | 1.94 | 176.26 |
| 6 | U:A2F | N6(A2F)–H…O4(U) | 2.86 | 1.83 | 179.33 |
| N3(U)–H…N1(A2F) | 3.00 | 1.97 | 172.03 |
| 7 | U:ADE | N6(ADE)–H…O4(U) | 2.93 | 1.92 | 174.36 |
| N3(U)–H…N1(ADE) | 2.84 | 1.79 | 179.74 |
| 8 | U:N6M | N6(N6M)–H…O4(U) | 2.96 | 1.94 | 177.40 |
| N3(U)–H…N1(N6M) | 2.84 | 1.79 | 179.71 |
| 9 | C:29H | N2(29H)–H…O2(C) | 2.91 | 1.89 | 178.55 |
| N1(29H)–H…N3(C) | 2.90 | 1.86 | 177.42 |
| N4(C)–H…O6(29H) | 2.84 | 1.81 | 178.86 |
| 10 | C:2BP | N2(2BP)–H…N3(C) | 2.96 | 1.94 | 177.08 |
| N4(C)–H…N1(2BP) | 2.98 | 1.94 | 179.36 |
| 11 | C:5AZ | N2(5AZ)–H…O2(C) | 2.93 | 1.91 | 175.82 |
| N1(5AZ)–H…N3(C) | 2.86 | 1.82 | 178.81 |
| N4(C)–H…O6(5AZ) | 2.80 | 1.77 | 179.44 |
| 12 | C:5GP | N2(5GP)–H…O2(C) | 2.89 | 1.89 | 176.95 |
| N1(5GP)–H…N3(C) | 2.97 | 1.90 | 175.87 |
| N4(C)–H…O6(5GP) | 2.82 | 1.80 | 175.92 |
| 13 | C:6GO | N2(6GO)–H…N3(C) | 3.01 | 2.02 | 163.25 |
| N4(C)–H…N1(6GO) | 3.09 | 2.06 | 179.26 |
| 14 | C:6GU | N2(6GU)–H…N3(C) | 2.94 | 1.92 | 177.85 |
| N4(C)–H…N1(6GU) | 3.03 | 2.01 | 176.95 |
| 15 | C:C2E | N2(C2E)–H…O2(C) | 2.84 | 1.81 | 179.91 |
| N1(C2E)–H…N3(C) | 2.88 | 1.85 | 176.57 |
| N4(C)–H…O6(C2E) | 2.84 | 1.81 | 174.55 |
| 16 | C:DGP | N2(DGP)–H…O2(C) | 2.91 | 1.89 | 179.10 |
| N1(DGP)–H…N3(C) | 2.92 | 1.88 | 177.16 |
| N4(C)–H…O6(DGP) | 2.80 | 1.77 | 179.38 |
| 17 | C:PQ0 | N2(PQ0)–H…O2(C) | 2.91 | 1.89 | 179.87 |
| N1(PQ0)–H…N3(C) | 2.91 | 1.88 | 177.99 |
| N4(C)–H…O6(PQ0) | 2.80 | 1.77 | 179.50 |
| 18 | C:PRF | N2(PRF)–H…O2(C) | 2.93 | 1.91 | 178.30 |
| N1(PRF)–H…N3(C) | 2.93 | 1.90 | 177.62 |
| N4(C)–H…O6(PRF) | 2.80 | 1.76 | 179.26 |
| 19 | C:XAN | N4(C)–H…O6(XAN) | 2.85 | 1.82 | 176.40 |
| N1(XAN)–H…O2(C) | 2.96 | 1.93 | 171.49 |

**Table S2.** Hydrogen bonding properties (i.e. Donor-Acceptor distance (r(D–A), Acceptor-Hydrogen distance r(A–H) and D–H–A angle (∠D–H–A)) of the optimized B:B nucleobase:ligand pairs involving tWW pairing.

| Structure # | Pair | H–bond interaction | r(D–A) (Å) | r(A–H) (Å) | ∠D–H–A (°) |
| --- | --- | --- | --- | --- | --- |
| 20 | 1U:7DG | N3(U)–H…O6(7DG) | 2.82 | 1.77 | 176.92 |
| N1(7DG)–H…O4(U) | 2.79 | 1.76 | 176.37 |
| 21 | 2U:H4B | N3(U)–H…O6(H4B) | 2.75 | 1.70 | 178.62 |
| N1(H4B)–H…O4(U) | 2.81 | 1.79 | 174.34 |
| 22 | C:7DG | N2(7DG)–H…O2(C) | 2.87 | 1.98 | 144.83 |
| N1(7DG)–H…O2(C) | 2.82 | 1.88 | 150.50 |
| O2'(C)–H…O6(7DG) | 2.65 | 1.66 | 173.89 |
| 23 | C:FFO | N2(FFO)–H…N3(C) | 3.12 | 2.10 | 179.85 |
| N1(FFO)–H…O2(C) | 2.89 | 1.88 | 169.55 |
| 24 | C:H4B | N2(H4B)–H…N3(C) | 3.19 | 2.17 | 172.52 |
| N1(H4B)–H…O2(C) | 2.96 | 1.96 | 167.05 |
| 25 | 2C:PRF | N2(PRF)–H…N3(C) | 3.17 | 2.16 | 175.83 |
| N1(PRF)–H…O2(C) | 2.95 | 1.94 | 168.62 |
| 26 | C:THF | N2(THF)–H…N3(C) | 3.19 | 2.18 | 175.37 |
| N1(THF)–H…O2(C) | 2.96 | 1.96 | 167.82 |

**Table S3.** Hydrogen bonding properties (i.e. Donor-Acceptor distance (r(D–A), Acceptor-Hydrogen distance r(A–H) and D–H–A angle (∠D–H–A)) of the optimized B:B nucleobase:ligand pairs involving tWS pairing.

| Structure # | Pair | H–bond interaction | r(D–A) (Å) | r(A–H) (Å) | ∠D–H–A (°) |
| --- | --- | --- | --- | --- | --- |
| 27 | A:PQ0 | N6(A)–H…N3(PQ0) | 3.03 | 2.01 | 177.22 |
| N2(PQ0)–H…N1(A) | 2.95 | 1.92 | 176.65 |
| 28 | A:PRF | N6(A)–H…N3(PQ0) | 3.01 | 1.98 | 177.03 |
| N2(PQ0)–H…N1(A) | 2.98 | 1.95 | 178.14 |
| 29 | U:2BP | N2(2BP)–H…O2(U) | 3.07 | 2.06 | 170.50 |
| N3(U)–H…N3(2BP) | 2.82 | 1.77 | 179.77 |
| N9(2BP)–H…O4(U) | 2.92 | 1.94 | 159.17 |
| 30 | U:6GO | N2(6GO)–H…O2(U) | 2.93 | 1.92 | 174.02 |
| N3(U)–H…N3(6GO) | 2.96 | 1.92 | 171.45 |
| 31 | U:6GU | N2(6GU)–H…O2(U) | 3.08 | 2.08 | 170.47 |
| N3(U)–H…N3(6GU) | 2.82 | 1.77 | 179.34 |
| N9(6GU)–H…O4(U) | 2.90 | 1.92 | 160.33 |
| 32 | U:7DG | N2(7DG)–H…O2(U) | 2.86 | 1.84 | 176.71 |
| N3(U)–H…N3(7DG) | 2.99 | 1.96 | 168.85 |
| 33 | U:ADE | N3(U)–H…N3(ADE) | 2.86 | 1.82 | 176.58 |
| N9(ADE)–H…O4(U) | 2.84 | 1.84 | 161.88 |
| 34 | U:FFO | N2(FFO)–H…O2(U) | 2.91 | 1.89 | 179.25 |
| N3(U)–H…N3(FFO) | 2.92 | 1.87 | 178.92 |
| N9(FFO)–H…O4(U) | 2.94 | 1.92 | 175.95 |
| 35 | U:FFO | N2(FFO)–H…O4(U) | 2.88 | 1.86 | 179.36 |
| N3(U)–H…N3(FFO) | 2.91 | 1.87 | 179.76 |
| N9(FFO)–H…O2(U) | 2.96 | 1.94 | 176.71 |
| 36 | U:N6M | N3(U)–H…N3(N6M) | 2.85 | 1.81 | 176.65 |
| N9(N6M)–H…O4(U) | 2.83 | 1.84 | 163.05 |
| 37 | U:XAN | N3(U)–H…O(XAN) | 2.86 | 1.83 | 174.44 |
| N(XAN)–H…O4(U) | 2.76 | 1.73 | 178.59 |
| 38 | C:29G | N2(29G)–H…N3(C) | 2.93 | 1.90 | 174.60 |
| N4(C)–H…N3(29G) | 2.94 | 1.91 | 175.24 |
| 39 | C:29H | N2(29H)–H…N3(C) | 2.85 | 1.81 | 176.50 |
| N4(C)–H…N3(29H) | 2.96 | 1.93 | 172.68 |
| 40 | C:5AZ | N(5AZ)–H…N3(C) | 2.85 | 1.81 | 178.33 |
| N4(C)–H…N(5AZ) | 2.99 | 1.97 | 175.81 |
| 41 | C:5GP | N2(5GP)–H…N3(C) | 2.92 | 1.88 | 169.41 |
| N4(C)–H…N3(5GP) | 3.03 | 2.00 | 177.20 |
| 42 | C:GMP | N2(GMP)–H…N3(C) | 2.91 | 1.88 | 172.09 |
| N4(C)–H…N3(GMP) | 2.98 | 1.96 | 179.20 |

**Table S4.** Hydrogen bonding properties (i.e. Donor-Acceptor distance (r(D–A), Acceptor-Hydrogen distance r(A–H) and D–H–A angle (∠D–H–A)) of the optimized B:B nucleobase:ligand pairs involving cWH pairing.

| Structure # | Pair | H–bond interaction | r(D–A) (Å) | r(A–H) (Å) | ∠D–H–A (°) |
| --- | --- | --- | --- | --- | --- |
| 43 | U:SAM | N6(SAH)–H…O4(U) | 2.89 | 1.87 | 168.05 |
| N3(U)–H…N7(SAH) | 2.86 | 1.83 | 175.14 |
| 44 | U:SAM | N6(SAM)–H…O4(U) | 2.91 | 1.90 | 168.32 |
| N3(U)–H…N7(SAM) | 2.85 | 1.82 | 174.88 |
| 45 | U:SFG | N6(SFG)–H…O4(U) | 2.99 | 2.01 | 162.32 |
| N3(U)–H…N7(SFG) | 2.83 | 1.81 | 168.69 |
| 46 | U:SAH | N6(SAH)–H…O4(U) | 2.97 | 1.96 | 168.74 |
| N3(U)–H…N7(SAH) | 2.83 | 1.79 | 174.45 |

**Table S5.** Hydrogen bonding properties (i.e. Donor-Acceptor distance (r(D–A), Acceptor-Hydrogen distance r(A–H) and D–H–A angle (∠D–H–A)) of the optimized B:B nucleobase:ligand pairs involving tWH pairing.

| Structure # | Pair | H–bond interaction | r(D–A) (Å) | r(A–H) (Å) | ∠D–H–A (°) |
| --- | --- | --- | --- | --- | --- |
| 47 | G:C2E | N1(G)–H…N7(C2E) | 2.75 | 1.72 | 174.67 |
| N2(G)–H…O6(C2E) | 2.83 | 1.85 | 160.86 |
| 48 | U:6AP | N6(6AP)–H…O4(U) | 2.97 | 1.96 | 169.48 |
| N3(U)–H…N7(6AP) | 2.81 | 1.76 | 174.72 |
| 49 | U:SAM | N6(SAM)–H…O2(U) | 3.04 | 2.04 | 167.65 |
| N3(U)–H…N7(SAM) | 2.82 | 1.78 | 172.48 |

**Table S6.** Hydrogen bonding properties (i.e. Donor-Acceptor distance (r(D–A), Acceptor-Hydrogen distance r(A–H) and D–H–A angle (∠D–H–A)) of the optimized B:B nucleobase:ligand pairs involving cHS pairing.

| Structure # | Pair | H–bond interaction | r(D–A) (Å) | r(A–H) (Å) | ∠D–H–A (°) |
| --- | --- | --- | --- | --- | --- |
| 50 | U:PQ0 | N9(PQ0)–H…O4(U) | 2.86 | 1.83 | 175.18 |
| C5(U)–H…N3(PQ0) | 3.53 | 2.48 | 163.70 |

**Table S7.** Hydrogen bonding properties (i.e. Donor-Acceptor distance (r(D–A), Acceptor-Hydrogen distance r(A–H) and D–H–A angle (∠D–H–A)) of the optimized B:B nucleobase:ligand pairs involving cWS pairing.

| Structure # | Pair | H–bond interaction | r(D–A) (Å) | r(A–H) (Å) | ∠D–H–A (°) |
| --- | --- | --- | --- | --- | --- |
| 51 | U:H4B | N2(FFO)–H…O4(U) | 2.91 | 1.89 | 179.76 |
| N3(U)–H…N3(FFO) | 2.91 | 1.86 | 178.93 |
| N9(FFO)–H…O2(U) | 3.00 | 1.99 | 176.85 |
| 52 | U:LYA | N2(FFO)–H…O4(U) | 3.11 | 2.10 | 170.78 |
| N3(U)–H…N3(FFO) | 3.00 | 1.99 | 165.75 |
| N9(FFO)–H…O2(U) | 3.03 | 2.07 | 155.38 |
| 53 | U:PRF | N2(FFO)–H…O4(U) | 2.96 | 1.94 | 175.96 |
| N3(U)–H…N3(FFO) | 2.82 | 1.77 | 179.65 |
| N9(FFO)–H…O2(U) | 2.97 | 1.98 | 164.35 |
| 54 | U:THF | N2(THF)–H…O4(U) | 2.92 | 1.89 | 178.76 |
| N3(U)–H…N3(THF) | 2.91 | 1.86 | 178.66 |
| N9(THF)–H…O2(U) | 2.99 | 1.97 | 178.66 |

**Table S8.** Hydrogen bonding properties (i.e. Donor-Acceptor distance (r(D–A), Acceptor-Hydrogen distance r(A–H) and D–H–A angle (∠D–H–A)) of the optimized B:B nucleobase:ligand pairs involving cSW pairing.

| Structure # | Pair | H–bond interaction | r(D–A) (Å) | r(A–H) (Å) | ∠D–H–A (°) |
| --- | --- | --- | --- | --- | --- |
| 55 | A:SAH | N6(SAH)–H…N3(A) | 3.31 | 2.34 | 156.60 |
| O2'(A)–H…N1(SAH) | 3.02 | 2.06 | 165.21 |
| 56 | A:SAM | N6(SAH)–H…N3(A) | 2.88 | 1.88 | 159.57 |
| O2'(A)–H…N1(SAM) | 2.83 | 1.87 | 165.70 |
| 57 | A:SFG | N6(SFG)–H…N3(A) | 2.99 | 2.01 | 159.35 |
| O2'(A)–H…N1(SFG) | 2.75 | 1.77 | 170.49 |

**Table S9.** Hydrogen bonding properties (i.e. Donor-Acceptor distance (r(D–A), Acceptor-Hydrogen distance r(A–H) and D–H–A angle (∠D–H–A)) of the optimized B:B nucleobase:ligand pairs involving tSW pairing.

| Structure # | Pair | H–bond interaction | r(D–A) (Å) | r(A–H) (Å) | ∠D–H–A (°) |
| --- | --- | --- | --- | --- | --- |
| 58 | G:2QB | N2(G)–H…N(2QB) | 3.06 | 2.04 | 174.19 |
| N(2QB)–H…N3(G) | 3.02 | 2.00 | 168.72 |
| O2'(G)–H…N(2QB) | 3.09 | 2.15 | 161.48 |
| 59 | G:BFT | N2(G)–H…N(BFT) | 3.01 | 1.99 | 170.35 |
| N(BFT)–H…N3(G) | 3.04 | 2.02 | 177.13 |
| 60 | G:D2X | N2(G)–H…N(D2X) | 3.30 | 2.31 | 166.64 |
| O(D2X)–H…N3(G) | 3.31 | 2.33 | 170.30 |
| 61 | G:EEM | N2(G)–H…N1(EEM) | 3.11 | 2.11 | 168.66 |
| N6(EEM)–H…N3(G) | 2.97 | 1.95 | 175.31 |
| N6(EEM)–H…O2'(G) | 3.01 | 2.10 | 147.33 |
| 62 | G:SAM | N2(G)–H…N1(SAM) | 3.10 | 2.08 | 174.83 |
| N6(SAM)–H…N3(G) | 2.98 | 1.95 | 175.83 |
| N6(SAM)–H… O2'(G) | 3.00 | 2.10 | 147.45 |
| 63 | G:TPP | N2(G)–H…N(TPP) | 2.93 | 1.90 | 174.01 |
| N(TPP)–H…N3(G) | 3.09 | 2.08 | 166.60 |
| 64 | G:TPS | N2(G)–H…N(TPS) | 3.09 | 2.09 | 166.28 |
| N(TPS)–H…N3(G) | 2.93 | 1.90 | 172.76 |

**Table S10.** Hydrogen bonding properties (i.e. Donor-Acceptor distance (r(D–A), Acceptor-Hydrogen distance r(A–H) and D–H–A angle (∠D–H–A)) of the optimized B:A, B:S, B:Ph and B:O base:ligand pairs.

| Structure # | Pair | Pairing type | Base edge | H–bond interaction | r(D–A) (Å) | r(A–H) (Å) | ∠D–H–A (°) |
| --- | --- | --- | --- | --- | --- | --- | --- |
| 65 | A:SAM | B:A | W | N6(A)–H…O(SAM) | 2.98 | 1.97 | 174.02 |
| N(SAM)–H…N1(A) | 3.13 | 2.13 | 164.73 |
| 66 | G:SAH | B:A | W | N1(G)–H…O(SAH) | 2.88 | 1.89 | 169.43 |
| N2(G)–H…O(SAH) | 2.77 | 1.79 | 164.84 |
| 67 | G:LYS | B:A | S | N2(G)–H…O(LYS) | 2.99 | 1.98 | 170.01 |
| N(LYS)–H…N3(G) | 3.14 | 2.29 | 141.50 |
| N(LYS)–H…O2'(G) | 3.14 | 2.38 | 130.77 |
| O2'(G)–H…N(LYS) | 2.94 | 1.95 | 175.19 |
| 68 | G:SAM | B:A | S | N2(G)–H…O(SAM) | 2.83 | 1.81 | 174.04 |
| N(SAM)–H…N3(G) | 2.86 | 1.83 | 160.90 |
| N(SAM)–H… O2'(G) | 2.89 | 1.88 | 165.15 |
| N6(SAM)–H… O4'(G) | 3.03 | 2.10 | 150.93 |
| 69 | G:SFG | B:A | S | N2(G)–H…N(SFG) | 2.96 | 1.98 | 157.05 |
| N(SFG)–H…N3(G) | 3.08 | 2.29 | 133.84 |
| C(SFG)–H…O2'(G) | 3.57 | 2.71 | 134.86 |
| 70 | U:GLY | B:A | W | N(GLY)–H…O2(U) | 3.17 | 2.17 | 168.80 |
| N3(U)–H…O(GLY) | 2.90 | 1.88 | 171.09 |
| 71 | G:SAM | B:A | W | N1(G)–H…O(SAM) | 3.01 | 1.99 | 179.72 |
| N2(G)–H…O(SAM) | 3.57 | 2.69 | 145.57 |
| 72 | G:SAM | B:A | S | N2(G)–H…O(SAM) | 3.19 | 2.18 | 169.90 |
| O2'(G)–H…N7(SAM) | 2.83 | 1.88 | 161.96 |
| O(SAM)–H… O3'(G) | 2.69 | 1.77 | 152.19 |
| 73 | G:SFG | B:A | W | N1(G)–H…O(SFG) | 3.46 | 2.51 | 156.08 |
| N2(G)–H…O(SFG) | 3.16 | 2.24 | 151.63 |
| 74 | G:D2X | B:Ph | W | OP(D2X)–H…O6(G) | 2.47 | 1.42 | 176.90 |
| N1(G)–H…OP(D2X) | 2.97 | 1.99 | 162.84 |
| 75 | G:G6P | B:Ph | W | N2(G)–H…OP(G6P) | 3.07 | 2.29 | 138.83 |
| N1(G)–H…OP(G6P) | 2.71 | 1.91 | 135.41 |
| OP(G6P)–H…O6(G) | 2.7 | 1.8 | 148.00 |
| 76 | G:PYI | B:Ph | W | OP(PYI)–H…O6(G) | 2.62 | 1.63 | 166.66 |
| OP(PYI)–H…O6(G) | 2.61 | 1.65 | 158.42 |
| N1(G)–H…OP(PYI) | 2.85 | 1.84 | 167.70 |
| 77 | G:RS3 | B:S | W | O2'(RS3)–H…O6(G) | 2.88 | 1.87 | 164.95 |
| N1(G)–H…O5'(RS3) | 2.68 | 1.71 | 168.37 |
| 78 | G:RS3 | B:S | S | N2(G)–H…O5'(RS3) | 3.01 | 2.03 | 161.02 |
| O2'(G)–H…O4'(RS3) | 3.13 | 2.32 | 140.74 |
| 79 | A:PRF | B:O | S | C(PRF)–H…N3(A) | 3.42 | 2.53 | 139.37 |
| C(PRF)–H…O2'(A) | 3.37 | 2.32 | 160.57 |
| N(PRF)–H…O3'(A) | 3.47 | 2.96 | 111.75 |
| 80 | U:AMZ | B:O | W | N(AMZ)–H…O2(U) | 3.09 | 2.11 | 161.35 |
| N3(U)–H…N(AMZ) | 2.82 | 1.77 | 174.60 |
| O5'(AMZ)–H…O4(U) | 2.87 | 1.94 | 159.29 |

**Table S11. Cartesian coordinates of the optimized geometries of base:ligand complexes.**

**Structure #1.** Optimized geometry coordinates of A:FMN (W–edge)

Energy: –1484281.9377768 (au)

N 8.53035 0.25639 0.12226

C 8.96892 –1.00444 –0.23031

N 7.99501 –1.86598 –0.39634

C 6.85144 –1.12980 –0.13880

C 5.47992 –1.47342 –0.14815

N 5.03653 –2.70777 –0.43956

N 4.59209 –0.49906 0.15590

C 5.03498 0.74072 0.44982

N 6.29263 1.17547 0.49017

C 7.15655 0.19499 0.18636

N –0.37156 0.01465 0.70323

C 1.00821 0.18602 0.60159

O 1.52495 1.27516 0.79718

N 1.79218 –0.92227 0.26425

C 1.33641 –2.16962 –0.07461

O 2.07921 –3.09041 –0.39899

C –0.15278 –2.31808 –0.00829

N –0.69591 –3.45613 –0.33153

C –2.05602 –3.56228 –0.25537

C –2.65678 –4.77555 –0.65532

C –4.02366 –4.96834 –0.60061

C –4.63548 –6.27625 –1.03595

C –4.84156 –3.89574 –0.13662

C –6.34029 –4.04864 –0.09455

C –4.26751 –2.69456 0.26779

C –2.87695 –2.50516 0.22672

N –2.25452 –1.32933 0.64959

C –0.90324 –1.16139 0.44779

C –2.97683 –0.34886 1.49954

C –3.71263 0.82679 0.79890

O –4.42613 0.36779 –0.33794

C –2.87774 2.05940 0.41133

O –1.99020 1.73143 –0.66475

C –2.18204 2.76631 1.59598

O –3.18788 3.26159 2.47646

C –1.23047 3.87363 1.15520

O –1.97402 4.83736 0.37207

P –1.46983 5.17557 –1.14157

O –2.42006 6.42011 –1.51027

O –2.11405 4.03925 –2.05837

O –0.01511 5.42267 –1.24804

H 10.02167 –1.22272 –0.34874

H 5.70755 –3.41923 –0.67897

H 4.25196 1.45976 0.67850

H –1.99030 –5.55471 –1.01082

H –3.86451 –6.98231 –1.35212

H –5.20747 –6.74347 –0.22598

H –5.32809 –6.13825 –1.87442

H –6.63672 –4.87386 0.56362

H –6.82400 –3.13816 0.26469

H –6.74479 –4.27803 –1.08714

H –4.91259 –1.87242 0.54570

H –3.71663 –0.93086 2.05005

H –2.24764 0.03168 2.21588

H –4.45137 1.17553 1.52845

H –3.80587 0.43661 –1.08178

H –3.59090 2.77213 –0.01624

H –1.24110 1.22587 –0.25870

H –1.58623 2.05461 2.17608

H –3.54801 4.05826 2.05733

H –0.85588 4.39106 2.04272

H –0.37212 3.47750 0.60710

H 4.03836 –2.91156 –0.45340

H 2.83109 –0.75958 0.21898

H 9.09197 1.07578 0.29851

H –1.93445 3.13343 –1.70475

H –1.88259 7.22364 –1.55017

**Structure #2.** Optimized geometry coordinates of A:RBF (W–edge)

Energy: –1128023.6605379 (au)

N 8.37721 –0.11907 0.08206

C 8.67241 1.22556 0.18896

N 7.60941 1.99248 0.18895

C 6.55566 1.10196 0.07569

C 5.15512 1.29113 0.02104

N 4.57654 2.50215 0.07335

N 4.38220 0.18649 –0.09188

C 4.95996 –1.03039 –0.14556

N 6.25747 –1.32756 –0.10320

C 7.00604 –0.21953 0.00764

N –0.51350 –0.94562 –0.40156

C 0.87555 –0.94858 –0.32091

O 1.51345 –1.99115 –0.32663

N 1.54155 0.28010 –0.22435

C 0.96014 1.51368 –0.09978

O 1.60514 2.55111 0.02102

C –0.53637 1.48926 –0.12551

N –1.19124 2.60609 0.00971

C –2.55611 2.55649 –0.01840

C –3.27377 3.75701 0.17342

C –4.65429 3.79566 0.15261

C –5.39223 5.09448 0.36059

C –5.36276 2.57527 –0.05607

C –6.87002 2.56303 –0.04996

C –4.67281 1.38380 –0.25257

C –3.26864 1.34709 –0.24763

N –2.53497 0.18266 –0.47249

C –1.16548 0.19389 –0.32551

C –3.18466 –1.02372 –1.03887

C –3.76488 –2.06356 –0.03370

O –4.36984 –1.40889 1.07011

C –2.80396 –3.14365 0.49409

O –1.86260 –2.57530 1.40176

C –2.17072 –4.04319 –0.59169

O –3.19146 –4.88930 –1.12154

C –1.00387 –4.86024 –0.03116

O –1.40601 –5.58242 1.13285

H 9.69347 1.57469 0.26329

H 5.16251 3.31452 0.17581

H 4.26195 –1.85968 –0.23325

H –2.68597 4.65406 0.33936

H –4.69366 5.92225 0.50097

H –6.03250 5.33659 –0.49566

H –6.04383 5.05216 1.24119

H –7.26715 2.93184 0.90287

H –7.27626 3.21410 –0.83298

H –7.26069 1.55616 –0.21037

H –5.23366 0.46379 –0.33742

H –3.99900 –0.65165 –1.66145

H –2.44809 –1.49077 –1.69269

H –4.55549 –2.58856 –0.58190

H –3.42945 –3.80090 1.10924

H –1.79405 –3.45217 –1.43328

H –3.30382 –5.59479 –0.46513

H –0.71571 –5.60420 –0.78039

H –0.13814 –4.21584 0.15939

H –1.41171 –4.93333 1.85177

H 2.58958 0.23610 –0.18276

H 3.56121 2.59387 0.05729

H –3.66330 –1.34225 1.73487

H 9.02617 –0.89123 0.06214

H –1.21049 –2.09393 0.84410

**Structure #3.** Optimized geometry coordinates of U:29G (W–edge)

Energy: –612236.6908763 (au)

N –4.63688 0.83507 –0.01131

C –3.26128 1.06500 –0.00506

O –2.79497 2.22211 –0.00668

N –2.49671 –0.08230 0.00291

C –2.97203 –1.39932 0.00541

O –2.18188 –2.35914 0.01263

C –4.42378 –1.53103 –0.00105

C –5.19365 –0.42118 –0.00919

N 0.68978 –2.00324 0.00202

C 1.23276 –0.77254 0.00315

N 0.41416 0.28202 0.00749

C 2.66718 –0.58403 –0.00068

C 3.63868 –1.59345 –0.00454

N 4.94188 –1.34731 –0.00831

C 5.27144 –0.03072 –0.00823

N 4.47297 1.01731 –0.00459

C 3.13268 0.76587 –0.00044

N 2.29659 1.81732 0.00380

C 0.99283 1.52952 0.00795

N 0.14182 2.57466 0.01367

H –4.84807 –2.52487 0.00062

H –6.27735 –0.45322 –0.01449

H 1.27421 –2.82087 –0.00015

H 3.35808 –2.64803 –0.00452

H 0.54968 3.49502 0.01051

H –1.45839 0.05415 0.00611

H –5.20903 1.66708 –0.01691

H –0.32399 –2.12888 0.00701

H –0.86518 2.45466 0.01222

H 6.34061 0.17767 –0.01158

**Structure #4.** Optimized geometry coordinates of U:3AY (W–edge)

Energy: –530438.8046776 (au)

N –3.79810 –1.17966 –0.12333

C –2.40580 –1.21077 –0.14143

O –1.80412 –2.27190 –0.26992

N –1.80613 0.01817 –0.00630

C –2.46192 1.24523 0.14103

O –1.82656 2.29356 0.24502

C –3.91800 1.17216 0.15737

C –4.52651 –0.02495 0.02414

N 1.06422 2.33644 –0.29439

C 1.78274 1.19237 –0.12813

C 3.18534 1.20472 –0.10984

N 1.07947 0.03992 –0.01462

C 1.80685 –1.09371 0.11180

N 1.12040 –2.25638 0.26279

N 3.14615 –1.19032 0.12468

C 3.82039 –0.03343 0.02059

N 5.19159 –0.13729 0.08906

H –4.47464 2.09135 0.27211

H –5.60398 –0.14621 0.02442

H 0.06781 2.33224 –0.08161

H 3.74263 2.13133 –0.18910

H 1.66840 –3.09913 0.21091

H 5.54454 –1.07227 –0.05581

H –4.24491 –2.07993 –0.21889

H –0.75087 0.02703 –0.01391

H 0.12996 –2.29972 0.04364

H 5.73711 0.60299 –0.32475

H 1.54772 3.21306 –0.18614

**Structure #5.** Optimized geometry coordinates of U:3AY (W–edge)

Energy: –530438.6992134 (au)

N 3.80496 –1.18561 0.05799

C 2.41316 –1.21547 0.06830

O 1.81044 –2.28158 0.13595

N 1.81337 0.01941 –0.00324

C 2.47180 1.25101 –0.09029

O 1.84095 2.30533 –0.15110

C 3.92797 1.17663 –0.10126

C 4.53538 –0.02594 –0.02630

N –5.20214 –0.13787 –0.01023

C –3.82731 –0.03072 –0.01953

C –3.19056 1.20987 0.06500

N –3.15667 –1.19209 –0.07454

C –1.81647 –1.10022 –0.03545

N –1.13746 –2.27063 –0.09807

N –1.08516 0.03643 0.04124

C –1.78743 1.19438 0.09723

N –1.07023 2.34198 0.21148

H 4.48524 2.10022 –0.16703

H 5.61271 –0.14797 –0.02732

H –5.54627 –1.03589 –0.31965

H –3.74612 2.13868 0.12893

H –0.12926 –2.30972 0.00987

H –0.06123 2.32657 0.07884

H 4.24989 –2.09043 0.10948

H 0.75882 0.02493 0.01281

H –1.68399 –3.11474 –0.08887

H –5.73023 0.65933 –0.33126

H –1.54661 3.22046 0.09670

**Structure #6.** Optimized geometry coordinates of U:A2F (W–edge)

Energy: –615843.2608912 (au)

N –4.46258 0.82617 0.07149

C –3.09382 1.11656 0.13689

O –2.68482 2.25232 0.26884

N –2.28879 –0.00844 0.03793

C –2.71187 –1.32901 –0.10331

O –1.89978 –2.25684 –0.16901

C –4.15370 –1.51458 –0.16402

C –4.96673 –0.43885 –0.07461

F 0.39662 2.42592 –0.15238

C 1.27695 1.42592 –0.08693

N 2.54040 1.76518 –0.14839

N 0.70005 0.22207 0.02468

C 1.50157 –0.86031 0.09430

N 0.92634 –2.07793 0.22800

C 2.89017 –0.62485 0.05897

C 3.35818 0.69383 –0.07065

N 4.03236 –1.41049 0.10436

C 5.08943 –0.54180 0.01155

N 4.73678 0.71750 –0.10028

H –4.53700 –2.51850 –0.27679

H –6.04809 –0.51334 –0.11112

H –0.08840 –2.15035 0.09013

H 4.09690 –2.40548 0.25034

H 6.11067 –0.89966 0.03105

H –5.06663 1.63233 0.14036

H –1.26799 0.16132 0.06027

H 1.47479 –2.90322 0.05092

**Structure #7.** Optimized geometry coordinates of U:ADE (W–edge)

Energy: –553578.6066158 (au)

N 4.27424 –1.07711 –0.00225

C 2.88630 –1.24861 –0.00028

O 2.37514 –2.35649 0.00033

N 2.18210 –0.06293 0.00069

C 2.70961 1.22671 0.00133

O 1.96988 2.21402 0.00316

C 4.16513 1.29630 –0.00050

C 4.88380 0.15215 –0.00192

N –4.62933 –0.80663 –0.00029

C –4.99301 0.52542 –0.00136

N –3.96883 1.34340 –0.00156

C –2.86962 0.50201 –0.00057

C –1.47826 0.75865 –0.00010

N –0.95908 1.99612 –0.00084

N –0.64955 –0.31165 0.00098

C –1.16579 –1.55641 0.00155

N –2.44816 –1.91620 0.00126

C –3.25286 –0.84211 0.00021

H 4.63462 2.26970 –0.00047

H 5.96821 0.13783 –0.00318

H –5.23919 –1.61023 0.00010

H –6.03191 0.82654 –0.00197

H –1.58662 2.78360 –0.00085

H –0.42629 –2.35405 0.00229

H 0.05327 2.13580 0.00049

H 1.13673 –0.15614 0.00127

H 4.80951 –1.93303 –0.00177

**Structure #8.** Optimized geometry coordinates of U:N6M (W–edge)

Energy: –578244.6719088 (au)

N 4.41533 –1.11718 0.00384

C 3.03275 –1.32778 –0.00157

O 2.55395 –2.45022 –0.00406

N 2.29599 –0.16263 –0.00361

C 2.78737 1.14129 0.00057

O 2.01734 2.10486 –0.00047

C 4.24031 1.25237 0.00626

C 4.99050 0.12863 0.00768

C –1.43016 0.55326 –0.01454

C –2.80655 0.19341 –0.00372

C –3.08085 –1.18219 0.00646

C –0.95309 –1.74616 0.00023

C –4.93455 0.02524 0.00116

C –1.69059 3.03633 0.02351

N –0.92999 1.79941 –0.03873

N –0.53309 –0.47071 –0.01010

N –2.20624 –2.19812 0.00912

N –4.45399 –1.26652 0.01006

N –3.98592 0.92750 –0.00719

H 4.68223 2.23858 0.00928

H 6.07490 0.14427 0.01188

H –0.15718 –2.48805 0.00200

H –5.99528 0.23630 0.00192

H –2.74157 2.84436 –0.18634

H –1.61270 3.49938 1.01572

H –1.29678 3.74303 –0.71357

H –4.98640 –2.12326 0.01766

H 4.97422 –1.95787 0.00554

H 1.25246 –0.27663 –0.00788

H 0.09030 1.87403 –0.01984

**Structure #9.** Optimized geometry coordinates of C:29H (W–edge)

Energy: –612238.7622669 (au)

N –4.58971 0.84817 –0.00258

C –3.19254 1.03112 –0.00051

O –2.75252 2.18423 –0.00061

N –2.42066 –0.08915 0.00147

C –2.96957 –1.30988 0.00112

N –2.14450 –2.36283 0.00306

C –4.39985 –1.50017 –0.00120

C –5.16896 –0.38288 –0.00300

N 0.45045 0.32048 0.00192

C 1.20607 –0.83625 0.00085

O 0.66862 –1.95422 0.00084

C 2.64011 –0.59394 –0.00018

C 3.58211 –1.62617 –0.00099

N 4.89300 –1.40008 –0.00193

C 5.24146 –0.09263 –0.00204

N 4.45918 0.97461 –0.00131

C 3.12085 0.74569 –0.00031

N 2.30005 1.82797 0.00050

C 1.00280 1.58711 0.00159

N 0.13063 2.60891 0.00280

H –1.12140 –2.22702 0.00453

H –4.84125 –2.48810 –0.00148

H –6.25292 –0.40993 –0.00478

H 3.24357 –2.66042 –0.00086

H 0.52949 3.53369 0.00157

H 6.31322 0.10250 –0.00284

H –0.58090 0.20440 0.00231

H –0.88422 2.47918 0.00170

H –2.51744 –3.29793 0.00260

H –5.14093 1.69519 –0.00409

**Structure #10.** Optimized geometry coordinates of C:2BP (W–edge)

Energy: –541098.3482327 (au)

N 4.87960 –0.50210 –0.00040

C 3.59018 –1.10450 0.00057

O 3.51141 –2.32449 0.00120

N 2.52280 –0.24685 0.00069

C 2.69704 1.07279 0.00004

N 1.59676 1.84527 0.00030

C 4.00603 1.68309 –0.00082

C 5.07118 0.84200 –0.00098

N –4.82686 –0.93726 –0.00083

C –5.51626 0.26901 –0.00014

N –4.74115 1.31893 0.00053

C –3.45508 0.78893 0.00037

C –2.18079 1.34593 0.00084

N –1.09487 0.57120 0.00056

C –1.26168 –0.79188 –0.00017

N –0.14426 –1.53890 –0.00048

N –2.44969 –1.44445 –0.00069

C –3.48804 –0.62347 –0.00041

H 1.68329 2.84756 –0.00063

H 4.13480 2.75766 –0.00132

H 6.09895 1.18956 –0.00162

H –5.21683 –1.86737 –0.00087

H –6.59806 0.29246 –0.00028

H –2.02661 2.42358 0.00144

H 0.79189 –1.11977 0.00054

H 5.65505 –1.14957 –0.00028

H 0.66211 1.40926 0.00054

H –0.24764 –2.53980 –0.00061

**Structure #11.** Optimized geometry coordinates of C:5AZ (W–edge)

Energy: –505760.2264373 (au)

N 3.40582 –1.18700 –0.00005

C 1.99664 –1.19077 –0.00040

O 1.41197 –2.27892 –0.00072

N 1.37606 0.01773 –0.00036

C 2.07154 1.16253 –0.00008

N 1.38220 2.30680 0.00004

C 3.51513 1.16825 0.00004

C 4.13564 –0.03782 0.00000

C –2.12085 1.25514 0.00018

N –1.48925 0.00207 0.00059

C –2.19534 –1.15834 0.00049

N –3.53012 –1.15836 –0.00021

C –4.07719 0.07373 –0.00086

N –3.49063 1.25616 –0.00075

N –1.51604 –2.31316 0.00125

O –1.42444 2.27784 0.00063

H 1.86876 3.18841 0.00061

H 4.07953 2.09153 0.00012

H 5.21433 –0.14821 0.00009

H –5.16758 0.08523 –0.00168

H –0.49253 –2.34803 0.00108

H –2.06257 –3.15900 0.00035

H –0.45072 –0.01117 0.00050

H 0.34447 2.30005 0.00016

H 3.84631 –2.09639 –0.00030

**Structure #12.** Optimized geometry coordinates of C:5GP (W–edge)

Energy: –1255944.4350053 (au)

N 6.04557 –2.55961 –0.94998

C 5.75996 –1.18045 –0.76377

O 6.63283 –0.35435 –0.98877

N 4.49191 –0.88219 –0.33611

C 3.58345 –1.83477 –0.12673

N 2.36672 –1.45420 0.30352

C 3.87577 –3.23364 –0.32713

C 5.13070 –3.54241 –0.74413

P –4.76666 –1.00038 –1.86375

O –4.97819 0.56214 –1.47544

O –6.01340 –1.77971 –1.94431

O –3.83144 –0.87088 –3.17117

O –3.71391 –1.58392 –0.80697

C –2.42511 –0.97312 –0.60432

C –1.91640 –1.46224 0.74797

O –0.53350 –1.05266 0.89587

C –2.68172 –0.89722 1.98069

O –3.45797 –1.84043 2.67143

C –1.53201 –0.32993 2.86258

O –1.06642 –1.35240 3.74202

C –0.44031 0.01599 1.84673

N –0.56536 1.33478 1.25019

C –1.62804 2.24803 1.27229

N –1.34983 3.37576 0.67920

C –0.04839 3.23048 0.23654

C 0.81563 4.15884 –0.45325

O 0.61661 5.29428 –0.84595

N 2.11382 3.56603 –0.64446

C 2.51696 2.30290 –0.27471

N 3.78072 1.93142 –0.52627

N 1.67455 1.46531 0.31746

C 0.45346 1.97904 0.57231

H 2.13740 –0.45447 0.32935

H 3.13315 –4.00137 –0.15405

H 5.45858 –4.56009 –0.92739

H –2.51026 0.11834 –0.61759

H –1.74392 –1.28392 –1.40118

H –1.95095 –2.55607 0.76915

H –3.35482 –0.09571 1.65651

H –2.89045 –2.17872 3.38467

H –1.83509 0.50347 3.49762

H –0.53628 –1.97205 3.21750

H 0.55980 –0.04745 2.28064

H –2.56651 2.01714 1.75432

H 4.38602 2.51592 –1.07934

H 6.98305 –2.76592 –1.26561

H 1.59241 –2.09809 0.31878

H 4.07331 0.95056 –0.37548

H 2.76992 4.19312 –1.09384

H –5.83661 0.67636 –1.04179

H –4.29607 –0.46206 –3.91515

**Structure #13.** Optimized geometry coordinates of C:6GO (W–edge)

Energy: –612964.5480213 (au)

N 5.11204 –0.52394 0.23892

C 3.85590 –1.03706 0.67687

O 3.84678 –2.03161 1.38380

N 2.74459 –0.35488 0.25142

C 2.85643 0.70423 –0.54120

N 1.71758 1.33367 –0.90094

C 4.12533 1.20711 –1.00948

C 5.23312 0.54868 –0.58225

C –0.93713 2.83643 0.93807

O –2.17394 2.20068 0.59431

C –2.13917 0.89651 0.24567

N –0.99861 0.24174 0.08900

C –3.35152 0.23475 0.05600

N –4.69450 0.56564 0.12058

C –5.37183 –0.58768 –0.17280

N –4.59757 –1.62274 –0.41240

C –3.31060 –1.13348 –0.27231

N –2.17220 –1.82847 –0.39430

C –1.06266 –1.10451 –0.20175

N 0.13204 –1.73577 –0.33197

H 1.73924 2.05589 –1.60147

H 4.19565 2.06899 –1.65986

H 6.23984 0.83892 –0.86482

H –0.31249 2.99180 0.05375

H –1.21654 3.80076 1.36456

H –0.37728 2.24267 1.66545

H –5.08657 1.46856 0.33528

H –6.45371 –0.60932 –0.19779

H 0.98197 –1.32082 0.05418

H 0.08242 –2.74040 –0.39756

H 0.81477 0.97149 –0.58304

H 5.91901 –1.03776 0.56331

**Structure #14.** Optimized geometry coordinates of C:6GU (W–edge)

Energy: –829500.2917551 (au)

N –5.11973 –0.55143 0.01086

C –3.85653 –1.20475 –0.00098

O –3.82419 –2.42711 –0.00476

N –2.75548 –0.39083 –0.00728

C –2.87566 0.93524 –0.00175

N –1.74511 1.66105 –0.00844

C –4.15844 1.59747 0.01057

C –5.25640 0.79963 0.01646

Cl 1.90033 2.60873 –0.00671

N 0.89749 0.17034 –0.01012

C 0.96516 –1.20354 –0.00856

N –0.20381 –1.86040 –0.01469

N 2.10633 –1.92994 –0.00172

C 3.19590 –1.17753 0.00346

C 3.26846 0.23597 0.00263

C 2.02184 0.85572 –0.00463

N 4.58327 0.67226 0.00932

C 5.28267 –0.42984 0.01402

N 4.50904 –1.58247 0.01093

H –1.77651 2.66645 –0.00251

H –4.24345 2.67626 0.01483

H –6.26921 1.18836 0.02568

H –1.10596 –1.36781 –0.01688

H 6.36319 –0.48115 0.01990

H 4.83000 –2.53880 0.01326

H –0.17902 –2.86656 –0.01173

H –0.83606 1.18793 –0.01491

H –5.92107 –1.16660 0.01520

**Structure #15.** Optimized geometry coordinates of C:C2E (E–edge)

Energy: –2167970.4510178 (au)

N 8.36566 0.09373 1.37392

C 7.02074 –0.26753 1.14856

O 6.28119 –0.54505 2.09986

N 6.55399 –0.30109 –0.12554

C 7.35241 0.00237 –1.14832

N 6.82827 –0.05369 –2.37733

C 8.72331 0.37027 –0.94775

C 9.17969 0.40424 0.31207

P –3.78426 –0.40333 –2.75174

O –5.00763 –1.05001 –3.87299

O –2.60713 0.57696 –3.64469

O –3.04390 –1.60690 –1.98350

C –3.82031 –2.64407 –1.38792

C –2.97983 –3.46410 –0.42293

O –1.90483 –4.12521 –1.11356

C –2.32846 –2.64293 0.68043

O –3.15457 –2.55212 1.84059

C –1.05923 –3.41585 0.96780

O –1.34060 –4.47827 1.88105

C –0.68540 –4.03829 –0.35778

N 0.30384 –3.19452 –1.09056

C 0.14398 –2.73717 –2.35363

N 1.21914 –2.00984 –2.75821

C 2.09381 –1.98269 –1.74303

C 3.42323 –1.38284 –1.51856

O 4.04160 –0.65067 –2.48651

N 4.01924 –1.58489 –0.32337

C 3.43204 –2.31219 0.66404

N 4.10023 –2.45477 1.83661

N 2.20237 –2.88817 0.51692

C 1.50025 –2.76356 –0.64591

P –2.92854 –1.39256 2.93730

O –3.98622 –1.63337 4.34467

O –1.22318 –1.28972 3.43416

O –3.35564 –0.04033 2.17868

C –4.67905 0.13378 1.68023

C –4.68232 1.28305 0.68454

O –4.17342 2.45979 1.31814

C –3.77705 1.03210 –0.51144

O –4.50430 0.45023 –1.58752

C –3.24438 2.40612 –0.85929

O –4.13609 3.06871 –1.75838

C –3.28925 3.16726 0.44265

N –1.93030 3.29388 1.04439

C –1.49992 2.72647 2.19576

N –0.20776 3.07208 2.45783

C 0.19978 3.87793 1.46044

C 1.44342 4.59399 1.11205

O 2.52991 4.50969 1.91032

N 1.47292 5.33421 –0.02194

C 0.38368 5.43172 –0.83921

N 0.45911 6.19097 –1.96419

N –0.78334 4.78960 –0.56824

C –0.93029 4.02140 0.53902

H 5.81375 –0.27587 –2.47374

H 9.36934 0.61533 –1.78112

H 10.20068 0.67446 0.55958

H –4.21989 –3.27179 –2.18808

H –4.66732 –2.22075 –0.83584

H –3.64088 –4.21638 0.02827

H –2.08931 –1.64297 0.30472

H –0.24869 –2.78704 1.34989

H –1.42955 –4.09441 2.76265

H –0.27118 –5.03948 –0.22341

H –0.73368 –2.94157 –2.94045

H 3.55131 –2.83554 2.59092

H –5.03346 –0.77637 1.18402

H –5.33627 0.34190 2.52841

H –5.71275 1.44800 0.34262

H –2.95399 0.37583 –0.21325

H –2.23054 2.37671 –1.27204

H –4.05785 2.63971 –2.62126

H –3.66797 4.17765 0.27089

H –2.12069 2.09062 2.80131

H –0.33745 6.06877 –2.57326

H 7.38039 0.18650 –3.18372

H 4.94191 –1.10998 –0.19676

H 4.84752 –1.78990 2.05264

H 2.34009 5.83395 –0.18232

H 1.35049 6.26136 –2.43438

H 8.68037 0.12314 2.33265

H –1.31833 –1.11056 4.38802

H –2.78431 0.27759 –4.55583

**Structure #16.** Optimized geometry coordinates of C:DGP (W–edge)

Energy: –1208769.4603988 (au)

N –7.03047 0.53853 –0.98348

C –5.68741 0.88395 –0.73054

O –5.27985 1.97651 –1.13774

N –4.93119 –0.01812 –0.05121

C –5.44184 –1.19027 0.34853

N –4.63593 –2.02792 1.00698

C –6.81608 –1.54867 0.08705

C –7.57116 –0.64518 –0.58519

P 3.01614 –2.50384 –0.60087

O 4.19082 –3.60381 –0.77974

O 2.46757 –2.84233 0.84734

O 2.07787 –2.43784 –1.74513

O 3.86143 –1.14317 –0.32924

C 4.34023 –0.35533 –1.43303

C 4.33203 1.12521 –1.06470

O 2.99724 1.64769 –1.06550

C 4.96134 1.46999 0.31158

O 6.30759 1.89898 0.23463

C 3.98169 2.51108 0.89426

C 2.65271 2.23363 0.18531

N 1.74633 1.35563 0.92567

C 2.07689 0.18334 1.57703

N 1.06024 –0.62330 1.75301

C –0.02013 0.04506 1.19156

C –1.39558 –0.32706 1.06510

O –1.95107 –1.36375 1.45523

N –2.13035 0.67102 0.39977

C –1.62277 1.85306 –0.08636

N –2.49458 2.68555 –0.68852

N –0.34552 2.19994 0.02723

C 0.38695 1.26778 0.66194

H –3.64449 –1.78103 1.17880

H –7.22660 –2.49585 0.41160

H –8.61326 –0.81185 –0.83430

H 5.36774 –0.66201 –1.66230

H 3.70514 –0.51629 –2.30878

H 4.89860 1.64718 –1.85224

H 4.99683 0.57395 0.93445

H 6.33790 2.70342 –0.30257

H 3.90732 2.48395 1.98303

H 4.32369 3.51297 0.61023

H 2.07030 3.13249 –0.02320

H 3.08822 –0.04115 1.87437

H –2.10779 3.51859 –1.09983

H –3.13278 0.45924 0.24865

H –3.47266 2.43650 –0.85770

H 1.80208 –2.19524 1.21017

H 3.90246 –4.27493 –1.41418

H –4.97874 –2.92572 1.30732

H –7.56989 1.22609 –1.49058

**Structure #17.** Optimized geometry coordinates of C:PQ0 (W–edge)

Energy: –636142.8278525 (au)

N –4.80581 –0.49579 –0.00501

C –3.44367 –0.85820 –0.00167

O –3.15966 –2.06039 –0.00225

N –2.53260 0.15039 0.00207

C –2.91742 1.43379 0.00170

N –1.96415 2.36961 0.00506

C –4.31214 1.80766 –0.00184

C –5.22005 0.80062 –0.00511

N 0.28414 –0.60554 0.00516

C 0.64931 –1.93216 0.00359

N 1.91109 –2.33951 0.00037

C 2.79474 –1.32099 –0.00084

C 2.53887 0.05614 0.00056

C 1.17311 0.47889 0.00315

O 0.74433 1.64330 0.00379

C 3.81278 0.73008 –0.00186

C 4.06831 2.12671 –0.00173

N 4.30452 3.26678 –0.00179

C 4.78056 –0.25410 –0.00492

N 4.15789 –1.48493 –0.00395

N –0.35343 –2.83232 0.00500

H –0.96275 2.10446 0.00517

H –4.62117 2.84474 –0.00197

H –6.29131 0.96849 –0.00790

H 5.85542 –0.16307 –0.00674

H 4.61437 –2.38383 –0.00582

H –0.09100 –3.80359 0.00229

H –2.21420 3.34499 0.00354

H –5.46208 –1.26404 –0.00753

H –1.34018 –2.56186 0.00656

H –0.72236 –0.36104 0.00547

**Structure #18.** Optimized geometry coordinates of C:PRF (W–edge)

Energy: –637665.0915774 (au)

N –4.87752 –0.48951 –0.00652

C –3.52080 –0.87618 0.01454

O –3.25844 –2.08177 0.05004

N –2.59289 0.11697 –0.00641

C –2.95543 1.40500 –0.05114

N –1.98464 2.32333 –0.07499

C –4.34336 1.80382 –0.07215

C –5.26888 0.81303 –0.04839

N 0.22831 –0.67335 0.02065

C 0.57648 –2.00402 0.08854

N 1.82835 –2.42891 0.06799

C 2.73073 –1.42689 –0.03105

C 2.49201 –0.04188 –0.11219

C 1.13555 0.38760 –0.07265

O 0.70770 1.56452 –0.10609

C 3.76764 0.62666 –0.20266

C 4.01003 2.11035 –0.32260

N 3.38810 2.95276 0.70884

C 4.71225 –0.36595 –0.16557

N 4.08161 –1.60750 –0.06761

N –0.44026 –2.88809 0.20000

H –0.98733 2.03764 –0.07933

H –4.63416 2.84562 –0.10647

H –6.33704 0.99956 –0.06167

H 5.09161 2.29404 –0.32606

H 3.63534 2.46490 –1.29101

H 2.37876 2.81724 0.63804

H 3.65263 2.59268 1.62459

H 5.78934 –0.29909 –0.21165

H 4.52994 –2.50793 –0.01200

H –0.18820 –3.86192 0.17853

H –5.54702 –1.24602 0.00990

H –2.21844 3.30165 –0.11959

H –0.77238 –0.41535 0.03342

H –1.42184 –2.61406 0.13010

**Structure #19.** Optimized geometry coordinates of C:XAN (W–edge)

Energy: –600778.5492517 (au)

N –4.40745 0.88792 0.23250

C –3.00099 1.04781 0.40036

O –2.57648 2.13266 0.76085

N –2.23173 –0.05975 0.13917

C –2.79375 –1.22068 –0.19501

N –1.98051 –2.27207 –0.40191

C –4.22001 –1.38111 –0.35241

C –4.98691 –0.28425 –0.12837

N 4.71916 0.37478 –0.01924

C 3.36558 0.53580 –0.07953

N 2.63043 1.66273 –0.31063

C 1.22291 1.59936 –0.34600

O 0.56383 2.58867 –0.59140

N 0.69672 0.33937 –0.08765

C 1.37614 –0.87110 0.12590

O 0.76682 –1.92924 0.27690

C 2.81663 –0.71340 0.13673

N 3.81650 –1.65019 0.32888

C 4.93051 –0.98150 0.23386

H –2.37075 –3.18291 –0.57639

H –4.65752 –2.32944 –0.63589

H –6.06815 –0.28942 –0.21905

H 5.42602 1.08612 –0.12911

H 5.92945 –1.38229 0.33133

H –0.34078 0.29799 –0.02601

H –0.98522 –2.18888 –0.16603

H –4.95370 1.71688 0.41916

H 3.02476 2.57008 –0.50983

**Structure #20.** Optimized geometry coordinates of U:7DG (W–edge)

Energy: –590711.2942665 (au)

N –4.72347 –0.85735 –0.01401

C –3.42801 –1.39155 0.01520

O –3.23161 –2.58948 0.04043

N –2.43184 –0.42573 0.01199

C –2.61745 0.95128 –0.01759

O –1.65184 1.72938 –0.01685

C –3.99892 1.39960 –0.04794

C –4.99322 0.48347 –0.04446

N 4.86336 –0.33083 –0.04823

C 4.75588 –1.61624 –0.04963

C 3.34134 –2.14954 –0.01659

C 2.59594 –0.85688 0.00709

C 1.21190 –0.54198 0.03265

O 0.23957 –1.31700 0.04129

N 0.99604 0.84995 0.04666

C 1.98927 1.78405 0.02821

N 1.59947 3.08752 0.08096

N 3.27926 1.49264 –0.00632

C 3.53018 0.16750 –0.01278

H –4.19426 2.46199 –0.07080

H –6.04327 0.75390 –0.06492

H 5.63946 –2.25059 –0.07307

H 3.12667 –2.77710 –0.89286

H 0.64032 3.33170 –0.11319

H 2.31708 3.76997 –0.10508

H 3.17029 –2.78425 0.86409

H 0.00866 1.15400 0.05676

H –1.45321 –0.78825 0.02936

H –5.46188 –1.54619 –0.01131

**Structure #21.** Optimized geometry coordinates of U:H4B (W–edge)

Energy: –794619.4141100 (au)

N 5.52080 –2.05567 0.03004

C 4.16161 –2.00642 –0.31286

O 3.57458 –2.99057 –0.71815

N 3.59003 –0.75644 –0.14050

C 4.23052 0.38314 0.33200

O 3.62477 1.45657 0.45856

C 5.63855 0.22522 0.66111

C 6.22674 –0.98038 0.49720

N –1.10374 2.94980 0.03052

C 0.19458 2.83141 0.16939

N 0.93789 3.90545 0.60355

N 0.88421 1.69947 –0.13905

C 0.25774 0.53959 –0.60782

O 0.92432 –0.50902 –0.79902

C –1.13227 0.67225 –0.82434

C –1.75895 1.86622 –0.48331

N –1.88996 –0.40271 –1.33945

N –3.10805 1.98776 –0.64812

C –3.23203 –0.50801 –0.76731

C –3.94524 0.84209 –1.00075

C –3.27736 –0.97662 0.72045

O –3.45610 0.15865 1.56456

C –4.37788 –2.02443 0.98057

C –4.05020 –3.40255 0.40145

O –5.59703 –1.50937 0.44879

H 6.17957 1.08542 1.02842

H 7.27197 –1.16263 0.72230

H 1.82831 3.70724 1.03782

H 0.38885 4.63093 1.03994

H –1.34860 –1.26122 –1.30326

H –3.52606 2.73342 –0.11184

H –3.77776 –1.24691 –1.35997

H –4.86287 0.87005 –0.41156

H –4.21422 0.89640 –2.06228

H –2.31172 –1.45852 0.94359

H –3.37858 –0.13729 2.48087

H –3.93856 –3.36290 –0.68611

H –3.12588 –3.80404 0.82966

H –4.85329 –4.11352 0.62795

H 5.95243 –2.95981 –0.09441

H 2.57293 –0.67909 –0.39853

H 1.89959 1.63844 0.02421

H –4.46212 –2.12631 2.07864

H –6.29148 –2.16246 0.60324

**Structure #22.** Optimized geometry coordinates of C:7DG (W–edge)

Energy: –889630.4085984 (au)

O –5.17477 –1.49992 0.73985

C –4.76763 –2.52377 –0.16733

C –3.31773 –2.30651 –0.54837

O –3.18666 –1.05608 –1.25678

C –2.32227 –2.22207 0.62474

O –1.88243 –3.47526 1.07740

C –1.18404 –1.38302 –0.00197

O –0.36769 –2.26933 –0.73103

C –1.95319 –0.44245 –0.96098

N –2.21765 0.90224 –0.36695

C –1.17871 1.85547 –0.43092

O –0.09846 1.50730 –0.94883

N –1.39171 3.09692 0.06199

C –2.56638 3.39736 0.60870

N –2.71853 4.66315 1.06915

C –3.63891 2.45961 0.70288

C –3.41749 1.21647 0.18951

N 6.37249 0.16275 0.42573

C 6.52457 –1.08216 0.72544

C 5.27125 –1.92623 0.65902

C 4.29720 –0.87739 0.23628

C 2.90677 –0.90807 –0.02906

O 2.13526 –1.88485 0.04909

N 2.41891 0.35363 –0.41040

C 3.18407 1.49025 –0.49490

N 2.54837 2.61705 –0.87336

N 4.48693 1.51435 –0.23784

C 4.99056 0.31972 0.11586

H –5.38894 –2.51596 –1.07438

H –4.83896 –3.51915 0.29434

H –3.00870 –3.12902 –1.20825

H –2.78784 –1.69430 1.46278

H –1.13422 –3.68282 0.48610

H –0.60813 –0.82218 0.74140

H 0.58308 –2.09907 –0.49919

H –1.37333 –0.26631 –1.86806

H –3.52633 4.93297 1.60387

H –4.59319 2.71611 1.14528

H –4.16136 0.42723 0.19259

H 7.50073 –1.47400 1.00398

H 5.38255 –2.75433 –0.05508

H 1.53313 2.62608 –0.94642

H 3.08545 3.46785 –0.85289

H 1.42177 0.44026 –0.61833

H 5.04587 –2.38738 1.63091

H –1.91307 5.26895 1.05619

H –6.08061 –1.68373 1.01601

**Structure #23.** Optimized geometry coordinates of C:FFO (W–edge)

Energy: –1617084.1062825 (au)

O 10.33507 3.79829 –0.21237

C 9.23558 4.63436 0.08335

C 7.95380 3.85938 0.27170

O 7.63219 3.02971 –0.87715

C 7.88259 2.88437 1.42114

O 7.80722 3.54711 2.66776

C 6.62887 2.08812 1.06798

O 5.46277 2.83004 1.37983

C 6.74000 2.00870 –0.46450

N 7.21349 0.67404 –0.90153

C 6.20759 –0.29106 –1.03763

O 5.03317 0.04404 –0.82657

N 6.52330 –1.55092 –1.40199

C 7.80255 –1.85407 –1.61313

N 8.05769 –3.11250 –1.96160

C 8.86244 –0.90086 –1.46461

C 8.52681 0.34875 –1.10490

N 2.32925 –4.11635 –0.29755

C 3.21917 –3.16913 –0.60010

N 4.45671 –3.55572 –1.32188

N 3.04737 –1.86017 –0.26011

C 1.94730 –1.46556 0.39519

O 1.80622 –0.13010 0.71538

C 0.96806 –2.42996 0.72262

N –0.22833 –2.18525 1.42465

C –1.35535 –2.94112 1.18116

C –1.01677 –4.37425 1.41499

N 0.17503 –4.83157 0.70474

C 1.19657 –3.77486 0.36082

C –1.79519 –2.72869 –0.26615

N –2.18037 –1.36046 –0.62730

C –6.13267 –0.33872 0.31909

C –5.33960 0.60593 –0.33485

C –4.02419 0.28318 –0.65325

C –3.53002 –0.97976 –0.31989

C –4.33441 –1.91588 0.33189

C –5.64068 –1.59578 0.63768

C –7.59821 –0.06225 0.68529

O –8.06857 –0.47748 1.78642

N –8.45204 0.64169 –0.24887

C –9.82127 0.82829 0.11153

C –10.27109 2.31695 0.28003

C –10.07738 3.24859 –0.84356

C –8.82700 4.04086 –0.84109

O –8.81339 5.24880 –0.35150

O –7.78069 3.51927 –1.31367

C –10.56887 0.15043 –0.96503

O –10.27464 0.41034 –2.22059

O –11.45111 –0.68122 –0.67359

C –0.30269 –1.16871 2.50050

O –1.29955 –0.94946 3.12758

H –9.78208 2.68873 1.18861

H –11.34048 2.27812 0.52869

H –10.16657 2.70910 –1.79578

H –10.86702 4.00230 –0.82342

H –9.95092 0.33012 1.07921

H 9.08076 5.37230 –0.71908

H 9.37890 5.18962 1.02288

H 7.15591 4.60408 0.40895

H 8.76152 2.23242 1.43200

H 6.87055 3.76648 2.79718

H 6.60745 1.09737 1.53512

H 4.69714 2.25085 1.25141

H 5.76219 2.13896 –0.92700

H 8.98172 –3.39965 –2.23991

H 9.89472 –1.17327 –1.64524

H 9.23079 1.16708 –0.99304

H 5.22115 –2.88493 –1.21270

H 4.66603 –4.52043 –1.09841

H –1.84757 –5.03425 1.13576

H –0.85923 –4.52222 2.49184

H –0.95025 –2.99114 –0.91131

H –2.59729 –3.40715 –0.55879

H –1.46933 –0.65486 –0.48223

H –5.74718 1.58045 –0.58408

H –3.37672 0.99802 –1.15195

H –3.96739 –2.88399 0.62826

H –6.28175 –2.29408 1.16440

H 0.65554 –0.64610 2.59779

H 11.14179 4.31731 –0.11499

H 7.28517 –3.71132 –2.21006

H 3.74221 –1.13204 –0.50581

H 0.07087 –5.50707 –0.03979

H –8.19276 0.74016 –1.22045

H –11.52985 –0.82337 0.28211

H –7.07055 4.18160 –1.22348

H –2.12742 –2.61708 1.88350

**Structure #24.** Optimized geometry coordinates of C:H4B (W–edge)

Energy: –782140.3734039 (au)

N 5.26117 –1.89821 0.03411

C 4.19074 –1.03641 0.36995

O 3.15487 –1.53315 0.80000

N 4.39631 0.30476 0.18572

C 5.54766 0.74481 –0.30289

N 5.68539 2.08381 –0.45450

C 6.64124 –0.12208 –0.65297

C 6.44176 –1.45272 –0.46259

N –0.40210 1.98718 0.67227

C 0.61635 1.16557 0.77660

N 1.75411 1.56774 1.43973

N 0.59975 –0.11168 0.29724

C –0.50623 –0.66615 –0.37951

O –0.49736 –1.84800 –0.75468

C –1.59011 0.24863 –0.54370

C –1.51111 1.50215 0.03500

N –2.72457 –0.14966 –1.27704

N –2.62238 2.32348 0.01823

C –3.97342 0.50580 –0.93522

C –3.71105 2.02545 –0.90773

C –4.63703 0.03317 0.38159

O –5.92238 0.67001 0.38934

C –4.78478 –1.50240 0.50632

C –3.61061 –2.20207 1.19711

O –5.01588 –2.03659 –0.80083

H 6.47097 2.47411 –0.94723

H 7.57472 0.25959 –1.04473

H 7.19045 –2.20294 –0.69191

H 2.63702 1.17335 1.12318

H –4.69764 0.30217 –1.72942

H –3.48070 2.34969 –1.93322

H –4.61305 2.54215 –0.57332

H –4.03840 0.38808 1.23291

H –6.30049 0.56572 1.27146

H –3.42786 –1.77118 2.18740

H –3.84404 –3.26424 1.34474

H –2.68830 –2.13966 0.61505

H 5.07707 –2.88364 0.16691

H 4.87097 2.66098 –0.31104

H 1.39829 –0.72796 0.46447

H –2.43307 3.29066 0.23927

H –2.78475 –1.15107 –1.41077

H 1.75944 2.56164 1.61751

H –5.05417 –2.99837 –0.72131

H –5.68465 –1.66172 1.12739

**Structure #25.** Optimized geometry coordinates of C:PRF (W–edge)

Energy: –637650.3755579 (au)

N –4.19055 –1.79951 0.32415

C –3.11268 –0.89405 0.45475

O –2.07079 –1.29705 0.96201

N –3.31599 0.38106 –0.00060

C –4.47606 0.71888 –0.54802

N –4.61306 1.99724 –0.97240

C –5.57830 –0.19457 –0.69055

C –5.37941 –1.45815 –0.23186

N 0.54530 –0.03831 0.41963

C 0.50537 1.31713 0.62890

N 1.54689 2.11206 0.49744

C 2.67771 1.45271 0.13453

C 2.83849 0.08477 –0.12871

C 1.69601 –0.76940 0.02998

O 1.61721 –1.99124 –0.11717

C 4.21535 –0.13992 –0.49009

C 4.85180 –1.45286 –0.87452

N 4.65884 –2.56676 0.06319

C 4.82626 1.08742 –0.42345

N 3.88976 2.05132 –0.05116

N –0.69412 1.83892 1.03602

H –5.41430 2.28765 –1.50692

H –6.51823 0.10413 –1.13527

H –6.13496 –2.23409 –0.28588

H 4.45374 –1.78134 –1.84311

H 5.92755 –1.29423 –1.02398

H 4.93713 –2.25917 0.99394

H 3.65338 –2.74077 0.11864

H 5.85193 1.36357 –0.61989

H 4.06043 3.03395 0.08950

H –1.55064 1.36897 0.75263

H –0.70893 2.84766 1.02367

H –3.79929 2.59233 –0.95778

H –0.29799 –0.59000 0.59741

H –4.00804 –2.73633 0.65864

**Structure #26.** Optimized geometry coordinates of C:THF (W–edge)

Energy: –650888.7116509 (au)

N –4.11136 –1.72374 –0.08635

C –2.75956 –1.39354 –0.05663

O –1.89485 –2.26125 –0.09860

N –2.50724 –0.04366 0.02082

C –3.46163 0.97758 0.06294

O –3.11953 2.15815 0.12874

C –4.84705 0.53005 0.02297

C –5.11807 –0.79055 –0.04855

N 0.29387 0.76222 0.05198

C 0.61434 2.03831 0.12589

N –0.33671 2.98204 0.39337

N 1.90301 2.46411 –0.00667

C 3.01299 1.60469 –0.22083

O 4.15239 2.07594 –0.28294

C 2.64363 0.23475 –0.32699

N 3.64607 –0.72377 –0.59908

C 3.37778 –2.06043 –0.06688

C 1.96995 –2.45866 –0.55590

N 0.99009 –1.46484 –0.14445

C 1.32016 –0.13893 –0.15048

C 3.51713 –2.17398 1.46007

H –5.62763 1.27673 0.05387

H –6.12662 –1.18715 –0.07980

H –0.15195 3.92333 0.08023

H 4.09174 –2.74774 –0.53800

H 1.99756 –2.57005 –1.64930

H 1.68280 –3.42412 –0.12812

H 3.34873 –3.20370 1.79580

H 4.52340 –1.87841 1.77503

H 2.79752 –1.52697 1.96894

H 4.56074 –0.34973 –0.36546

H 0.00886 –1.72556 –0.11801

H –1.31186 2.68674 0.31165

H 2.14614 3.43652 0.13136

H –1.49789 0.23770 0.04650

H –4.30771 –2.71262 –0.14328

**Structure #27.** Optimized coordinates of A:PQ0 (W–edge) complex.

Energy: –681550.0068039 (au)

N –6.24584 –0.50090 –0.08807

C –5.87647 –1.81396 –0.30257

N –4.57766 –1.99109 –0.32682

C –4.06475 –0.72318 –0.11754

C –2.73780 –0.24220 –0.03059

N –1.66895 –1.04600 –0.15897

N –2.56064 1.08242 0.18597

C –3.64541 1.87153 0.31552

N –4.93236 1.53767 0.25567

C –5.08148 0.22242 0.03477

N 2.46715 2.02137 –0.15839

C 1.24326 1.42690 0.03978

N 1.11533 0.11845 0.20933

C 2.29546 –0.55459 0.19520

C 3.58129 –0.04779 –0.00118

C 3.73802 1.36667 –0.20499

O 4.74771 2.02477 –0.38980

C 4.49554 –1.15769 0.06929

C 5.90892 –1.14349 –0.07126

N 7.06715 –1.16651 –0.18195

C 3.73407 –2.28395 0.30531

N 2.40796 –1.90935 0.37646

N 0.15756 2.22750 0.08667

H –6.61494 –2.59332 –0.43333

H –1.83233 –2.02721 –0.31790

H –3.43265 2.92371 0.49296

H 4.03914 –3.31156 0.42456

H 1.63397 –2.52491 0.57134

H –0.78302 1.80724 0.14877

H 2.53129 3.02751 –0.25210

H 0.22636 3.17603 –0.24454

H –0.71953 –0.68614 –0.03250

H –7.18180 –0.12861 –0.02879

**Structure #28.** Optimized geometry coordinates of A:PRF (W–edge)

Energy: –683069.1560738 (au)

N –6.36432 –0.52413 0.25505

C –6.01227 –1.82218 –0.05759

N –4.72438 –1.98038 –0.24466

C –4.20036 –0.71507 –0.04460

C –2.87564 –0.22002 –0.09689

N –1.82370 –1.00216 –0.38551

N –2.68581 1.09727 0.15406

C –3.75401 1.86453 0.44265

N –5.03705 1.51682 0.52402

C –5.19935 0.20943 0.26809

N 2.34324 2.05473 –0.22843

C 1.10771 1.45354 –0.25780

N 0.96276 0.14020 –0.26029

C 2.14118 –0.54505 –0.21799

C 3.44180 –0.03079 –0.16459

C 3.61226 1.39294 –0.20922

O 4.63317 2.06627 –0.24808

C 4.35787 –1.13688 –0.13574

C 5.85303 –1.06456 –0.01293

N 6.24917 –0.86654 1.39164

C 3.58509 –2.27013 –0.17512

N 2.24083 –1.90640 –0.22361

N 0.02014 2.26519 –0.33110

H –6.75450 –2.60543 –0.13186

H –1.99870 –1.97711 –0.56887

H –3.53165 2.91232 0.63455

H 6.29190 –1.96351 –0.48102

H 6.20964 –0.19612 –0.57446

H 3.87207 –3.31144 –0.17295

H 1.45753 –2.53846 –0.25428

H –0.90404 1.84733 –0.15456

H –7.28925 –0.16685 0.44136

H –0.86617 –0.63422 –0.36788

H 0.12996 3.22689 –0.04889

H 2.41560 3.06234 –0.29292

H 7.25704 –0.73564 1.44476

H 6.03516 –1.70714 1.92393

**Structure #29.** Optimized geometry coordinates of U:2BP (W–edge)

Energy: –553581.1112816 (au)

N –3.95586 0.74644 0.02831

C –2.59939 1.05916 0.02105

O –2.21048 2.22237 0.03110

N –1.76934 –0.03588 0.00538

C –2.15213 –1.37821 –0.00681

O –1.30990 –2.27794 –0.01382

C –3.59162 –1.60243 –0.00855

C –4.42956 –0.54307 0.01103

N 1.57279 –1.81221 –0.03144

C 2.80335 –2.44997 0.00679

N 3.82730 –1.63528 0.03602

C 3.25187 –0.37107 0.01849

C 3.75221 0.93216 0.04461

N 2.93493 1.98490 0.02217

C 1.59493 1.75824 –0.02632

N 0.79277 2.84816 –0.06346

N 0.99120 0.54809 –0.04693

C 1.84753 –0.47443 –0.02397

H –3.95497 –2.62013 –0.02195

H –5.50884 –0.64564 0.01381

H 0.63056 –2.20806 –0.04646

H 2.87026 –3.52970 0.01007

H 4.82080 1.13471 0.08528

H 1.22497 3.75382 –0.00393

H –0.21681 2.74707 –0.07174

H –0.74138 0.18166 –0.01443

H –4.58134 1.53899 0.04288

**Structure #30.** Optimized geometry coordinates of U:6GO (W–edge)

Energy: –625444.0533693 (au)

N –4.42352 –1.20454 –0.35936

C –3.03262 –1.18325 –0.34954

O –2.39253 –2.17862 –0.68709

N –2.48408 0.00400 0.05825

C –3.18397 1.14915 0.50336

O –2.58720 2.13848 0.89012

C –4.64156 1.01552 0.45132

C –5.19972 –0.13592 0.02907

C 5.13599 –1.72262 0.44408

O 4.58118 –0.42066 0.20646

C 3.24120 –0.34251 0.09287

N 2.48173 –1.41693 0.18850

C 2.65738 0.90701 –0.13693

N 3.09737 2.20783 –0.31106

C 1.96947 2.95575 –0.51711

N 0.85297 2.26066 –0.49252

C 1.25895 0.96559 –0.25107

N 0.46658 –0.11683 –0.13932

C 1.12750 –1.26743 0.06883

N 0.39563 –2.40371 0.20057

H –5.23886 1.86087 0.76302

H –6.27135 –0.29198 –0.02766

H 4.75399 –2.14415 1.37714

H 4.89361 –2.40445 –0.37489

H 6.21352 –1.56875 0.50691

H 2.02609 4.02358 –0.68327

H 0.90858 –3.26963 0.17845

H –0.57051 –2.39423 –0.12406

H –1.44684 0.05940 0.02381

H –4.83329 –2.07777 –0.65539

H 4.05088 2.53233 –0.28473

**Structure #31.** Optimized geometry coordinates of U:6GU (W–edge)

Energy: –841982.4906724 (au)

N –4.49058 –1.03383 –0.00016

C –3.11140 –1.22144 –0.00025

O –2.61527 –2.34281 –0.00057

N –2.38597 –0.05396 0.00004

C –2.88896 1.24786 0.00018

O –2.13184 2.22106 0.00024

C –4.34249 1.33937 0.00016

C –5.07983 0.20720 –0.00005

Cl 4.93466 –0.63414 –0.00023

N 2.49047 –1.60909 0.00016

C 1.13309 –1.52311 0.00031

N 0.44762 –2.68748 0.00086

N 0.41734 –0.37825 0.00010

C 1.17369 0.72095 0.00006

C 2.58339 0.76648 0.00007

C 3.18997 –0.49305 0.00004

N 3.02578 2.07822 –0.00004

C 1.92281 2.78357 –0.00015

N 0.76494 2.02319 –0.00017

H –4.79742 2.31967 0.00030

H –6.16402 0.20994 –0.00009

H 0.96945 –3.54685 –0.00035

H 1.88033 3.86434 –0.00027

H –0.21649 2.31616 0.00018

H –0.56727 –2.68730 –0.00012

H –1.34441 –0.17962 0.00011

H –5.04108 –1.88047 –0.00076

**Structure #32.** Optimized geometry coordinates of U:7DG (W–edge)

Energy: –590705.7215570 (au)

N 4.18522 –0.96308 0.33502

C 2.80070 –1.05106 0.29128

O 2.23667 –2.11707 0.54835

N 2.16466 0.11073 –0.05271

C 2.77772 1.33695 –0.40976

O 2.10814 2.29458 –0.75070

C 4.23929 1.31633 –0.32742

C 4.88013 0.18821 0.03560

N –1.29801 1.99211 0.46050

C –2.38514 2.68624 0.48411

C –3.65465 1.90282 0.23893

C –3.07028 0.54014 0.06063

C –3.66022 –0.73296 –0.19607

O –4.83257 –1.05073 –0.34978

N –2.64441 –1.74459 –0.26364

C –1.29853 –1.54027 –0.12284

N –0.46961 –2.60097 –0.24621

N –0.78547 –0.33593 0.10118

C –1.70135 0.65748 0.19325

H 4.77250 2.22493 –0.56955

H 5.95925 0.11436 0.11052

H –2.35993 3.75727 0.67143

H –4.35013 1.98753 1.08557

H –0.84541 –3.53455 –0.20445

H –3.00436 –2.67163 –0.45529

H –4.19539 2.27737 –0.64145

H 0.50393 –2.46446 0.04600

H 1.12937 0.08185 –0.03635

H 4.65947 –1.81798 0.58526

**Structure #33.** Optimized geometry coordinates of U:ADE (W–edge)

Energy: –553579.8194580 (au)

N –4.25801 –0.98464 0.00054

C –2.89581 –1.30401 0.00002

O –2.50441 –2.45703 –0.00005

N –2.06686 –0.19700 –0.00037

C –2.45770 1.13930 –0.00025

O –1.62682 2.05400 –0.00066

C –3.89662 1.36173 0.00031

C –4.73375 0.30087 0.00068

N 1.19182 1.72260 –0.00018

C 2.36857 2.43706 0.00017

N 3.44890 1.68683 0.00038

C 2.95004 0.39610 0.00007

C 3.56295 –0.87480 0.00024

N 4.90539 –1.02785 0.00103

N 2.78676 –1.97760 –0.00016

C 1.45661 –1.82353 –0.00063

N 0.75732 –0.68254 –0.00070

C 1.55220 0.40187 –0.00032

H –4.25885 2.37983 0.00043

H –5.81345 0.40265 0.00112

H 0.21731 2.04678 –0.00079

H 2.36838 3.51871 0.00035

H 5.50580 –0.22046 0.00013

H 0.86697 –2.73704 –0.00102

H –4.88048 –1.77959 0.00081

H –1.04345 –0.41529 –0.00066

H 5.29157 –1.95735 –0.00023

**Structure #34.** Optimized geometry coordinates of U:FFO (W–edge)

Energy: –1007601.9050733 (au)

N 7.20413 –1.45958 –0.88259

C 6.19783 –0.50777 –0.78929

O 6.35038 0.62630 –1.23753

N 5.05569 –0.94830 –0.16830

C 4.83030 –2.22800 0.35458

O 3.75698 –2.50511 0.88629

C 5.94538 –3.15332 0.20938

C 7.07850 –2.73968 –0.39680

N 2.90130 1.00665 0.05693

C 3.05309 2.22528 –0.42880

N 4.26063 2.62784 –0.89324

N 2.02844 3.12257 –0.45378

C 0.71319 2.86023 0.02596

O –0.15124 3.72507 –0.11378

C 0.60388 1.58123 0.64878

N –0.63939 1.12939 1.17026

C –0.92070 –0.30041 1.01940

C 0.27787 –1.07837 1.59057

N 1.52604 –0.59267 1.01715

C 1.67308 0.68387 0.59110

C –1.21726 –0.63707 –0.45904

N –2.33726 0.10003 –1.01201

C –6.42342 –0.85785 –0.53095

C –5.43540 –1.81951 –0.28493

C –4.08506 –1.52512 –0.41366

C –3.66708 –0.23383 –0.79587

C –4.66119 0.74274 –1.01916

C –6.00603 0.43489 –0.88872

C –7.84941 –1.26833 –0.37980

O –8.17957 –2.31777 0.16469

N –8.79955 –0.39122 –0.86462

C –1.44037 1.91163 1.97606

O –2.46370 1.51711 2.51005

H 5.83322 –4.15680 0.59455

H 7.94256 –3.37932 –0.53589

H 4.32118 3.46058 –1.45636

H –1.80752 –0.50030 1.62436

H 0.18963 –2.14720 1.36772

H 0.27697 –0.96888 2.68331

H –0.33569 –0.41619 –1.06961

H –1.39858 –1.71036 –0.55878

H –2.16850 1.09680 –1.06535

H –5.75630 –2.81183 0.01384

H –3.35707 –2.30429 –0.21747

H –4.36053 1.75325 –1.28370

H –6.73352 1.22894 –1.03141

H –8.55988 0.24538 –1.60872

H –9.73909 –0.76130 –0.87840

H –1.06132 2.93979 2.06842

H 2.14858 4.04921 –0.84244

H 2.32853 –1.22058 0.98148

H 4.99878 1.93185 –1.01003

H 8.05095 –1.14705 –1.33563

H 4.28125 –0.25290 –0.07921

**Structure #35.** Optimized geometry coordinates of U:FFO (W–edge)

Energy: –1318178.4319365 (au)

N –6.69664 3.96290 –0.38015

C –6.06141 2.78808 –0.02966

O –4.98767 2.75277 0.54555

N –6.72183 1.64004 –0.36557

C –7.92795 1.54315 –1.01021

O –8.37525 0.42241 –1.22965

C –8.52872 2.79589 –1.35859

C –7.91086 3.93934 –1.03230

N –5.42532 –0.96701 0.02292

C –5.70165 –2.00810 –0.76482

N –7.00235 –2.03880 –1.47842

N –4.84472 –3.05529 –0.93073

C –3.66082 –3.07228 –0.30359

O –2.81728 –4.14688 –0.50281

C –3.31613 –1.98358 0.52831

N –2.12631 –1.85774 1.27162

C –1.58468 –0.61646 1.52973

C –2.61014 0.20342 2.23644

N –3.90842 0.24464 1.56815

C –4.24155 –0.92863 0.67877

C –1.19644 0.04295 0.20769

N –0.17416 –0.65161 –0.58187

C 3.77725 0.17050 0.54548

C 3.55829 –0.67441 –0.54407

C 2.25205 –0.95973 –0.92905

C 1.19087 –0.38842 –0.22343

C 1.42379 0.45660 0.86277

C 2.72004 0.74455 1.23578

C 5.18960 0.54668 1.01673

O 5.44331 0.64249 2.25474

N 6.22161 0.82913 0.04080

C 7.50462 1.22742 0.52526

C 8.68039 0.25482 0.18103

C 8.93142 –0.08418 –1.22962

C 8.28827 –1.31537 –1.74117

O 8.94489 –2.44120 –1.76345

O 7.09534 –1.25063 –2.14463

C 7.71011 2.56351 –0.06637

O 7.51372 2.73807 –1.35541

O 8.03997 3.51763 0.66551

C –1.45677 –3.03682 1.86989

O –0.45451 –2.96109 2.52160

H 8.52316 –0.64921 0.78169

H 9.58292 0.72056 0.59984

H 8.66043 0.76449 –1.87145

H 9.99870 –0.26721 –1.36894

H 7.41645 1.27006 1.61687

H –9.48025 2.79448 –1.87166

H –8.32618 4.91314 –1.26715

H –2.27402 1.23981 2.36487

H –2.74254 –0.20339 3.24845

H –2.09434 0.08830 –0.41742

H –0.89414 1.08200 0.33857

H –0.39377 –1.60520 –0.84041

H 4.39964 –1.10564 –1.07703

H 2.04628 –1.62140 –1.76504

H 0.62356 0.88612 1.44146

H 2.93146 1.37895 2.08949

H –1.98760 –3.95772 1.60465

H –5.03516 –3.82115 –1.56592

H –7.47084 –2.93411 –1.41392

H –7.57795 –1.23270 –1.22501

H –6.26624 0.73877 –0.13258

H –6.22796 4.82279 –0.13556

H –4.28399 1.13420 1.24462

H –0.71352 –0.76501 2.17208

H 5.99017 1.02219 –0.92366

H 8.09664 3.26854 1.60105

H 6.84839 –2.14773 –2.43647

**Structure #36.** Optimized geometry coordinates of U:N6M (W–edge)

Energy: –578244.6719088 (au)

N 4.41533 –1.11718 0.00384

C 3.03275 –1.32778 –0.00157

O 2.55395 –2.45022 –0.00406

N 2.29599 –0.16263 –0.00361

C 2.78737 1.14129 0.00057

O 2.01734 2.10486 –0.00047

C 4.24031 1.25237 0.00626

C 4.99050 0.12863 0.00768

C –1.43016 0.55326 –0.01454

C –2.80655 0.19341 –0.00372

C –3.08085 –1.18219 0.00646

C –0.95309 –1.74616 0.00023

C –4.93455 0.02524 0.00116

C –1.69059 3.03633 0.02351

N –0.92999 1.79941 –0.03873

N –0.53309 –0.47071 –0.01010

N –2.20624 –2.19812 0.00912

N –4.45399 –1.26652 0.01006

N –3.98592 0.92750 –0.00719

H 4.68223 2.23858 0.00928

H 6.07490 0.14427 0.01188

H –0.15718 –2.48805 0.00200

H –5.99528 0.23630 0.00192

H –2.74157 2.84436 –0.18634

H –1.61270 3.49938 1.01572

H –1.29678 3.74303 –0.71357

H –4.98640 –2.12326 0.01766

H 4.97422 –1.95787 0.00554

H 1.25246 –0.27663 –0.00788

H 0.09030 1.87403 –0.01984

**Structure #37.** Optimized geometry coordinates of U:XAN (W–edge)

Energy: –613260.4982540 (au)

N –4.93047 –0.20485 0.01302

C –3.79449 –1.02385 0.00664

O –3.87412 –2.23483 0.01013

N –2.60263 –0.31109 –0.00384

C –2.46300 1.07187 –0.00865

O –1.34363 1.60513 –0.01777

C –3.70390 1.82546 –0.00239

C –4.88250 1.16243 0.00802

N 2.58885 2.12333 0.00209

C 2.28288 0.79500 –0.00114

N 1.04589 0.21434 –0.00806

C 0.95099 –1.16183 –0.00994

O –0.13447 –1.74841 –0.01565

N 2.15551 –1.83748 –0.00507

C 3.49499 –1.33142 0.00269

O 4.43500 –2.10182 0.00690

C 3.48982 0.11873 0.00425

N 4.54110 1.01720 0.01102

C 3.97983 2.19453 0.00958

H –3.65049 2.90454 –0.00609

H –5.84170 1.66827 0.01327

H 1.93435 2.89188 0.00049

H 4.49232 3.14605 0.01329

H –1.73956 –0.88476 –0.00872

H 0.15834 0.74860 –0.01305

H 2.07761 –2.84723 –0.00614

H –5.80869 –0.70364 0.01968

**Structure #38.** Optimized geometry coordinates of C:29G (W–edge)

Energy: –599759.3753018 (au)

N 5.11240 –0.24336 –0.01340

C 3.90306 –0.99080 –0.00962

O 3.96581 –2.21327 –0.01785

N 2.74254 –0.26725 0.00318

C 2.75620 1.06741 0.01109

N 1.57730 1.70442 0.02407

C 3.98749 1.82442 0.00654

C 5.14359 1.11502 –0.00591

N –4.23639 –2.32592 –0.01935

C –3.13725 –1.52407 0.00519

N –1.95910 –2.11326 0.00940

C –3.26396 –0.08370 –0.00594

C –4.44597 0.66412 –0.04314

N –4.46539 1.99237 –0.03806

C –3.24548 2.58059 0.00097

N –2.05626 2.00852 0.02194

C –2.03731 0.64490 0.01291

N –0.84075 0.03739 0.01776

C –0.84840 –1.31027 0.00363

N 0.33031 –1.93680 –0.00662

H 1.53695 2.70978 0.02720

H 3.98890 2.90664 0.01266

H 6.12324 1.58126 –0.01042

H –5.13952 –1.96813 0.24235

H –5.42021 0.17537 –0.08899

H 1.21294 –1.40340 –0.00370

H 0.33590 –2.94351 –0.01490

H 0.69692 1.16634 0.02457

H –4.06836 –3.31144 0.11815

H –3.25633 3.66969 0.01229

H 5.95856 –0.79483 –0.02325

**Structure #39.** Optimized geometry coordinates of C:29H (W–edge)

Energy: –612230.4387673 (au)

N –5.06545 –0.23991 0.00151

C –3.84765 –0.96748 0.00009

O –3.88294 –2.19152 –0.00054

N –2.69854 –0.22542 –0.00028

C –2.72752 1.10970 –0.00045

N –1.55635 1.75964 –0.00108

C –3.96987 1.84607 –0.00016

C –5.11506 1.11847 0.00065

N 1.93316 –2.07517 –0.00074

C 3.24794 –1.57495 0.00001

O 4.20174 –2.33639 0.00043

C 3.28422 –0.11434 0.00003

C 4.47780 0.60908 0.00061

N 4.50838 1.94152 0.00063

C 3.29898 2.53851 0.00006

N 2.09795 1.97479 –0.00046

C 2.07063 0.61938 –0.00017

N 0.84497 0.02987 –0.00008

C 0.79274 –1.29491 –0.00022

N –0.39302 –1.90665 0.00028

H –1.52542 2.76542 –0.00038

H –3.98856 2.92802 –0.00055

H –6.10128 1.57021 0.00101

H 5.42702 0.07747 0.00091

H –1.25708 –1.32553 –0.00024

H –0.67331 1.23027 –0.00059

H –5.90473 –0.80221 0.00053

H –0.47650 –2.91000 –0.00069

H 3.31406 3.62749 0.00005

H 1.86444 –3.08576 –0.00035

**Structure #40.** Optimized geometry coordinates of C:5AZ (W–edge)

Energy: –505747.7955300 (au)

N –4.20039 –0.73254 –0.00213

C –2.85842 –1.19366 0.00001

O –2.63864 –2.39696 0.00041

N –1.88864 –0.22689 0.00168

C –2.19516 1.07013 0.00134

N –1.17927 1.94812 0.00389

C –3.56088 1.53532 –0.00117

C –4.53052 0.58518 –0.00274

C 4.21936 –0.19654 –0.00104

N 3.04680 –1.01512 –0.00009

C 1.78008 –0.51518 0.00084

N 1.59266 0.81205 –0.00006

C 2.73007 1.54934 –0.00082

N 3.98142 1.16321 –0.00115

N 0.73485 –1.34028 0.00276

O 5.30625 –0.73911 –0.00176

H –0.20789 1.60633 0.00284

H –3.80389 2.58975 –0.00142

H –5.58892 0.82272 –0.00461

H 2.56316 2.62732 –0.00139

H 0.85577 –2.34048 0.00216

H –1.36311 2.93738 0.00074

H 3.22070 –2.01271 0.00050

H –4.90548 –1.45627 –0.00321

H –0.23037 –0.95285 0.00242

**Structure #41.** Optimized geometry coordinates of C:5GP (W–edge)

Energy: –1255956.1817503 (au)

N 8.23780 0.35791 0.94029

C 6.87015 0.62137 0.71278

O 6.42199 1.71594 1.06835

N 6.13727 –0.35597 0.11269

C 6.69566 –1.52701 –0.22840

N 5.91172 –2.44660 –0.79728

C 8.09805 –1.79639 –0.00048

C 8.82810 –0.81713 0.58999

P –6.99524 –1.36979 0.52141

O –6.39053 –2.62710 –0.31667

O –8.37407 –1.00885 0.14723

O –6.68817 –1.85694 2.02987

O –5.95864 –0.16066 0.35624

C –4.57434 –0.29096 0.74071

C –3.88533 1.04657 0.48585

O –2.54671 0.89899 0.98596

C –3.75602 1.47570 –0.98735

O –4.84958 2.29442 –1.32656

C –2.37508 2.17698 –1.02232

O –2.58445 3.54642 –0.72533

C –1.58823 1.45623 0.10133

N –0.67011 0.43113 –0.37618

C –0.95572 –0.79346 –0.97597

N 0.10664 –1.50556 –1.23859

C 1.16135 –0.73162 –0.78351

C 2.57228 –0.97519 –0.77348

O 3.18467 –1.96863 –1.19543

N 3.27582 0.10028 –0.19910

C 2.71379 1.25274 0.30278

N 3.56319 2.18167 0.79219

N 1.40736 1.48553 0.30134

C 0.70171 0.47101 –0.24082

H 4.90386 –2.26002 –0.95779

H 8.54646 –2.73936 –0.28475

H 9.88571 –0.91510 0.80816

H –4.09901 –1.08406 0.15247

H –4.50299 –0.54935 1.80044

H –4.40838 1.84137 1.03138

H –3.75167 0.60770 –1.65601

H –4.57048 3.20446 –1.13708

H –1.87364 2.05810 –1.98971

H –1.78346 4.04061 –0.93765

H –0.96080 2.17376 0.63904

H –1.97297 –1.09567 –1.18086

H 4.56845 2.01731 0.88945

H 4.30101 –0.02233 –0.12816

H 3.14268 2.98351 1.23143

H 6.29501 –3.33812 –1.06597

H 8.75629 1.10259 1.38468

H –6.84566 –2.69261 –1.16902

H –7.24415 –2.60632 2.28517

**Structure #42.** Optimized geometry coordinates of C:GMP (W–edge)

Energy: –899691.7051697 (au)

N –5.62994 –1.86314 0.18313

C –5.08819 –0.57010 –0.05174

O –5.85008 0.37485 –0.19904

N –3.72198 –0.48647 –0.08846

C –2.95471 –1.55786 0.11421

N –1.62515 –1.37922 0.06173

C –3.50708 –2.86599 0.36914

C –4.86111 –2.96301 0.39107

O 4.11921 –1.77159 2.61310

C 2.86682 –1.35868 2.09477

C 2.60410 –1.96937 0.71488

O 1.36853 –1.44512 0.16021

C 3.72085 –1.68667 –0.32781

O 4.49432 –2.81636 –0.65542

C 2.92115 –1.14900 –1.54657

O 2.55084 –2.24105 –2.38871

C 1.66850 –0.53865 –0.90944

N 1.82202 0.84032 –0.48203

C 2.97695 1.61159 –0.29948

N 2.72358 2.85293 0.00382

C 1.34417 2.93665 0.02836

C 0.48466 4.06811 0.26595

O 0.74305 5.22828 0.53128

N –0.88783 3.66388 0.13830

C –1.36441 2.40631 –0.14711

N –2.69545 2.23480 –0.24196

N –0.54573 1.37622 –0.35173

C 0.76469 1.70645 –0.26550

H –1.25470 –0.43225 –0.07473

H –2.87551 –3.72972 0.53004

H –5.38346 –3.89677 0.57033

H 2.91425 –0.26900 2.01190

H 2.03181 –1.60066 2.76903

H 2.48138 –3.05640 0.80771

H 4.40532 –0.92902 0.06579

H 4.08960 –3.18499 –1.45916

H 3.48414 –0.45740 –2.17458

H 1.82571 –2.71265 –1.95064

H 0.81134 –0.56690 –1.58552

H 3.96524 1.19143 –0.41405

H –3.32206 2.96430 0.05808

H –1.53951 4.42690 0.27507

H –3.07913 1.27527 –0.27833

H –0.97341 –2.10474 0.31095

H –6.63905 –1.90868 0.20590

H 4.11597 –2.73471 2.69689

**Structure #43.** Optimized geometry coordinates of U:SAM (W–edge)

Energy: –1319605.0950895 (au)

N 6.86814 –0.70262 –1.52328

C 5.51711 –0.89694 –1.24858

O 4.86624 –1.81415 –1.72720

N 4.99402 0.04656 –0.38930

C 5.65252 1.12075 0.20352

O 5.04218 1.88481 0.95749

C 7.05804 1.23473 –0.14703

C 7.60487 0.32623 –0.98736

N –0.99647 3.14553 –0.53623

C –2.39556 3.20116 –0.94351

C –3.05477 4.47237 –0.33066

O –4.25307 4.58791 –0.21608

O –2.17929 5.41485 0.00756

C –3.30393 1.98642 –0.63436

C –3.10643 0.84694 –1.62556

S –4.28114 –0.58513 –1.47210

C –5.88333 0.17804 –1.05340

C –3.79729 –1.41340 0.10919

C –2.89178 –2.60210 –0.16914

O –1.74880 –2.15351 –0.91587

C –2.35434 –3.24436 1.13778

O –3.17744 –4.26234 1.62896

C –0.95509 –3.72432 0.68919

O –1.03118 –5.04573 0.16862

C –0.53620 –2.70107 –0.38868

N 0.34077 –1.63305 0.05786

C 1.65926 –1.48015 –0.34018

N 2.23626 –0.43988 0.20055

C 1.26989 0.14227 0.99589

C 1.28504 1.30092 1.81814

N 2.35114 2.08559 1.97595

N 0.12980 1.62081 2.45986

C –0.93279 0.82672 2.31824

N –1.06889 –0.28064 1.56817

C 0.07633 –0.57783 0.92657

H 7.63656 2.04392 0.27526

H 8.64704 0.35679 –1.28445

H –0.39614 2.65432 –1.18824

H –0.86241 2.76280 0.39712

H –2.40777 3.38405 –2.02708

H –3.11031 1.64829 0.38885

H –4.32585 2.37132 –0.67560

H –2.13275 0.35527 –1.54937

H –3.25085 1.17353 –2.66063

H –6.60971 –0.63470 –0.99952

H –5.83032 0.71719 –0.10790

H –3.27719 –0.68458 0.73657

H –4.72741 –1.74397 0.57949

H –3.43086 –3.36317 –0.75060

H –2.24446 –2.46958 1.90168

H –2.81256 –5.10138 1.29917

H –0.24072 –3.76826 1.51231

H –1.43963 –5.03814 –0.70948

H 0.00648 –3.21570 –1.18858

H 2.14751 –2.16275 –1.02466

H 3.26742 1.89856 1.55187

H –1.81372 1.12488 2.88420

H 3.99622 –0.08055 –0.15539

H 2.26207 2.86364 2.61360

H –1.28826 5.02685 –0.15266

H –6.15266 0.85230 –1.86836

H 7.28663 –1.37807 –2.14727

**Structure #44.** Optimized geometry coordinates of U:SAM (W–edge)

Energy: –1352537.2166018 (au)

N –4.24404 3.94428 –1.80477

C –5.02050 4.54390 –0.83149

N –5.55597 3.68775 0.00455

C –5.11660 2.46033 –0.44765

C –5.34174 1.14819 0.02884

N –6.08901 0.90736 1.11849

N –4.76551 0.12333 –0.64810

C –4.01780 0.40980 –1.73326

N –3.70940 1.59235 –2.25695

C –4.29793 2.59149 –1.57347

N –4.76434 –2.79937 0.23830

C –3.91592 –2.73119 1.42285

C –4.74562 –2.13062 2.58952

O –4.24771 –1.71306 3.60537

O –6.06372 –2.09911 2.33157

C –2.61821 –1.89202 1.31477

C –1.69707 –2.40191 0.21001

S –0.09547 –1.48129 0.19624

C –0.56929 0.22572 –0.23494

C 0.69243 –2.14042 –1.34565

C 1.74323 –1.16845 –1.88708

O 2.43109 –0.60515 –0.77354

C 2.81168 –1.84180 –2.79675

O 2.98361 –1.18625 –4.04072

C 4.09825 –1.76000 –1.93369

O 5.27704 –1.76013 –2.67495

C 3.84169 –0.47642 –1.11802

N 4.60824 –0.27907 0.05965

C 5.08251 –1.19440 1.00135

N 5.70717 –0.63437 1.99990

C 5.65039 0.72554 1.72926

C 6.14175 1.86572 2.40615

N 6.81120 1.78898 3.57287

N 5.91642 3.07921 1.86328

C 5.24138 3.15557 0.71027

N 4.72543 2.15903 –0.02593

C 4.97186 0.97532 0.53949

H –5.14999 5.61695 –0.79438

H –6.25026 –0.02993 1.46186

H –3.61390 –0.45861 –2.25440

H –6.14945 –2.52994 1.44120

H –4.54422 –3.55928 –0.39366

H –3.65850 –3.75492 1.72354

H –2.90677 –0.85792 1.10706

H –2.12457 –1.91440 2.29026

H –2.15071 –2.30982 –0.78077

H –1.39840 –3.44333 0.37244

H –1.18811 0.26416 –1.13302

H –1.11370 0.62287 0.62256

H 0.36863 0.76926 –0.35531

H –0.08957 –2.34570 –2.08145

H 1.14579 –3.08051 –1.01876

H 1.23840 –0.38214 –2.46819

H 2.55981 –2.87326 –3.05526

H 3.05530 –0.22904 –3.90936

H 4.11886 –2.61013 –1.24070

H 5.05054 –1.49562 –3.58183

H 3.98320 0.42350 –1.73040

H 4.94516 –2.25934 0.87848

H 7.19962 2.63274 3.96405

H 5.09311 4.16031 0.32145

H –6.50749 1.68575 1.60455

H –3.76567 4.40014 –2.56833

H –4.81898 –1.89699 –0.24854

H 7.06857 0.89274 3.95318

**Structure #45.** Optimized geometry coordinates of U:SFG (W–edge)

Energy: –1104243.3060471 (au)

N 4.78808 0.63612 –2.28074

C 3.62268 –0.11504 –2.13587

O 2.77723 –0.18657 –3.01458

N 3.53791 –0.76975 –0.92442

C 4.38736 –0.62692 0.16354

O 4.11293 –1.16103 1.24863

C 5.56661 0.18473 –0.07916

C 5.71238 0.79098 –1.27964

N 1.32927 2.21344 –0.84964

C 1.00992 2.69872 0.50194

C 1.99293 2.01866 1.45219

O 2.82868 2.57570 2.12699

O 1.83159 0.67368 1.43003

C –0.45197 2.50107 0.97296

C –1.47155 3.18094 0.04786

C –2.94227 3.11239 0.51243

N –3.09697 3.91482 1.73716

C –3.51562 1.68249 0.66229

C –3.66484 0.83813 –0.59840

O –2.37170 0.49938 –1.15597

C –4.36418 –0.51762 –0.34581

O –5.76944 –0.45355 –0.41709

C –3.73963 –1.43278 –1.41844

O –4.50103 –1.37506 –2.62945

C –2.33116 –0.84278 –1.62438

N –1.23203 –1.54703 –0.97683

C 0.06984 –1.46492 –1.43155

N 0.95510 –1.87906 –0.55976

C 0.21604 –2.23951 0.55365

C 0.58050 –2.70267 1.84005

N 1.86035 –2.87458 2.22977

N –0.40918 –2.99148 2.71187

C –1.67695 –2.78672 2.33728

N –2.14185 –2.30083 1.17848

C –1.14639 –2.04132 0.32202

H 6.28192 0.31442 0.72016

H 6.55582 1.42998 –1.51583

H 0.82248 2.75903 –1.54115

H 1.02027 1.24911 –0.94846

H 1.25892 3.76387 0.53773

H –0.65248 1.42626 1.03319

H –0.53377 2.90508 1.99096

H –1.40164 2.73120 –0.94684

H –1.22064 4.24481 –0.04607

H –3.53571 3.62360 –0.25927

H –4.08346 3.98400 1.97926

H –2.65555 3.43599 2.52033

H –4.52812 1.77124 1.07929

H –2.92812 1.11176 1.39276

H –4.23820 1.39994 –1.35506

H –4.07903 –0.89478 0.63959

H –6.00108 –0.70986 –1.32495

H –3.72131 –2.48141 –1.12306

H –4.39058 –0.49795 –3.02533

H –2.08695 –0.85288 –2.69373

H 4.86275 1.14707 –3.14844

H 2.64966 –1.28890 –0.76812

H –2.43075 –3.03942 3.07986

H 0.31665 –1.08362 –2.41436

H 2.62612 –2.42127 1.73447

H 1.99836 –3.10578 3.20242

H 2.57140 0.25951 1.91335

**Structure #46.** Optimized geometry coordinates of U:SAH (W–edge)

Energy: –1294701.6828546 (au)

N 5.81003 –1.50904 –1.97943

C 4.48667 –1.53677 –1.53487

O 3.61389 –2.14604 –2.13536

N 4.27873 –0.82040 –0.37699

C 5.22385 –0.10387 0.35660

O 4.90077 0.49772 1.38136

C 6.57413 –0.13927 –0.19113

C 6.81166 –0.83335 –1.32572

N 0.15553 1.90413 –1.63573

C –0.66078 3.06891 –1.32173

C –2.08392 2.64051 –0.88343

C –2.82267 1.87964 –1.98558

S –4.56020 1.43082 –1.57354

C –0.02776 3.95629 –0.23106

O –0.58092 5.18633 –0.05775

O 0.89456 3.60339 0.46144

C –4.38318 0.23839 –0.18902

C –3.88131 –1.15002 –0.55339

O –2.52109 –1.06928 –1.03917

C –3.83480 –2.11913 0.65328

O –5.03322 –2.82728 0.86322

C –2.64097 –3.02742 0.29633

O –3.08262 –4.13675 –0.49353

C –1.71112 –2.10818 –0.52316

N –0.56425 –1.55359 0.18735

C 0.72805 –1.57882 –0.29379

N 1.57194 –0.90753 0.45057

C 0.80630 –0.38696 1.48108

C 1.12389 0.42862 2.59732

N 2.36437 0.85180 2.87729

N 0.11381 0.77657 3.42731

C –1.12061 0.34523 3.15705

N –1.54305 –0.42285 2.14151

C –0.52979 –0.76455 1.33341

H 7.35626 0.39571 0.32852

H 7.79340 –0.89709 –1.78185

H 1.01687 2.21099 –2.08258

H –0.75118 3.67630 –2.23510

H –1.98699 2.01152 0.00882

H –2.66901 3.51813 –0.58344

H –2.26578 0.98808 –2.26785

H –2.93016 2.50978 –2.87610

H –5.39590 0.13659 0.21471

H –3.75191 0.65744 0.59931

H –4.51655 –1.57493 –1.34516

H –3.59428 –1.55564 1.55742

H –4.94246 –3.65813 0.36840

H –2.14825 –3.45987 1.16780

H –3.34447 –3.80958 –1.36691

H –1.27440 –2.68725 –1.34608

H 1.00083 –2.10590 –1.19871

H 3.16269 0.68656 2.26536

H –1.88995 0.66182 3.85835

H 5.98897 –2.02853 –2.82634

H 3.29817 –0.82281 –0.02164

H 2.46382 1.49400 3.64826

H 0.45870 1.48584 –0.75645

H –1.30205 5.31985 –0.69002

**Structure #47.** Optimized geometry coordinates of G:C2E (W–edge)

Energy: –2260799.6748452 (au)

N –7.34093 –1.19860 0.01121

C –7.20819 –1.82765 –1.21829

N –6.15044 –1.44079 –1.87927

C –5.54939 –0.50999 –1.04947

C –4.36785 0.26664 –1.21749

O –3.57206 0.29001 –2.18201

N –4.13397 1.10670 –0.12245

C –4.89802 1.15712 1.01642

N –4.48591 2.00343 1.99674

N –6.00184 0.44673 1.19155

C –6.27578 –0.34568 0.13637

P 4.25268 –0.22331 –1.00199

O 5.60428 –0.70798 –1.33151

O 4.01109 0.66428 0.30331

O 3.14129 –1.38152 –0.77125

C 3.15751 –2.58654 –1.55306

C 2.16067 –3.56144 –0.95314

O 2.70685 –4.14956 0.26122

C 0.81344 –2.97097 –0.50316

O –0.12838 –2.84022 –1.56824

C 0.41694 –3.91982 0.64071

O 0.01738 –5.20716 0.22742

C 1.79097 –3.98427 1.34005

N 2.13615 –2.74711 2.08691

C 3.40159 –2.19082 2.14467

N 3.42911 –0.99612 2.68939

C 2.10796 –0.74405 3.03781

C 1.49066 0.40215 3.63620

O 1.99807 1.43409 4.09817

N 0.08108 0.27628 3.62616

C –0.63013 –0.77029 3.08969

N –1.97941 –0.62925 2.98624

N –0.05278 –1.88446 2.69059

C 1.28869 –1.80839 2.64911

P –1.07552 –1.51106 –1.43074

O –2.05789 –1.73471 –2.64029

O –1.61246 –1.27005 –0.07127

O –0.06569 –0.29748 –1.84086

C 0.55951 –0.28527 –3.13388

C 1.43298 0.94705 –3.28328

O 0.60118 2.11683 –3.47076

C 2.35202 1.31192 –2.10057

O 3.64661 0.69516 –2.19419

C 2.47862 2.83230 –2.26781

O 3.25732 3.15265 –3.40639

C 1.03036 3.16952 –2.63316

N 0.13392 3.20994 –1.44506

C –1.19936 2.83764 –1.49998

N –1.76482 2.77008 –0.32188

C –0.76530 3.10160 0.57188

C –0.73012 2.97525 1.98931

O –1.62597 2.58810 2.76760

N 0.54118 3.28266 2.49935

C 1.66418 3.53665 1.74481

N 2.83304 3.68309 2.42958

N 1.63299 3.64844 0.43359

C 0.42462 3.38254 –0.10583

H –7.93005 –2.55773 –1.55793

H –5.01876 1.96149 2.85119

H 4.00177 0.15545 1.15194

H 4.16193 –3.01913 –1.55293

H 2.87256 –2.36341 –2.58741

H 2.00154 –4.36505 –1.68513

H 1.00588 –1.99069 –0.06461

H –0.37894 –3.51276 1.25573

H 0.73517 –5.62203 –0.27091

H 1.89000 –4.84913 1.99923

H 4.25267 –2.70598 1.72621

H –2.35489 –1.20147 2.23629

H 1.17453 –1.18254 –3.26112

H –0.20422 –0.28274 –3.91761

H 2.04744 0.82126 –4.18300

H 1.87830 1.06434 –1.15012

H 2.83271 3.32954 –1.36535

H 4.09441 2.67412 –3.31325

H 0.94591 4.10916 –3.18337

H –1.67685 2.57792 –2.43215

H 3.64157 3.68326 1.82196

H –8.06709 –1.33454 0.69823

H –3.52928 2.34594 2.05304

H –3.28983 1.70339 –0.18490

H 2.92510 3.07866 3.24402

H 0.69563 3.07396 3.48287

H –2.31810 0.32649 2.96757

H –0.44279 1.10923 3.88480

H –2.79730 –1.03948 –2.59579

**Structure #48.** Optimized geometry coordinates of U:6AP (W–edge)

Energy: –588326.5898595 (au)

N –4.57532 0.74204 –0.00155

C –3.22443 1.09995 0.00154

O –2.86869 2.26916 0.00417

N –2.36591 0.02334 0.00094

C –2.70941 –1.32727 –0.00159

O –1.84024 –2.20048 –0.00096

C –4.14274 –1.59497 –0.00494

C –5.01099 –0.56009 –0.00486

N 1.92882 2.37651 0.00278

C 0.57789 2.10871 0.00433

N 0.32874 0.82111 0.00271

C 1.57187 0.20662 –0.00213

C 2.58940 1.16340 –0.00196

N 3.90673 0.94705 –0.00314

C 4.17761 –0.37253 –0.01012

N 5.50565 –0.71872 –0.06578

N 3.30951 –1.40729 0.00023

C 1.99052 –1.14818 0.00300

N 1.12935 –2.18223 0.01625

H –4.47537 –2.62326 –0.00749

H –6.08720 –0.69374 –0.00732

H 2.36881 3.28378 –0.00072

H –0.18130 2.87852 0.00649

H 5.72348 –1.66532 0.20307

H 6.15997 0.00090 0.19910

H 1.52182 –3.10993 0.00523

H 0.11780 –2.06664 0.00856

H –5.22301 1.51629 –0.00181

H –1.34469 0.26344 0.00229

**Structure #49.** Optimized geometry coordinates of U:SAM (W–edge)

Energy: –1319523.9736398 (au)

N –5.78540 3.75056 –0.64023

C –5.02023 2.85072 0.06863

O –5.27791 2.54018 1.20843

N –3.94428 2.33826 –0.60283

C –3.55795 2.63745 –1.88693

O –2.57795 2.06800 –2.36635

C –4.38600 3.60218 –2.55590

C –5.44562 4.11406 –1.92346

N 6.85893 1.61310 1.58549

C 6.22343 2.24274 0.40084

C 6.07932 3.74858 0.61228

O 5.61370 4.45315 –0.27725

O 6.36199 4.25646 1.68875

C 4.82073 1.64234 0.17425

C 4.85514 0.31375 –0.60503

S 3.58661 –0.79875 0.09150

C 4.68632 –2.08042 0.74688

C 2.96979 –1.66896 –1.37694

C 1.88087 –2.63311 –0.91371

O 0.94078 –1.89040 –0.17127

C 1.12028 –3.24282 –2.09608

O 1.53022 –4.58905 –2.36725

C –0.36833 –3.19872 –1.63648

O –0.97569 –4.46910 –1.90238

C –0.26510 –2.63817 –0.17634

N –1.38674 –1.76622 0.19930

C –1.79897 –0.62982 –0.44923

N –2.82988 –0.10447 0.16425

C –3.14396 –0.85999 1.24186

C –4.12925 –0.80497 2.26256

N –5.05733 0.20450 2.28109

N –4.14401 –1.75752 3.21305

C –3.24827 –2.74302 3.22603

N –2.31622 –2.84921 2.27300

C –2.21942 –1.93933 1.28135

H –4.13562 3.89286 –3.56660

H –6.10653 4.83983 –2.38475

H 6.88492 2.56521 2.17483

H 7.81682 1.28831 1.44874

H 6.85970 2.07482 –0.47190

H 4.31681 1.54279 1.14441

H 4.26630 2.39859 –0.38752

H 5.81306 –0.20828 –0.54121

H 4.62266 0.46321 –1.66227

H 5.34970 –2.44371 –0.03932

H 5.25791 –1.65065 1.57135

H 4.07783 –2.89491 1.14314

H 3.79352 –2.17407 –1.88702

H 2.53835 –0.89568 –2.01899

H 2.29819 –3.46557 –0.32732

H 1.25053 –2.62869 –2.99832

H 0.71212 –5.09463 –2.51325

H –0.88748 –2.43157 –2.22196

H –1.93338 –4.35899 –1.96805

H –0.24399 –3.44660 0.56574

H –1.32764 –0.20952 –1.32521

H –5.66184 0.21019 3.09067

H –3.28154 –3.48868 4.01270

H –3.46507 1.51196 –0.18787

H –6.57162 4.15776 –0.15496

H –4.94743 1.08205 1.77411

H 6.31476 0.91208 2.08610

**Structure #50.** Optimized geometry coordinates of U:PQ0 (H–edge)

Energy: –648600.1797040 (au)

N –4.97667 –0.87795 0.44265

C –5.30185 0.44485 0.14770

O –6.43789 0.87316 0.17978

N –4.18907 1.20743 –0.18216

C –2.85211 0.79819 –0.23773

O –1.98436 1.61915 –0.53859

C –2.63527 –0.60335 0.07941

C –3.69657 –1.37450 0.40687

N 2.97744 –2.15763 0.01992

C 1.62807 –2.27219 –0.18782

N 0.82361 –1.24454 –0.30183

C 1.45756 –0.03948 –0.19092

C 2.82199 0.19334 0.00997

C 3.70856 –0.92965 0.14222

O 4.91196 –0.96781 0.33530

C 3.00203 1.61953 0.04694

C 4.20499 2.35122 0.22867

N 5.17422 2.97910 0.37530

C 1.74734 2.17425 –0.13322

N 0.82466 1.16792 –0.27639

N 1.11334 –3.55228 –0.22729

H –1.62453 –0.99394 0.04013

H –3.59984 –2.42453 0.65949

H 1.45534 3.21229 –0.16962

H –0.18384 1.29822 –0.41594

H 0.17204 –3.57896 –0.59414

H –5.76179 –1.46243 0.69201

H –4.37448 2.17988 –0.39872

H 1.71236 –4.27043 –0.61149

H 3.54576 –2.98359 0.16232

**Structure #51.** Optimized geometry coordinates of U:H4B (W–edge)

Energy: –794623.5812435 (au)

N –4.65927 –2.12282 –0.09029

C –3.40205 –1.55861 –0.28934

O –2.47423 –2.22067 –0.73869

N –3.31569 –0.23073 0.05982

C –4.34551 0.56007 0.57741

O –4.15385 1.74505 0.85139

C –5.61942 –0.12328 0.75480

C –5.72864 –1.42567 0.41569

N –0.73007 1.04772 –0.32226

C –0.60519 2.34723 –0.14184

N –1.70256 3.12623 0.09485

N 0.60465 2.96968 –0.23314

C 1.82454 2.30705 –0.52547

O 2.88698 2.94289 –0.51783

C 1.65954 0.92152 –0.78953

C 0.40722 0.33784 –0.64924

N 2.77339 0.15529 –1.17914

N 0.27955 –1.01573 –0.78037

C 2.73409 –1.25622 –0.83965

C 1.37898 –1.80950 –1.31901

C 2.98164 –1.59094 0.65184

O 3.07368 –3.02032 0.69052

C 4.25538 –0.94158 1.24603

C 4.02827 0.42008 1.90885

O 5.23661 –0.85883 0.20894

H –6.45190 0.43919 1.15244

H –6.64896 –1.98929 0.51962

H –1.55150 4.00860 0.56016

H 3.65881 0.61456 –1.00734

H 3.52498 –1.76402 –1.39838

H 1.37581 –1.80248 –2.41771

H 1.26412 –2.84072 –0.98046

H 2.11919 –1.25463 1.24682

H 3.06254 –3.29642 1.61569

H 3.25854 0.35341 2.68551

H 4.95172 0.75634 2.39717

H 3.73347 1.18696 1.18882

H –2.56118 2.64054 0.36320

H –0.65565 –1.41180 –0.80320

H –2.38144 0.22340 –0.08263

H –4.73440 –3.09736 –0.34447

H 6.02170 –0.43488 0.57872

H 4.60736 –1.64135 2.02515

H 0.69004 3.96941 –0.10340

**Structure #52.** Optimized geometry coordinates of U:LYA (W–edge)

Energy: –890902.9370460 (au)

N –6.23052 –2.69261 0.11588

C –5.09689 –1.93808 –0.15562

O –4.10474 –2.42086 –0.68853

N –5.21063 –0.61948 0.22437

C –6.34611 0.02993 0.73777

O –6.32855 1.24097 0.93180

C –7.47385 –0.85623 0.98804

C –7.37417 –2.16564 0.67093

C 4.21696 –0.89256 –0.31189

C 5.04286 –0.21420 –1.21899

C 6.39059 0.00049 –0.94181

C 6.95141 –0.46440 0.25598

C 6.13721 –1.16124 1.15676

C 4.78926 –1.36406 0.87796

C 2.74559 –1.08457 –0.60217

C 1.90251 0.15164 –0.23459

C 0.43545 0.00102 –0.52496

C –0.23785 –1.10437 –0.99058

N –1.59212 –0.79739 –1.13993

C –1.76095 0.49272 –0.74906

C –0.55593 1.03288 –0.36025

C –0.51027 2.41142 0.12477

O 0.52172 3.00260 0.41128

N –1.77226 3.04120 0.29086

C –2.86482 2.48541 –0.11026

N –2.98014 1.17950 –0.67277

N –4.07210 3.13531 –0.06290

C 8.39385 –0.27568 0.62249

O 8.94966 –0.96930 1.46593

N 9.07139 0.70883 –0.06158

H –8.37464 –0.43699 1.41316

H –8.18239 –2.87110 0.82639

H 4.62562 0.14154 –2.15773

H 7.01119 0.49846 –1.68121

H 6.58594 –1.53664 2.07017

H 4.16848 –1.90108 1.59082

H 2.37493 –1.95484 –0.04726

H 2.60704 –1.30649 –1.66779

H 2.04082 0.38512 0.82855

H 2.28527 1.03271 –0.76243

H 0.11943 –2.08903 –1.24940

H –2.34664 –1.47109 –1.23654

H –4.00188 4.03275 0.39797

H 8.56345 1.48107 –0.46454

H 9.99607 0.91096 0.29091

H –6.17340 –3.66640 –0.14645

H –4.38437 –0.02952 0.07220

H –4.88059 2.57968 0.21498

H –3.54344 1.17909 –1.52022

**Structure #53.** Optimized geometry coordinates of U:PRF (W–edge)

Energy: –650134.4750884 (au)

N 4.25488 –1.77228 0.03158

C 2.90305 –1.44826 –0.03492

O 2.04556 –2.32151 –0.13314

N 2.64427 –0.10148 0.02016

C 3.58293 0.92737 0.13630

O 3.22107 2.10396 0.17911

C 4.96996 0.48801 0.19934

C 5.25052 –0.83212 0.14439

N –1.82825 2.23659 –0.10683

C –0.49243 1.92342 –0.12237

N –0.06889 0.67529 –0.13506

C –1.06019 –0.26455 –0.15574

C –2.44495 –0.04523 –0.14681

C –2.91413 1.30566 –0.10198

O –4.06128 1.74547 –0.05830

C –3.08792 –1.33497 –0.16434

C –4.57082 –1.60950 –0.17978

N –5.36355 –0.96289 0.87406

C –2.06897 –2.25635 –0.17472

N –0.83967 –1.60345 –0.17476

N 0.40575 2.94676 –0.17335

H 5.74468 1.23625 0.28801

H 6.26067 –1.22362 0.18567

H –4.99345 –1.28509 –1.13913

H –4.72909 –2.69410 –0.12946

H –5.27994 0.04663 0.74757

H –2.11382 –3.33536 –0.19374

H 0.08922 –2.02201 –0.16861

H 0.12494 3.84741 0.18338

H 4.46213 –2.75976 –0.00942

H 1.63480 0.18743 –0.03593

H –4.93917 –1.16758 1.77741

H 1.38463 2.69088 –0.02219

H –2.12230 3.20483 –0.13180

**Structure #54.** Optimized geometry coordinates of U:THF (W–edge)

Energy: –650888.7116509 (au)

N –4.11136 –1.72374 –0.08635

C –2.75956 –1.39354 –0.05663

O –1.89485 –2.26125 –0.09860

N –2.50724 –0.04366 0.02082

C –3.46163 0.97758 0.06294

O –3.11953 2.15815 0.12874

C –4.84705 0.53005 0.02297

C –5.11807 –0.79055 –0.04855

N 0.29387 0.76222 0.05198

C 0.61434 2.03831 0.12589

N –0.33671 2.98204 0.39337

N 1.90301 2.46411 –0.00667

C 3.01299 1.60469 –0.22083

O 4.15239 2.07594 –0.28294

C 2.64363 0.23475 –0.32699

N 3.64607 –0.72377 –0.59908

C 3.37778 –2.06043 –0.06688

C 1.96995 –2.45866 –0.55590

N 0.99009 –1.46484 –0.14445

C 1.32016 –0.13893 –0.15048

C 3.51713 –2.17398 1.46007

H –5.62763 1.27673 0.05387

H –6.12662 –1.18715 –0.07980

H –0.15195 3.92333 0.08023

H 4.09174 –2.74774 –0.53800

H 1.99756 –2.57005 –1.64930

H 1.68280 –3.42412 –0.12812

H 3.34873 –3.20370 1.79580

H 4.52340 –1.87841 1.77503

H 2.79752 –1.52697 1.96894

H 4.56074 –0.34973 –0.36546

H 0.00886 –1.72556 –0.11801

H –1.31186 2.68674 0.31165

H 2.14614 3.43652 0.13136

H –1.49789 0.23770 0.04650

H –4.30771 –2.71262 –0.14328

**Structure #55.** Optimized geometry coordinates of A:SFG (S–edge)

Energy: –1448574.2043582 (au)

O –6.64241 3.39337 –1.36984

C –5.55209 4.17757 –0.89445

C –4.37253 3.27001 –0.60569

O –4.70334 2.37832 0.47879

C –3.93316 2.36138 –1.77291

O –3.05612 2.98647 –2.67593

C –3.28197 1.18574 –1.01659

O –1.96325 1.58798 –0.71762

C –4.13871 1.10452 0.26745

N –5.22451 0.11837 0.16748

C –6.55999 0.34537 –0.12630

N –7.28582 –0.75046 –0.14018

C –6.38484 –1.75374 0.15861

C –6.52554 –3.14964 0.29572

N –7.71109 –3.77345 0.12400

N –5.43908 –3.88960 0.59734

C –4.26867 –3.26182 0.75235

N –3.99723 –1.95277 0.65321

C –5.09920 –1.23883 0.35385

N 4.11525 0.45017 3.39378

C 3.77243 1.79391 2.92099

C 2.28034 2.02813 3.11514

O 1.77518 3.02227 3.58414

O 1.54454 0.99309 2.63208

C 4.12721 2.11790 1.44392

C 5.62742 1.99713 1.14741

C 6.03066 2.26570 –0.31748

N 5.80392 3.68594 –0.62968

C 5.37502 1.31827 –1.35066

C 5.72379 –0.16249 –1.27805

O 5.19965 –0.77039 –0.07004

C 5.11621 –0.99217 –2.43170

O 5.87626 –0.97132 –3.61606

C 4.99862 –2.39253 –1.80205

O 6.20802 –3.13234 –1.99643

C 4.75855 –2.09536 –0.30497

N 3.38708 –2.25107 0.16352

C 2.99113 –3.07674 1.20752

N 1.72429 –2.97743 1.51659

C 1.24614 –2.01961 0.64318

C –0.04263 –1.45755 0.48801

N –1.07753 –1.81154 1.26950

N –0.19998 –0.51589 –0.47165

C 0.85921 –0.16575 –1.22590

N 2.10677 –0.62423 –1.16788

C 2.25043 –1.55079 –0.20522

H –5.22563 4.91018 –1.64738

H –5.82250 4.72078 0.02243

H –3.52010 3.89739 –0.30975

H –4.81504 2.02763 –2.32644

H –2.17832 2.87646 –2.26960

H –3.30525 0.24275 –1.57500

H –1.40202 0.78294 –0.57163

H –3.51956 0.81351 1.12285

H –6.91160 1.34832 –0.32524

H –7.77039 –4.76479 0.28882

H –3.42212 –3.90416 0.98746

H 5.12143 0.31787 3.34024

H 3.69183 –0.24268 2.78078

H 4.27039 2.51851 3.57308

H 3.55673 1.43677 0.80323

H 3.78095 3.13766 1.23123

H 5.96336 0.99116 1.41606

H 6.17937 2.71198 1.76950

H 7.11827 2.11413 –0.37500

H 6.17086 3.89677 –1.55567

H 4.80397 3.87245 –0.68084

H 5.69111 1.64372 –2.35119

H 4.28331 1.41337 –1.32073

H 6.82100 –0.28500 –1.28690

H 4.11485 –0.61072 –2.64720

H 6.46058 –1.74583 –3.57355

H 4.20800 –3.00334 –2.23940

H 6.91285 –2.72195 –1.47402

H 5.34284 –2.80777 0.29284

H –0.91055 –2.55760 1.92864

H –2.04982 –1.62460 1.00078

H 0.65690 0.59683 –1.97413

H 3.70258 –3.73400 1.69071

H –7.37767 3.98423 –1.57207

H –8.54248 –3.23083 –0.04207

H 0.61225 1.23058 2.77090

**Structure #56.** Optimized geometry coordinates of A:SAH (S–edge)

Energy: –1638976.5991194

O 6.57369 –3.33330 –0.41554

C 5.39686 –4.09343 –0.22678

C 4.19922 –3.22115 –0.43549

O 4.25686 –2.09490 0.46814

C 4.12613 –2.61805 –1.81212

O 3.44567 –3.51425 –2.66321

C 3.37066 –1.32715 –1.57777

O 1.99657 –1.66041 –1.45356

C 3.84754 –0.92241 –0.18978

N 4.99489 –0.00405 –0.06080

C 6.30274 –0.38982 0.00094

N 7.13599 0.59514 0.22766

C 6.32346 1.70245 0.35476

C 6.62892 3.05233 0.60293

N 7.86196 3.52633 0.76651

N 5.61375 3.91676 0.69307

C 4.37753 3.43060 0.52551

N 3.95288 2.18615 0.27641

C 4.99610 1.35281 0.20449

N –2.11369 0.77001 2.97890

C –2.48581 –0.63367 3.17634

C –3.70547 –1.09894 2.37033

C –5.03740 –0.37689 2.47654

S –6.30933 –1.57444 2.01201

C –1.35884 –1.62810 2.88859

O –1.56387 –2.82053 3.11677

O –0.26297 –1.28765 2.42569

C –5.55586 –1.58511 0.36775

C –6.04838 –0.47136 –0.56245

O –5.78052 0.84296 –0.06053

C –5.38452 –0.57330 –1.92807

O –6.16014 –1.34168 –2.82104

C –5.20836 0.87190 –2.37581

O –6.31361 1.32167 –3.13328

C –5.19529 1.64610 –1.07246

N –3.83069 2.07531 –0.68760

C –3.49617 3.22095 0.00066

N –2.14655 3.27341 0.13137

C –1.62295 2.17006 –0.44798

C –0.32607 1.71899 –0.59311

N 0.67921 2.42219 –0.10894

N –0.05970 0.54695 –1.25580

C –1.10209 –0.17934 –1.77255

N –2.39783 0.26399 –1.60771

C –2.66122 1.42125 –0.97532

H 5.32563 –4.92193 –0.94798

H 5.36903 –4.52386 0.78527

H 3.28905 –3.80258 –0.24577

H 5.12110 –2.42713 –2.22225

H 2.50249 –3.33360 –2.51838

H 3.54709 –0.55812 –2.33935

H 1.46443 –0.83965 –1.37651

H 3.02338 –0.44135 0.34952

H 6.58567 –1.42339 –0.11399

H 7.98434 4.50768 0.95403

H 3.58958 4.17918 0.60632

H –1.98247 1.07875 2.02337

H –1.40500 1.12853 3.60441

H –2.69942 –0.75010 4.24682

H –3.33608 –1.06091 1.34277

H –3.82140 –2.15415 2.61917

H –5.10416 0.51707 1.86824

H –5.21893 –0.08493 3.51818

H –5.88656 –2.50534 –0.13364

H –4.48083 –1.64685 0.38795

H –7.13575 –0.57342 –0.67776

H –4.39459 –1.02615 –1.83840

H –6.59617 –0.71135 –3.41691

H –4.32665 1.02630 –2.99369

H –7.10483 1.32276 –2.57444

H –5.76627 2.57493 –1.17266

H –4.21154 3.94441 0.35844

H 0.47386 3.29591 0.35150

H –0.91551 –1.10933 –2.29252

H 8.65647 2.90970 0.72401

H 1.65197 2.12740 –0.17394

H 7.33707 –3.92035 –0.36169

H –0.23521 –0.32016 2.29385

**Structure #57.** Optimized geometry coordinates of A:SAM (S–edge)

Energy: –1663932.7559537 (au)

O –6.15349 –3.78949 0.13748

C –4.84305 –4.32488 –0.00899

C –3.73937 –3.31581 0.28397

O –3.79939 –2.25096 –0.68577

C –3.80638 –2.61937 1.65652

O –3.23729 –3.36090 2.70624

C –3.07843 –1.29396 1.37005

O –1.69557 –1.57394 1.47894

C –3.48938 –1.01052 –0.09258

N –4.67718 –0.14258 –0.15942

C –5.98991 –0.51425 –0.41687

N –6.83413 0.49079 –0.37136

C –6.04575 1.58093 –0.06525

C –6.35081 2.94273 0.14203

N –7.60330 3.42459 0.02837

N –5.35192 3.79232 0.46461

C –4.11473 3.30433 0.56698

N –3.68823 2.04350 0.38891

C –4.70373 1.21342 0.07258

N 2.43192 1.35706 –3.23340

C 1.66699 0.12624 –3.10229

C 0.18019 0.29208 –2.68787

O –0.43748 –0.57885 –2.12397

O –0.38842 1.46612 –3.01280

C 2.32696 –0.86409 –2.11156

C 3.76395 –1.14708 –2.52828

S 4.70424 –2.38999 –1.53109

C 3.61428 –3.85137 –1.50510

C 4.64589 –1.84744 0.23442

C 5.64628 –0.73691 0.53278

O 5.33887 0.42063 –0.26148

C 5.58248 –0.31122 2.03116

O 6.57399 –0.91814 2.80987

C 5.71288 1.22982 1.94109

O 7.07655 1.61786 2.06276

C 5.15494 1.58889 0.55031

N 3.77636 2.03973 0.48612

C 3.34543 3.09051 –0.31348

N 2.04340 3.18910 –0.40350

C 1.57004 2.14643 0.37846

C 0.24606 1.70953 0.66722

N –0.83169 2.33128 0.20011

N 0.12084 0.60273 1.44658

C 1.21933 –0.01165 1.89705

N 2.50357 0.30587 1.68495

C 2.61765 1.40947 0.92513

H –4.68730 –5.20165 0.63384

H –4.75446 –4.65172 –1.04984

H –2.76920 –3.82766 0.19837

H –4.85165 –2.41556 1.91229

H –2.29077 –3.14294 2.67982

H –3.38026 –0.48088 2.04014

H –1.19927 –0.72673 1.47095

H –2.68426 –0.52187 –0.65167

H –6.23929 –1.54839 –0.60924

H –7.77709 4.39614 0.22890

H –3.34728 4.02852 0.83532

H 2.40518 1.78224 –4.15149

H 1.64323 –0.34996 –4.09210

H 2.30283 –0.42723 –1.10956

H 1.70876 –1.76367 –2.09059

H 4.38066 –0.24822 –2.47652

H 3.83574 –1.55812 –3.54157

H 4.14355 –4.63646 –0.96270

H 2.66258 –3.62182 –1.02563

H 3.62796 –1.54141 0.48943

H 4.91668 –2.74696 0.79694

H 6.66464 –1.07049 0.29659

H 4.59951 –0.55777 2.43791

H 7.28570 –0.26424 2.91911

H 5.18210 1.73954 2.74577

H 7.55887 1.38702 1.25469

H 5.74762 2.40235 0.12220

H 4.05752 3.74780 –0.79573

H –0.69493 3.11996 –0.41418

H 1.03889 –0.89411 2.50663

H –8.36664 2.79976 –0.17443

H –1.80499 2.01237 0.36195

H 2.27333 2.04172 –2.49914

H –6.43871 –3.91114 1.05136

H 3.46245 –4.16443 –2.53957

H 0.28001 2.04157 –3.41977

**Structure #58.** Optimized geometry coordinates of G:2QB (S–edge)

Energy: –1004475.9216297 (au)

O –5.20774 –1.75128 –0.56394

C –4.29757 –2.84526 –0.57744

C –2.94012 –2.52209 0.03770

O –2.23733 –1.58634 –0.80689

C –2.97301 –1.86964 1.43345

O –3.07805 –2.78498 2.49470

C –1.65535 –1.06903 1.43895

O –0.58930 –1.90078 1.88366

C –1.51805 –0.63940 –0.03780

N –2.03137 0.70136 –0.30571

C –3.34844 1.09542 –0.53778

N –3.48276 2.39504 –0.61512

C –2.20886 2.89476 –0.42393

C –1.73364 4.25328 –0.36297

O –2.31625 5.31679 –0.47382

N –0.31460 4.25916 –0.10049

C 0.50269 3.16794 0.04096

N 1.81835 3.37780 0.31674

N 0.04976 1.92855 –0.04537

C –1.29538 1.86055 –0.23897

N 1.00020 –3.62144 –0.13900

N 1.63213 –3.21477 –1.00155

N 2.17631 –2.79194 –2.02071

C 3.59590 –2.32730 –1.90941

C 3.86210 –1.31772 –0.82595

C 4.89229 –1.48876 0.08487

N 5.21890 –0.60221 1.03656

C 4.47604 0.51096 1.06811

C 4.83911 1.55476 2.08908

N 3.44389 0.78893 0.25785

C 3.10902 –0.11848 –0.68252

N 2.04743 0.17590 –1.47505

H –4.15107 –3.11713 –1.62726

H –4.71003 –3.71948 –0.05615

H –2.36519 –3.46050 0.09553

H –3.82103 –1.17850 1.49036

H –2.16002 –3.00183 2.73304

H –1.67342 –0.21123 2.11333

H –0.28625 –2.48217 1.16736

H –0.46152 –0.62930 –0.32565

H –4.13078 0.36000 –0.66909

H 2.24234 4.24716 0.03198

H 3.79657 –1.91216 –2.90111

H 5.49640 –2.39604 0.04908

H 5.43152 1.10696 2.88748

H 5.44135 2.34266 1.62048

H 1.67668 –0.55863 –2.06105

H 1.37101 0.84755 –1.09886

H 3.94277 2.02400 2.50168

H –5.68565 –1.76068 0.27458

H 0.06076 5.19083 0.02875

H 2.41657 2.54396 0.32035

H 4.25027 –3.19719 –1.77968

**Structure #59.** Optimized geometry coordinates of G:BFT (S–edge)

Energy: –2000454.3551919 (au)

O –5.07275 4.71005 2.50374

C –3.76326 4.90244 1.98624

C –3.55104 3.97821 0.80131

O –3.47906 2.60643 1.24447

C –4.65707 4.01399 –0.27637

O –4.49237 5.03730 –1.22646

C –4.54505 2.59823 –0.87361

O –3.53493 2.58535 –1.88665

C –4.15235 1.73796 0.34425

N –5.28421 1.10656 1.01247

C –6.16959 1.67301 1.92930

N –7.14585 0.86660 2.25673

C –6.91274 –0.28465 1.52961

C –7.66953 –1.50689 1.45034

O –8.69912 –1.85401 2.00110

N –7.03421 –2.40856 0.52410

C –5.87040 –2.19675 –0.17046

N –5.44658 –3.17403 –1.01433

N –5.18051 –1.07193 –0.06989

C –5.75971 –0.16033 0.75831

C –3.10638 –4.59118 –3.74214

N 2.08074 –2.24917 –0.56344

C 2.73505 –3.35284 –0.07532

S 3.67202 –0.22492 1.33266

C 2.96290 0.09362 –0.35749

C 2.81975 –1.17940 –1.24818

C 2.18220 –0.85021 –2.60881

C 3.56403 1.34060 –1.03813

C 4.99120 1.23550 –1.57468

O 5.30070 2.42468 –2.35309

N –0.82437 –4.31611 –2.95397

C –2.10029 –3.94971 –2.82352

N –2.57481 –3.07329 –1.92134

C –1.69316 –2.48496 –1.09137

N –2.18397 –1.55697 –0.21735

C –0.30793 –2.78751 –1.16090

C 0.04398 –3.73271 –2.10680

C 0.66748 –2.10415 –0.22319

P 5.75133 3.77874 –1.61634

O 4.85480 4.40365 –0.62450

O 6.04780 4.70952 –2.89118

O 7.19708 3.34723 –1.01428

O 2.19950 –4.24331 0.56266

C 5.23993 –1.06635 1.03633

O 5.66810 –1.27038 –0.08929

C 5.98461 –1.48266 2.26045

C 7.29531 –1.95344 2.07897

C 8.05375 –2.35383 3.17426

C 7.50995 –2.29437 4.45987

C 6.20464 –1.83446 4.64664

C 5.44233 –1.42949 3.55359

H –3.62050 5.93340 1.62901

H –2.99533 4.68980 2.74348

H –2.59260 4.25962 0.33594

H –5.62791 4.15083 0.20716

H –3.93878 4.65265 –1.92677

H –5.45935 2.24818 –1.35427

H –2.66540 2.56421 –1.46260

H –3.48671 0.92837 0.02604

H –5.99816 2.66619 2.32055

H –4.50298 –3.07354 –1.40943

H –3.81894 –3.85145 –4.11681

H –2.59446 –5.07275 –4.57565

H –3.67828 –5.35772 –3.20516

H 3.80947 –3.35613 –0.33214

H 3.81911 –1.57930 –1.42636

H 2.05037 –1.76903 –3.18413

H 2.81700 –0.17880 –3.19147

H 1.20042 –0.37729 –2.50220

H 2.91406 1.61481 –1.87646

H 3.52005 2.17715 –0.33541

H 5.11764 0.40506 –2.27027

H 5.72969 1.11727 –0.78059

H –3.19889 –1.42500 –0.18075

H 1.08218 –4.03776 –2.20680

H 0.42529 –1.03603 –0.18355

H 0.54151 –2.50586 0.79059

H 7.69731 –1.99457 1.07285

H 9.06742 –2.71374 3.02731

H 8.10090 –2.60911 5.31487

H 5.77785 –1.79600 5.64390

H 4.42459 –1.08798 3.70980

H –5.17136 5.23838 3.30473

H –7.55868 –3.26277 0.37993

H –5.76152 –4.11782 –0.84971

H –1.68159 –1.38841 0.63990

H 7.38026 3.85387 –0.20970

H 6.50939 4.23469 –3.59753

H 1.95112 0.39438 –0.05975

**Structure #60.** Optimized geometry coordinates of G:D2X (S–edge)

Energy: –2104605.0032526 (au)

O –0.07538 5.50818 –0.04104

C 0.80242 4.97051 0.93313

C 0.52253 3.48810 1.02382

O 0.80015 2.83746 –0.26634

C 1.35795 2.71215 2.05924

O 0.77983 2.69075 3.33638

C 1.45147 1.31324 1.40979

O 0.24958 0.60761 1.69787

C 1.58108 1.65268 –0.08087

N 2.96934 1.92946 –0.46526

C 3.48582 3.13415 –0.94608

N 4.77385 3.09204 –1.15061

C 5.14282 1.81086 –0.80690

C 6.45098 1.20335 –0.79503

O 7.54125 1.64591 –1.08692

N 6.34633 –0.15943 –0.32782

C 5.20861 –0.83025 0.01304

N 5.31510 –2.11772 0.41353

N 4.01004 –0.24977 –0.01226

C 4.04228 1.06567 –0.39601

O –1.52971 2.69629 –1.55649

P –2.22673 1.35128 –1.15387

O –3.05739 0.83714 –2.39524

O –1.33406 0.31168 –0.55614

O –3.36774 1.80809 –0.04131

P –4.97465 1.54971 –0.12638

O –5.56470 2.57563 0.93502

O –5.46478 1.60700 –1.52468

O –5.21055 0.13362 0.56337

C –4.59851 –0.29629 1.80337

C –4.52193 –1.82889 1.77123

C –3.71549 –2.33667 0.60637

C –2.35388 –2.44317 0.49065

C –1.34647 –2.23698 1.57613

S –4.49849 –2.72987 –0.90176

C –3.00079 –3.00842 –1.63109

N –1.97772 –2.81258 –0.80695

C –0.58369 –2.73794 –1.35069

C 0.46320 –3.52908 –0.61880

C 0.38843 –4.88525 –0.34101

N 1.35948 –5.57257 0.27540

C 2.46198 –4.88454 0.59498

C 3.58182 –5.63369 1.25823

N 2.65887 –3.57239 0.35421

C 1.67239 –2.89111 –0.23889

O 1.80612 –1.60234 –0.49090

H 0.63125 5.39467 1.93481

H 1.85933 5.13327 0.67560

H –0.54397 3.34345 1.23283

H 2.35553 3.15507 2.15376

H 0.11514 1.98232 3.30503

H 2.29537 0.72803 1.77957

H –0.34031 0.60457 0.91554

H 1.17519 0.86702 –0.72184

H 2.83821 3.97490 –1.13704

H 4.45182 –2.65819 0.51679

H –5.70179 3.47178 0.58948

H –5.22242 0.03846 2.63608

H –3.60182 0.14391 1.89188

H –5.53619 –2.23742 1.73656

H –4.07948 –2.17061 2.71218

H –1.83030 –1.80486 2.45266

H –0.89903 –3.18947 1.87461

H –0.54783 –1.55601 1.27875

H –2.87289 –3.27787 –2.66982

H –0.66546 –3.05841 –2.39299

H –0.32999 –1.67666 –1.34173

H –0.49902 –5.45750 –0.61299

H 3.22905 –6.60402 1.60661

H 3.98969 –5.06110 2.09563

H 4.39581 –5.80081 0.54288

H 0.10577 6.45197 –0.13574

H 6.16071 –2.62814 0.21301

H 7.24461 –0.62368 –0.25929

H 2.70650 –1.18000 –0.21493

H –3.99557 1.16515 –2.42016

H –0.61766 2.82721 –1.16380

**Structure #61.** Optimized geometry coordinates of G:EEM (S–edge)

Energy: –2966926.0045106 (au)

O –9.12237 –1.49567 –0.56968

C –8.34949 –2.66402 –0.79301

C –6.88007 –2.46977 –0.43566

O –6.35429 –1.34150 –1.16923

C –6.59313 –2.14910 1.04392

O –6.56056 –3.27209 1.88608

C –5.25502 –1.39840 0.93370

O –4.16221 –2.33253 0.87904

C –5.40925 –0.62141 –0.39049

N –5.84898 0.75675 –0.21069

C –7.14991 1.23788 –0.06499

N –7.20443 2.54036 0.01653

C –5.89227 2.95466 –0.07363

C –5.33721 4.28388 –0.05948

O –5.85967 5.37560 0.04501

N –3.90211 4.20478 –0.19708

C –3.14306 3.07051 –0.28849

N –1.78738 3.22321 –0.31656

N –3.67192 1.85866 –0.29996

C –5.03370 1.86680 –0.20394

C 1.30664 0.65734 –0.73837

N 2.17964 –0.35648 –0.63793

C 1.56459 –1.49077 –0.23382

C 3.43420 –3.23921 –0.32106

C 3.99405 –2.91190 –1.73542

C 5.50100 –2.70153 –1.45385

C 5.49537 –2.08242 –0.05216

C 5.33747 –0.55678 –0.06903

O 7.08300 4.13008 –1.56516

C 6.55200 3.29725 –0.68276

O 7.02736 2.20517 –0.43338

C 5.28320 3.84873 0.02033

N 4.70702 4.89098 –0.83009

C 4.32780 2.69823 0.41799

C 4.90493 1.85797 1.56879

Se 4.30772 –0.02771 1.52000

C 5.57139 –0.67437 2.87485

O 4.37177 –2.69037 0.62994

O 6.18755 –3.94397 –1.50477

O 3.73736 –3.91585 –2.67190

N 2.09849 –2.76075 –0.06391

C 1.03768 –3.55625 0.36136

N –0.09392 –2.91561 0.46393

C 0.21695 –1.62114 0.09521

N 0.00060 0.67769 –0.46817

C –0.59746 –0.46461 –0.02501

N –1.89378 –0.45687 0.26944

H –8.75048 –3.45162 –0.14658

H –8.43557 –3.00595 –1.83261

H –6.33608 –3.38753 –0.71876

H –7.37049 –1.47277 1.41433

H –5.64942 –3.60447 1.87730

H –5.03899 –0.74690 1.78084

H –4.22660 –2.84589 0.05939

H –4.45153 –0.56838 –0.92002

H –7.99184 0.56275 –0.02810

H –1.41902 4.09824 –0.65566

H 1.72102 1.60118 –1.08837

H 3.39704 –4.32507 –0.18753

H 3.53735 –1.98447 –2.09288

H 5.97887 –2.06326 –2.20084

H 6.39912 –2.36239 0.49755

H 6.27889 –0.00469 –0.07669

H 4.69527 –0.22973 –0.88681

H 5.64289 4.34628 0.93103

H 6.46214 4.89605 –1.61926

H 4.20051 5.59220 –0.29987

H 4.14456 2.08220 –0.46830

H 3.36335 3.11973 0.71665

H 5.99108 1.80940 1.51949

H 4.57349 2.22396 2.54352

H 6.58586 –0.38362 2.60330

H 5.27753 –0.23859 3.83006

H 5.45109 –1.75638 2.91456

H 6.02789 –4.44175 –0.68946

H 4.50943 –4.50730 –2.66410

H 1.18572 –4.60890 0.56435

H –2.46908 0.37774 0.09317

H –8.98272 –0.91195 –1.32688

H –3.45255 5.11077 –0.14242

H –1.22304 2.39201 –0.50004

H –2.35516 –1.29927 0.59952

H 4.08069 4.51090 –1.53571

**Structure #62.** Optimized geometry coordinates of 2G:SAM (S–edge)

Energy: –1711141.3262374 (au)

O –9.18430 –1.02445 0.29999

C –8.52825 –2.27942 0.22250

C –7.01521 –2.15282 0.36415

O –6.52425 –1.22735 –0.63030

C –6.52291 –1.58838 1.71071

O –6.44059 –2.53684 2.74302

C –5.17279 –0.97250 1.30599

O –4.14157 –1.97518 1.32229

C –5.44515 –0.45418 –0.12226

N –5.77039 0.96407 –0.17680

C –6.99329 1.58381 0.08063

N –6.95409 2.87765 –0.09400

C –5.65589 3.14294 –0.47746

C –5.02954 4.39126 –0.83054

O –5.46238 5.52564 –0.87814

N –3.65122 4.15204 –1.18557

C –2.99070 2.95349 –1.17367

N –1.68535 2.95044 –1.56290

N –3.58095 1.81943 –0.83204

C –4.90234 1.97381 –0.52903

N 7.71895 4.30818 –0.73638

C 6.68227 3.66368 0.06718

C 7.12197 3.70342 1.55386

O 7.99096 4.66214 1.83526

O 6.69037 2.93063 2.38797

C 6.30116 2.22125 –0.35073

C 4.98777 1.76128 0.30931

S 4.85499 0.01165 0.86355

C 6.30856 –0.21919 1.94061

C 5.26434 –0.95225 –0.64727

C 5.38990 –2.44356 –0.30183

O 4.34229 –2.84563 0.59006

C 5.25278 –3.35057 –1.53347

O 5.92228 –4.59106 –1.36240

C 3.72362 –3.56579 –1.62237

O 3.36504 –4.75038 –2.27129

C 3.29049 –3.53032 –0.12713

N 2.00668 –2.92526 0.12188

C 0.96188 –3.53193 0.81530

N –0.13151 –2.82224 0.84835

C 0.18930 –1.67451 0.14830

C –0.58841 –0.53495 –0.18525

N –1.85601 –0.38491 0.18893

N 0.01333 0.43719 –0.92747

C 1.28597 0.27555 –1.29405

N 2.11956 –0.74234 –1.03093

C 1.50411 –1.70602 –0.31177

H –8.89539 –2.89277 1.05176

H –8.77060 –2.79884 –0.71402

H –6.56858 –3.14918 0.20382

H –7.21013 –0.79935 2.03313

H –5.55395 –2.92736 2.69613

H –4.82442 –0.18745 1.97772

H –4.31937 –2.62358 0.62425

H –4.55993 –0.58507 –0.75453

H –7.85628 1.00913 0.38361

H –1.17362 3.81736 –1.50973

H 8.22266 5.08125 0.97274

H 7.35699 4.72183 –1.58914

H 5.79039 4.30131 0.00298

H 7.13572 1.56344 –0.08473

H 6.19887 2.18534 –1.43938

H 4.80507 2.30334 1.23862

H 4.12011 1.88372 –0.34516

H 7.22908 –0.26872 1.35798

H 6.14367 –1.14943 2.48545

H 6.34282 0.63489 2.61966

H 6.18407 –0.55995 –1.08937

H 4.39374 –0.76566 –1.28523

H 6.34480 –2.63203 0.20114

H 5.66446 –2.91198 –2.44573

H 5.79591 –4.90552 –0.45470

H 3.25201 –2.73117 –2.14899

H 4.12623 –5.35108 –2.20138

H 3.22144 –4.55282 0.25711

H 1.09074 –4.51047 1.25932

H –2.41342 0.40720 –0.15801

H 1.70208 1.08304 –1.89483

H –9.06567 –0.58926 –0.55483

H –3.17545 4.98894 –1.50053

H –1.14460 2.09747 –1.40473

H –2.32561 –1.10951 0.72367

H 8.47252 3.67178 –0.98451

**Structure #63.** Optimized geometry coordinates of G:TPP (S–edge)

Energy: –2092112.5739857 (au)

O 8.13696 3.97087 –1.60121

C 7.22776 4.58170 –0.69543

C 6.63441 3.60795 0.31759

O 5.74881 2.67553 –0.34825

C 7.64561 2.73372 1.08723

O 8.21341 3.36446 2.20646

C 6.78882 1.50094 1.42637

O 6.02685 1.74666 2.60912

C 5.89126 1.36692 0.17927

N 6.43072 0.47194 –0.84015

C 7.40788 0.75928 –1.79584

N 7.80804 –0.30240 –2.44488

C 7.08292 –1.34371 –1.90372

C 7.13677 –2.75581 –2.18535

O 7.80459 –3.39500 –2.97352

N 6.21737 –3.45474 –1.31805

C 5.36542 –2.90026 –0.40351

N 4.56543 –3.73840 0.31008

N 5.31398 –1.59609 –0.17495

C 6.21614 –0.88640 –0.91587

N –0.04645 –2.69044 2.61594

C 1.22991 –3.04470 2.39090

C 1.73401 –4.26613 3.10526

N 2.07792 –2.41388 1.57002

C 1.64662 –1.31706 0.91119

N 2.54479 –0.68380 0.12933

C 0.29510 –0.88652 1.05596

C –0.48202 –1.62580 1.93772

C –0.20352 0.32463 0.30333

N –1.68353 0.40714 0.24783

C –2.37795 1.17576 1.07936

S –4.04939 1.06504 0.84469

C –3.81074 –0.10199 –0.44418

C –2.47420 –0.34328 –0.63297

C –1.82470 –1.25731 –1.62566

C –4.98148 –0.73492 –1.14797

C –6.04213 0.25937 –1.63094

O –6.51649 1.03225 –0.50904

P –7.85799 0.67904 0.30758

O –7.84211 –0.91818 0.34215

O –7.97172 1.43644 1.56050

O –9.02249 1.03107 –0.81181

P –10.52368 0.41761 –0.68801

O –11.48241 1.57471 –0.15163

O –10.51593 –0.83103 0.12108

O –10.87666 0.35608 –2.23607

H 6.41334 5.00478 –1.29256

H 7.69861 5.40238 –0.13945

H 6.05083 4.20283 1.04012

H 8.45622 2.44287 0.41109

H 7.64511 3.14042 2.96152

H 7.36741 0.59836 1.62591

H 5.37662 2.43855 2.42007

H 4.91504 0.96490 0.47209

H 7.73643 1.77633 –1.96296

H 4.37891 –4.65876 –0.05671

H 2.82152 –4.25073 3.19156

H 1.44246 –5.16688 2.55177

H 1.27885 –4.33456 4.09486

H 2.31877 0.16787 –0.35584

H –1.52355 –1.35669 2.11244

H 0.14021 1.26643 0.74659

H –1.90732 1.81452 1.81432

H –1.13906 –1.95074 –1.13079

H –1.26118 –0.69388 –2.37763

H –2.57538 –1.84707 –2.15012

H –4.61638 –1.29708 –2.01211

H –5.46589 –1.45344 –0.47693

H –6.86340 –0.27697 –2.11098

H –5.62937 0.98184 –2.33877

H 0.14750 0.31754 –0.73371

H 3.52710 –1.00779 0.09382

H 6.26543 –4.46154 –1.42043

H 3.82350 –3.30987 0.86467

H 9.03543 4.08404 –1.26754

H –8.77043 –1.25834 0.42167

H –11.60464 1.54921 0.81069

H –11.82310 0.25653 –2.41970

**Structure #64.** Optimized geometry coordinates of G:TPS (S–edge)

Energy: –1735853.8235357 (au)

O 5.34380 4.94130 –1.05438

C 4.02785 5.27866 –0.64591

C 3.45503 4.14398 0.18382

O 3.22958 2.97234 –0.63767

C 4.33660 3.66367 1.35842

O 4.19407 4.43352 2.52548

C 3.86369 2.20708 1.51199

O 2.67650 2.15911 2.30885

C 3.58671 1.78757 0.05494

N 4.72789 1.14951 –0.59817

C 5.77740 1.76712 –1.28085

N 6.72304 0.92998 –1.61851

C 6.30293 –0.29261 –1.13806

C 6.96299 –1.57309 –1.16142

O 8.02827 –1.92199 –1.62928

N 6.15245 –2.54493 –0.46444

C 4.92108 –2.34111 0.09260

N 4.32198 –3.39396 0.71270

N 4.31353 –1.16368 0.07335

C 5.06644 –0.18220 –0.50905

C 1.21920 –4.83077 2.84994

N –2.83331 –1.80191 –1.15437

C –3.57591 –2.59146 –1.92200

S –5.22676 –2.46829 –1.57176

C –4.90698 –1.28892 –0.31989

C –3.56113 –1.04225 –0.22950

C –2.86171 –0.09203 0.69076

C –6.03478 –0.66943 0.45250

C –6.67241 0.52700 –0.27181

O –7.66309 1.03893 0.61784

N –0.74826 –4.32207 1.52107

C 0.54031 –4.03382 1.77347

N 1.27075 –3.11718 1.12689

C 0.68564 –2.39055 0.15272

N 1.44488 –1.44910 –0.45395

C –0.68422 –2.61059 –0.17188

C –1.32431 –3.60925 0.55119

C –1.35061 –1.78716 –1.24747

P –8.64749 2.24622 0.18942

O –7.55925 3.31098 –0.33648

O –9.58328 2.64803 1.24883

O –9.33281 1.73905 –1.18639

H 3.37011 5.45873 –1.50875

H 4.01841 6.17745 –0.01191

H 2.48799 4.49365 0.58130

H 5.38602 3.69583 1.05310

H 3.49361 4.00887 3.04684

H 4.58221 1.55427 2.00828

H 1.96532 2.60220 1.82407

H 2.75752 1.07146 0.02891

H 5.75168 2.82713 –1.49029

H 4.61043 –4.33031 0.47602

H 0.52268 –5.02722 3.66719

H 1.52830 –5.80400 2.45028

H 2.10297 –4.31223 3.22395

H –3.15625 –3.24369 –2.67551

H –2.07607 –0.59763 1.25928

H –2.40771 0.73564 0.13482

H –3.57122 0.33734 1.39786

H –6.81025 –1.41370 0.65865

H –5.66533 –0.33213 1.42488

H –7.13405 0.21501 –1.21660

H –5.92450 1.29800 –0.48679

H 1.18792 –1.08459 –1.35707

H –2.37062 –3.84671 0.35820

H –1.10644 –2.12873 –2.26010

H –1.04084 –0.73921 –1.18236

H 2.44120 –1.34994 –0.18623

H –7.94576 4.18483 –0.49534

H –10.27377 1.55674 –1.04247

H 5.73405 5.69361 –1.51581

H 3.35380 –3.26999 1.00686

H 6.60493 –3.44730 –0.37769

**Structure #65.** Optimized geometry coordinates of A:SAM (S–edge)

Energy: –1663932.7559537 (au)

O –6.15349 –3.78949 0.13748

C –4.84305 –4.32488 –0.00899

C –3.73937 –3.31581 0.28397

O –3.79939 –2.25096 –0.68577

C –3.80638 –2.61937 1.65652

O –3.23729 –3.36090 2.70624

C –3.07843 –1.29396 1.37005

O –1.69557 –1.57394 1.47894

C –3.48938 –1.01052 –0.09258

N –4.67718 –0.14258 –0.15942

C –5.98991 –0.51425 –0.41687

N –6.83413 0.49079 –0.37136

C –6.04575 1.58093 –0.06525

C –6.35081 2.94273 0.14203

N –7.60330 3.42459 0.02837

N –5.35192 3.79232 0.46461

C –4.11473 3.30433 0.56698

N –3.68823 2.04350 0.38891

C –4.70373 1.21342 0.07258

N 2.43192 1.35706 –3.23340

C 1.66699 0.12624 –3.10229

C 0.18019 0.29208 –2.68787

O –0.43748 –0.57885 –2.12397

O –0.38842 1.46612 –3.01280

C 2.32696 –0.86409 –2.11156

C 3.76395 –1.14708 –2.52828

S 4.70424 –2.38999 –1.53109

C 3.61428 –3.85137 –1.50510

C 4.64589 –1.84744 0.23442

C 5.64628 –0.73691 0.53278

O 5.33887 0.42063 –0.26148

C 5.58248 –0.31122 2.03116

O 6.57399 –0.91814 2.80987

C 5.71288 1.22982 1.94109

O 7.07655 1.61786 2.06276

C 5.15494 1.58889 0.55031

N 3.77636 2.03973 0.48612

C 3.34543 3.09051 –0.31348

N 2.04340 3.18910 –0.40350

C 1.57004 2.14643 0.37846

C 0.24606 1.70953 0.66722

N –0.83169 2.33128 0.20011

N 0.12084 0.60273 1.44658

C 1.21933 –0.01165 1.89705

N 2.50357 0.30587 1.68495

C 2.61765 1.40947 0.92513

H –4.68730 –5.20165 0.63384

H –4.75446 –4.65172 –1.04984

H –2.76920 –3.82766 0.19837

H –4.85165 –2.41556 1.91229

H –2.29077 –3.14294 2.67982

H –3.38026 –0.48088 2.04014

H –1.19927 –0.72673 1.47095

H –2.68426 –0.52187 –0.65167

H –6.23929 –1.54839 –0.60924

H –7.77709 4.39614 0.22890

H –3.34728 4.02852 0.83532

H 2.40518 1.78224 –4.15149

H 1.64323 –0.34996 –4.09210

H 2.30283 –0.42723 –1.10956

H 1.70876 –1.76367 –2.09059

H 4.38066 –0.24822 –2.47652

H 3.83574 –1.55812 –3.54157

H 4.14355 –4.63646 –0.96270

H 2.66258 –3.62182 –1.02563

H 3.62796 –1.54141 0.48943

H 4.91668 –2.74696 0.79694

H 6.66464 –1.07049 0.29659

H 4.59951 –0.55777 2.43791

H 7.28570 –0.26424 2.91911

H 5.18210 1.73954 2.74577

H 7.55887 1.38702 1.25469

H 5.74762 2.40235 0.12220

H 4.05752 3.74780 –0.79573

H –0.69493 3.11996 –0.41418

H 1.03889 –0.89411 2.50663

H –8.36664 2.79976 –0.17443

H –1.80499 2.01237 0.36195

H 2.27333 2.04172 –2.49914

H –6.43871 –3.91114 1.05136

H 3.46245 –4.16443 –2.53957

H 0.28001 2.04157 –3.41977

**Structure #66.** Optimized geometry coordinates of G:SAH (S–edge)

Energy: –1686163.9360389 (au)

O 5.02180 4.11873 –1.10652

C 3.74558 4.70739 –0.90411

C 2.75465 3.68237 –0.43012

O 2.75318 2.55024 –1.33532

C 3.05913 3.03485 0.91817

O 2.70660 3.84336 2.01375

C 2.22210 1.76985 0.84810

O 0.83853 2.08321 0.96614

C 2.50403 1.36590 –0.59898

N 3.67718 0.47710 –0.69232

C 4.92346 0.72128 –1.21807

N 5.71985 –0.31770 –1.14140

C 4.94956 –1.28795 –0.52299

C 5.24500 –2.61720 –0.17305

O 6.29224 –3.25446 –0.33589

N 4.15850 –3.23236 0.42124

C 2.94441 –2.64400 0.65994

N 2.00679 –3.39995 1.26261

N 2.65545 –1.40278 0.32856

C 3.70172 –0.80601 –0.25084

N 0.18699 –0.25359 1.45698

C –0.68012 –0.37214 2.63251

C –2.10758 0.15553 2.43935

C –2.36148 1.57816 1.97230

S –4.01538 2.02153 2.55179

C –0.80373 –1.79530 3.18054

O –1.44189 –1.96435 4.21997

O –0.30483 –2.77838 2.61870

C –4.63667 0.71930 1.46111

C –4.86018 1.16032 0.01065

O –3.66407 1.61683 –0.63124

C –5.40766 0.01299 –0.82595

O –6.81784 0.02240 –0.85181

C –4.78032 0.20914 –2.20003

O –5.60214 0.99278 –3.04154

C –3.52605 1.00780 –1.90462

N –2.30240 0.17513 –1.96583

C –1.04836 0.58992 –2.35759

N –0.20269 –0.47014 –2.30849

C –0.89790 –1.54520 –1.87478

C –0.53539 –2.85579 –1.63527

N 0.70825 –3.24731 –1.83441

N –1.46087 –3.77400 –1.20656

C –2.75856 –3.37287 –1.01256

N –3.11211 –2.05812 –1.23257

C –2.21210 –1.16028 –1.67115

H 3.37427 5.15672 –1.83824

H 3.77136 5.50042 –0.14092

H 1.76623 4.17171 –0.40595

H 4.12504 2.80244 0.98374

H 1.75597 3.71649 2.15427

H 2.44601 1.00775 1.58790

H 0.57550 2.63985 0.21852

H 1.65992 0.82285 –1.04050

H 5.17290 1.68697 –1.63245

H 1.11133 –2.99066 1.54139

H 0.18377 0.66723 1.07965

H 1.09369 –0.69167 1.51058

H –0.26277 0.19262 3.50682

H –2.51325 –0.55137 1.71530

H –2.65890 0.01562 3.37443

H –2.28946 1.69404 0.89662

H –1.64429 2.26240 2.44221

H –5.64405 0.45675 1.81202

H –4.06827 –0.19403 1.51289

H –5.58306 1.98743 0.00930

H –5.06290 –0.94670 –0.43329

H –7.07105 0.37289 –1.72142

H –4.59680 –0.72635 –2.72313

H –5.67661 1.88612 –2.67497

H –3.38149 1.78641 –2.66089

H –0.81684 1.59013 –2.68920

H –3.50499 –4.07744 –0.67147

H 5.67417 4.82529 –1.17981

H 4.31816 –4.19899 0.67676

H 2.26793 –4.25199 1.73203

H –1.77340 –1.14062 4.60948

H 1.42057 –2.53735 –1.91878

H 0.97884 –4.14467 –1.46151

**Structure #67.** Optimized geometry coordinates of G:SAM (W–edge)

Energy: –1399444.6204553 (au)

N –8.27926 0.35672 1.62499

C –8.76434 –0.92141 1.50541

N –7.97973 –1.70760 0.82022

C –6.91211 –0.90270 0.45206

C –5.73501 –1.20827 –0.29406

O –5.38158 –2.29415 –0.78964

N –4.92538 –0.08902 –0.44174

C –5.19246 1.15743 0.05672

N –4.28293 2.10811 –0.21254

N –6.27187 1.45239 0.76292

C –7.08469 0.38139 0.92181

N 0.58647 0.77279 –2.31719

C –0.35082 –0.33593 –2.10527

C –1.57114 0.16870 –1.36438

O –2.44432 –0.61139 –1.01544

O –1.67643 1.34928 –1.08146

C 0.29364 –1.46435 –1.28873

C 1.68380 –1.78886 –1.81699

S 2.44038 –3.25498 –1.01608

C 1.01430 –4.18859 –0.37247

C 2.92347 –2.40700 0.48602

C 4.35852 –1.95153 0.48986

O 4.50487 –0.94543 –0.52664

C 4.47533 –1.25740 1.78686

O 5.04711 –2.13869 2.75217

C 5.43337 –0.14964 1.47517

O 6.79352 –0.60025 1.64337

C 5.18263 0.22979 –0.01520

N 4.26427 1.37453 –0.28438

C 4.40591 2.23471 –1.34819

N 3.48373 3.15069 –1.34999

C 2.67104 2.95119 –0.30571

C 1.50751 3.60580 0.19731

N 0.99007 4.72147 –0.42898

N 0.91558 3.10326 1.30145

C 1.38753 1.99208 1.91825

N 2.51480 1.37569 1.50554

C 3.16195 1.79606 0.40645

H –9.70359 –1.21405 1.95711

H –3.33206 1.84648 –0.50389

H –0.68827 –0.76351 –3.05924

H 0.35264 –1.13828 –0.24299

H –0.39292 –2.31056 –1.33055

H 2.39543 –0.97647 –1.66696

H 1.65701 –2.02623 –2.88557

H 0.41905 –3.56635 0.29272

H 0.41182 –4.53373 –1.21356

H 1.42462 –5.05078 0.15756

H 2.25387 –1.55724 0.62233

H 2.78842 –3.11052 1.31422

H 5.07977 –2.76711 0.37135

H 3.53338 –0.83778 2.14685

H 5.98620 –1.89362 2.80637

H 5.33096 0.70791 2.14135

H 7.03001 –1.19587 0.91691

H 6.10797 0.42345 –0.56139

H 5.20812 2.12923 –2.06537

H 1.30187 4.89814 –1.37203

H 0.86711 1.61368 2.78935

H –4.39898 2.95865 0.31554

H –3.96201 –0.28133 –0.79627

H –8.71052 1.15021 2.07210

H 0.03191 4.94721 –0.20287

H 0.64835 0.99772 –3.30592

H 0.12760 1.57328 –1.87019

**Structure #68.** Optimized geometry coordinates of G:LYS (S–edge)

Energy: –963767.0108542 (au)

O 4.10119 3.08934 –0.49485

C 2.89195 3.83253 –0.50761

C 1.66380 3.08382 –0.00018

O 1.27561 2.03414 –0.91761

C 1.76642 2.41322 1.38329

O 1.52131 3.29060 2.45511

C 0.70855 1.29625 1.25524

O –0.57625 1.83059 1.55252

C 0.87422 0.86163 –0.21293

N 1.89628 –0.18270 –0.38192

C 3.23282 –0.00240 –0.73580

N 3.90438 –1.12359 –0.79354

C 2.98493 –2.09863 –0.47060

C 3.15505 –3.52355 –0.36290

O 4.13629 –4.23119 –0.51656

N 1.90364 –4.13064 –0.00738

C 0.70980 –3.48815 0.20421

N –0.35829 –4.26595 0.56203

N 0.57413 –2.18033 0.11941

C 1.73099 –1.54237 –0.21345

N –2.15745 –0.66430 0.49355

C –3.59255 –0.88352 0.48451

C –3.93386 –2.34020 0.21469

O –3.13913 –3.25890 0.12595

C –4.26128 0.06292 –0.54852

C –3.95198 1.52691 –0.19126

C –3.76437 2.45472 –1.39756

C –3.03581 3.75215 –1.03993

N –1.63317 3.49781 –0.63375

O –5.25969 –2.54427 0.08879

H –3.82941 –0.17908 –1.52697

H –5.33839 –0.12140 –0.60723

H –3.01940 1.54693 0.37541

H –4.73393 1.92836 0.46721

H –3.18413 1.93312 –2.17182

H –4.72826 2.70597 –1.85786

H –3.53724 4.24130 –0.19614

H –3.09059 4.44770 –1.89099

H –1.11171 3.11170 –1.42098

H –1.19316 4.39281 –0.42968

H –4.04671 –0.67105 1.46697

H 2.72153 4.11642 –1.55081

H 2.98180 4.75663 0.08147

H 0.85115 3.82253 0.05415

H 2.76006 1.97159 1.51869

H 0.55884 3.24081 2.59435

H 0.87623 0.46722 1.94582

H –0.94418 2.34632 0.78995

H –0.06785 0.47911 –0.61662

H 3.62688 0.98284 –0.93700

H –0.34037 –5.23261 0.27191

H 4.44883 3.07710 0.40612

H –1.26881 –3.82354 0.46952

H 1.96879 –5.13304 0.12059

H –1.83630 –0.17666 1.32104

H –1.59757 –1.50119 0.36696

H –5.37963 –3.49660 –0.06701

**Structure #69.** Optimized geometry coordinates of G:SAM (S–edge)

Energy: –1711146.3317487 (au)

O 5.96113 2.17106 1.57895

C 5.31024 3.40157 1.32326

C 4.07383 3.24200 0.44055

O 4.47482 2.85750 –0.89859

C 3.10993 2.13688 0.91001

O 2.01191 2.60712 1.70327

C 2.59781 1.52770 –0.40522

O 1.53325 2.35643 –0.85974

C 3.82566 1.66980 –1.31016

N 4.76728 0.53720 –1.18244

C 6.11564 0.64908 –1.51382

N 6.80078 –0.44064 –1.28893

C 5.87566 –1.33089 –0.79130

C 6.06667 –2.68295 –0.32779

O 7.05614 –3.38570 –0.29260

N 4.81802 –3.20086 0.17713

C 3.61632 –2.55212 0.19830

N 2.52778 –3.23582 0.68607

N 3.45090 –1.33349 –0.27851

C 4.60710 –0.75635 –0.72142

N –1.08963 1.65467 1.91292

C –1.07026 0.34670 2.56711

C 0.14386 –0.54273 2.21009

O 1.33271 0.04532 2.18148

O 0.03202 –1.73535 1.98681

C –2.37864 –0.43186 2.29644

C –3.56692 0.41999 2.72886

S –5.25630 –0.31806 2.59853

C –5.09942 –1.94884 3.39801

C –5.53491 –0.79151 0.83570

C –5.82378 0.41191 –0.05494

O –4.67239 1.27299 –0.09897

C –6.14000 –0.03285 –1.51585

O –7.51271 –0.04716 –1.78903

C –5.34587 0.99844 –2.35905

O –6.18128 2.09070 –2.72277

C –4.20180 1.46209 –1.43618

N –2.90564 0.82776 –1.62337

C –1.70867 1.51443 –1.62646

N –0.65419 0.73531 –1.63547

C –1.16831 –0.55680 –1.63550

C –0.57282 –1.84892 –1.62815

N 0.74433 –2.08560 –1.63034

N –1.39957 –2.92119 –1.63239

C –2.71471 –2.73404 –1.60828

N –3.39419 –1.57305 –1.57688

C –2.56568 –0.52158 –1.61590

H 5.98470 4.13919 0.86776

H 4.99157 3.79777 2.29397

H 3.54486 4.20219 0.37202

H 3.65229 1.39833 1.50207

H 1.42595 3.01015 1.03401

H 2.27946 0.49572 –0.27699

H 0.87962 1.77494 –1.30287

H 3.54994 1.78578 –2.36229

H 6.50820 1.57052 –1.91961

H 1.77815 –2.65312 1.05548

H –0.99783 0.52725 3.64868

H –2.44030 –0.66563 1.22996

H –2.32631 –1.38106 2.83433

H –3.63128 1.33506 2.13754

H –3.51837 0.69711 3.78797

H –4.37416 –2.57211 2.87454

H –4.79245 –1.77821 4.43138

H –6.08861 –2.40944 3.38516

H –4.67724 –1.35749 0.46294

H –6.41819 –1.43745 0.87737

H –6.67557 0.98145 0.33634

H –5.72461 –1.02675 –1.69431

H –7.70939 0.76019 –2.29441

H –4.98018 0.57457 –3.29476

H –6.36252 2.64071 –1.94578

H –4.02446 2.53032 –1.58952

H –1.68213 2.59640 –1.63059

H 1.44161 –1.38360 –1.41250

H –3.32077 –3.63736 –1.60626

H 6.44619 1.90884 0.78402

H 4.89917 –4.14356 0.53997

H 2.72160 –4.04378 1.26123

H 1.02985 –3.04445 –1.48168

H –0.53751 2.34087 2.41630

H –0.74351 1.60847 0.95791

H 1.34149 1.03890 2.18941

**Structure #70.** Optimized geometry coordinates of G:SAM

Energy: –1711133.4684132 (au)

O 5.64989 4.22679 –0.32661

C 4.61981 4.63840 –1.20941

C 3.47270 3.64633 –1.11668

O 3.84628 2.38405 –1.71123

C 3.01696 3.29900 0.31786

O 2.11786 4.20958 0.89780

C 2.45873 1.88138 0.12608

O 1.08780 1.93702 –0.35024

C 3.38327 1.28205 –0.95041

N 4.49711 0.52314 –0.40974

C 5.79977 0.98058 –0.17739

N 6.60699 0.02396 0.18486

C 5.83290 –1.11734 0.18828

C 6.21585 –2.48110 0.44920

O 7.27942 –2.96699 0.77353

N 5.07878 –3.34140 0.25003

C 3.80321 –2.97841 –0.08458

N 2.89694 –3.96448 –0.22612

N 3.45758 –1.70055 –0.28328

C 4.51960 –0.83934 –0.17440

N 0.66996 –0.98254 –0.18476

C 0.08824 –1.46710 1.11186

C –0.23810 –3.00992 0.94655

O –0.85201 –3.52091 1.88054

O 0.14722 –3.48950 –0.16794

C –1.21443 –0.76876 1.53407

C –1.07625 0.67915 1.99444

S –2.53583 1.37086 2.92022

C –2.68386 0.25543 4.35705

C –4.06131 0.94076 1.96149

C –4.36346 1.94296 0.85158

O –3.30977 1.95591 –0.12445

C –5.68922 1.57424 0.11461

O –6.77156 2.35568 0.53419

C –5.31556 1.77462 –1.37672

O –5.63993 3.09517 –1.79428

C –3.79763 1.54389 –1.42067

N –3.34454 0.20079 –1.72646

C –2.02359 –0.06349 –2.04531

N –1.69634 –1.32685 –1.96717

C –2.87094 –1.96748 –1.58195

C –3.20135 –3.32848 –1.31735

N –2.31654 –4.33364 –1.34605

N –4.49419 –3.61079 –1.02923

C –5.37736 –2.62036 –0.93260

N –5.17322 –1.29850 –1.08108

C –3.90759 –1.04068 –1.42504

H 4.96374 4.67903 –2.25170

H 4.22448 5.62823 –0.93654

H 2.62710 4.07247 –1.68310

H 3.89687 3.25944 0.96469

H 1.25439 4.06602 0.48381

H 2.42931 1.29221 1.04325

H 1.09962 2.27450 –1.25924

H 2.82480 0.59747 –1.60291

H 6.05020 2.02314 –0.31080

H 1.89619 –3.75691 –0.32720

H 0.64422 0.04124 –0.29126

H 1.68541 –1.29172 –0.26853

H 0.85798 –1.34516 1.88075

H –1.93765 –0.83430 0.71772

H –1.57313 –1.41908 2.33767

H –0.93315 1.39237 1.17918

H –0.26414 0.81777 2.71713

H –2.85273 –0.77425 4.04079

H –1.75998 0.33851 4.93206

H –3.51884 0.61998 4.95760

H –3.96354 –0.08086 1.58725

H –4.85871 0.97561 2.71107

H –4.45965 2.94896 1.27650

H –5.92744 0.51780 0.26628

H –6.90090 3.04125 –0.14380

H –5.86663 1.09502 –2.02562

H –5.02237 3.72568 –1.39415

H –3.33638 2.20480 –2.15896

H –1.35556 0.73973 –2.32881

H –1.32748 –4.14152 –1.16556

H –6.39545 –2.91596 –0.69015

H 6.41875 4.79816 –0.44682

H 5.30124 –4.32199 0.37589

H 3.13228 –4.89848 0.07017

H –2.67304 –5.22626 –1.03159

H 0.13175 –1.43288 –0.94958

**Structure #71.** Optimized geometry coordinates of G:SFG (S–edge)

Energy: –1495781.5260297 (au)

O 6.42728 1.67503 –1.96450

C 5.55418 2.20939 –2.95143

C 4.12464 2.12817 –2.44733

O 3.71251 0.75716 –2.37276

C 3.88758 2.69830 –1.04315

O 3.62126 4.09656 –1.13623

C 2.65509 1.89886 –0.57709

O 1.48047 2.47265 –1.12844

C 2.88729 0.53153 –1.24242

N 3.55817 –0.41664 –0.34660

C 4.86690 –0.88620 –0.38629

N 5.11787 –1.77747 0.54045

C 3.92735 –1.91029 1.23163

C 3.57778 –2.73647 2.35784

O 4.22792 –3.55407 2.98892

N 2.20828 –2.49774 2.72587

C 1.32482 –1.62827 2.12985

N 0.05072 –1.58878 2.60358

N 1.66597 –0.88000 1.09318

C 2.94897 –1.07223 0.69617

N –0.94604 0.76494 1.10776

C –0.76219 2.12162 1.62956

C 0.13855 2.05655 2.86010

O 0.01075 1.30173 3.79830

O 1.11717 3.00044 2.82301

C –2.12544 2.70773 2.05580

C –2.97755 3.18515 0.85661

C –4.49496 2.95668 1.00999

N –4.95770 3.60197 2.24779

C –4.91488 1.46993 0.88360

C –4.83652 0.86880 –0.51215

O –3.46815 0.65426 –0.91899

C –5.45604 –0.53458 –0.65497

O –6.85947 –0.55083 –0.69538

C –4.79789 –1.05272 –1.95374

O –5.62917 –0.65219 –3.05074

C –3.45469 –0.27524 –2.00596

N –2.25757 –1.07975 –1.92117

C –1.03367 –0.74139 –2.48108

N –0.05472 –1.54013 –2.14464

C –0.64937 –2.46159 –1.29615

C –0.14565 –3.57913 –0.59397

N 1.14575 –3.97302 –0.67973

N –0.99274 –4.29685 0.16859

C –2.27500 –3.91686 0.23165

N –2.87485 –2.88522 –0.37620

C –2.00936 –2.19202 –1.12724

H 5.62207 1.65214 –3.89597

H 5.77902 3.26695 –3.15918

H 3.47926 2.66938 –3.15441

H 4.75427 2.49447 –0.40711

H 3.82419 4.50139 –0.28291

H 2.57736 1.81349 0.51315

H 1.93891 0.08323 –1.55368

H 5.56412 –0.50301 –1.11561

H –0.49836 –0.78347 2.27027

H –0.11548 0.47103 0.59325

H –0.28491 2.79401 0.90390

H –2.62576 1.91813 2.62922

H –1.97226 3.54327 2.74653

H –2.65030 2.69020 –0.06174

H –2.81252 4.25846 0.71622

H –4.98198 3.49664 0.18559

H –5.97188 3.53970 2.30995

H –4.59986 3.09547 3.05571

H –5.96867 1.38517 1.18032

H –4.34173 0.83957 1.57621

H –5.32850 1.54221 –1.23442

H –5.12285 –1.15975 0.17944

H –7.08754 –0.37981 –1.62452

H –4.65007 –2.13253 –1.93397

H –5.72774 –1.39808 –3.65308

H –3.41007 0.26498 –2.95977

H 7.31213 1.60222 –2.34204

H –2.91391 –4.53072 0.86285

H –0.94372 0.11876 –3.13174

H 1.82634 –3.34342 –1.07538

H 1.46408 –4.67483 –0.02911

H –0.08824 –1.82406 3.57546

H 1.89419 –3.08104 3.49179

H 1.60072 2.90907 3.66251

H –1.73709 0.73742 0.46718

H 1.67049 3.42366 –1.20140

**Structure #72.** Optimized geometry coordinates of G:SFG (W–edge)

Energy: –1184320.9199512 (au)

N –8.31347 0.39473 1.41170

C –8.70546 –0.91206 1.29573

N –7.81714 –1.67413 0.72979

C –6.77813 –0.80475 0.42727

C –5.53930 –1.07111 –0.19605

O –5.11596 –2.15878 –0.61328

N –4.76720 0.08120 –0.31631

C –5.14728 1.33216 0.11408

N –4.26745 2.32377 –0.08968

N –6.30856 1.59260 0.70248

C –7.07301 0.47998 0.82452

N 0.79512 0.79810 –2.53621

C 0.19303 –0.48914 –2.19626

C –1.28269 –0.40094 –1.80164

O –1.84004 –1.38919 –1.45581

O –1.79496 0.84750 –1.39620

C 1.02524 –1.35158 –1.22422

C 1.66782 –2.67181 –1.73339

C 2.08414 –3.68588 –0.63485

N 1.03123 –4.65269 –0.32394

C 2.66020 –2.97939 0.63096

C 3.99705 –2.17513 0.49533

O 4.13911 –1.21226 –0.59090

C 4.48852 –1.41294 1.75764

O 4.89599 –2.18935 2.89179

C 5.43571 –0.29683 1.21801

O 6.81476 –0.42057 1.47061

C 4.96139 –0.12137 –0.22803

N 4.26002 1.17808 –0.43862

C 4.57007 2.13396 –1.44864

N 3.68308 3.22879 –1.32196

C 2.79941 2.95279 –0.21568

C 1.70297 3.71785 0.36143

N 1.33331 5.01975 –0.19512

N 1.01350 3.21733 1.43163

C 1.35858 1.97269 1.97069

N 2.45813 1.20411 1.39169

C 3.15440 1.70019 0.32196

H –9.66405 –1.24496 1.67270

H –3.31285 2.09850 –0.32595

H 1.28358 0.77682 –3.42246

H 1.44774 1.11408 –1.82722

H 0.13525 –1.05567 –3.13864

H –1.16379 1.49975 –1.77041

H 1.81555 –0.72123 –0.81352

H 0.37713 –1.60506 –0.37768

H 2.55253 –2.42256 –2.32787

H 0.96692 –3.19334 –2.39586

H 2.90420 –4.27778 –1.06660

H 1.33247 –5.26562 0.42979

H 0.18988 –4.18038 0.00420

H 2.90707 –3.73871 1.38271

H 1.88928 –2.34245 1.08102

H 4.75488 –2.95243 0.27607

H 3.61223 –0.85636 2.11007

H 5.86198 –2.26306 2.85716

H 5.18659 0.61443 1.76573

H 7.18346 –1.15190 0.95173

H 5.82291 –0.07116 –0.90789

H 2.09248 5.45904 –0.69965

H 0.86250 5.60726 0.48078

H –3.85735 –0.06754 –0.74403

H –4.45878 3.19442 0.37865

H –8.84093 1.16789 1.78712

H 5.35801 2.02056 –2.17556

H 0.82997 1.55683 2.81477

**Structure #73.** Optimized geometry coordinates of U:GLY (W–edge)

Energy: –438803.9211738 (au)

N 2.57510 –1.39191 –0.39669

C 1.23148 –1.05043 –0.27178

O 0.34563 –1.87953 –0.44274

N 1.02015 0.26896 0.05499

C 1.99882 1.26708 0.26430

O 1.67349 2.40792 0.54604

C 3.37229 0.78935 0.11063

C 3.60590 –0.49954 –0.21013

N –2.32001 –1.53789 1.13220

C –3.31205 –0.83687 0.35206

C –2.89819 0.51876 –0.20996

O –1.80253 1.03702 –0.10537

O –3.91225 1.12778 –0.85781

H –3.62411 –1.45403 –0.49966

H –4.22362 –0.67191 0.94060

H 4.17598 1.49686 0.25828

H 4.60298 –0.90601 –0.33840

H 0.04015 0.56109 0.11718

H –3.56602 1.97726 –1.18183

H 2.74795 –2.35874 –0.62923

H –1.49680 –1.74092 0.56510

H –2.00741 –0.95332 1.90287

**Structure #74.** Optimized geometry coordinates of G:D2X (W–edge)

Energy: –1793135.2058358 (au)

N –10.48683 0.53075 0.18844

C –10.74157 –0.78569 0.48670

N –9.66106 –1.46553 0.75578

C –8.62984 –0.53992 0.62503

C –7.22284 –0.68451 0.80030

O –6.57279 –1.69744 1.11926

N –6.56169 0.50725 0.56183

C –7.15271 1.67955 0.19478

N –6.32872 2.70621 –0.01510

N –8.44856 1.83599 0.03889

C –9.12428 0.69207 0.26864

O –3.28043 1.77862 –0.35895

P –3.03133 0.21027 –0.61253

O –4.19070 –0.55546 0.19833

O –3.01046 –0.14325 –2.04892

O –1.64473 –0.13163 0.12936

P –0.44205 –0.82911 –0.68220

O 0.18852 –1.90889 0.33212

O –0.89207 –1.42586 –1.95992

O 0.68588 0.30078 –0.88664

C 1.18427 1.04464 0.22777

C 2.01985 0.14868 1.14335

C 3.23466 –0.42191 0.40924

C 4.31137 0.22267 –0.18846

C 4.46342 1.74555 –0.19369

S 3.49327 –2.12700 0.16375

C 4.99738 –1.89291 –0.68615

N 5.22048 –0.57802 –0.74811

C 6.40607 –0.03573 –1.42268

C 7.53650 0.18412 –0.41480

C 7.32705 –0.15430 0.91686

N 8.26175 0.02398 1.83377

C 9.45842 0.54345 1.52765

C 10.51398 0.73849 2.61891

N 9.74777 0.90990 0.21022

C 8.76698 0.72151 –0.77011

O 8.98715 1.01099 –1.94477

H –11.74757 –1.18307 0.48828

H –6.79031 3.51818 –0.40182

H –0.22546 –2.76981 0.15391

H 0.35798 1.48433 0.79746

H 1.76794 1.85871 –0.19953

H 1.42696 –0.65684 1.56898

H 2.38811 0.75432 1.98185

H 3.84042 2.17685 0.58872

H 5.49401 2.04378 0.00953

H 4.15816 2.17162 –1.15525

H 5.63596 –2.65914 –1.09880

H 6.69334 –0.74661 –2.20334

H 6.11766 0.88401 –1.93559

H 6.39644 –0.58213 1.27547

H 10.09221 1.34099 3.42749

H 11.39629 1.22498 2.20469

H 10.78645 –0.23506 3.03633

H –5.42375 2.51212 –0.42363

H –5.56554 0.46627 0.71259

H –4.62079 –1.35819 –0.14822

H –3.16692 2.10059 0.55061

H 9.88936 1.36710 –2.04962

H –11.14954 1.25063 –0.05831

**Structure #75.** Optimized geometry coordinates of G:G6P (W–edge)

Energy: –1439336.4093151 (au)

O –2.73018 2.52943 –0.83197

C –3.94538 1.96366 –0.39489

C –4.28086 0.77051 –1.29262

O –3.31037 –0.29637 –1.22068

C –5.59345 0.05767 –0.97183

O –6.08879 –0.66612 –2.10175

C –5.18513 –0.95639 0.13070

O –5.99419 –2.10262 0.14063

C –3.69810 –1.24829 –0.22861

N –2.77195 –1.20599 0.90102

C –2.77829 –0.36491 2.01490

N –1.62756 –0.28781 2.62459

C –0.79663 –1.10938 1.88595

C 0.61538 –1.29095 1.96539

O 1.43450 –0.72564 2.70289

N 1.07038 –2.19706 0.98238

C 0.29263 –2.74562 –0.01402

N 0.91508 –3.58917 –0.88386

N –0.99938 –2.51036 –0.13834

C –1.48176 –1.68847 0.81799

C 0.58823 2.76316 –1.05410

C 0.26961 2.41070 0.42370

C 1.57292 2.35532 1.24045

C 2.50577 1.36819 0.52161

C 2.83440 1.88562 –0.87778

C 3.80210 1.01753 –1.67347

O 0.84904 4.15904 –1.16833

O –0.68208 3.34402 0.92460

O 1.45958 2.04105 2.60791

O 3.68866 1.14808 1.29629

O 1.60689 1.96070 –1.61211

O 3.46317 –0.38439 –1.57905

P 4.48360 –1.40048 –0.84156

O 4.00378 –1.45303 0.68372

O 3.89208 –2.83129 –1.33231

O 5.91465 –1.17767 –1.13114

H –4.77736 2.68465 –0.47691

H –3.89269 1.65332 0.65616

H –4.26877 1.12622 –2.32866

H –6.40157 0.72057 –0.65377

H –5.31936 –0.97413 –2.60491

H –5.26499 –0.49010 1.11684

H –6.36158 –2.15850 –0.75923

H –3.59715 –2.24582 –0.66057

H –3.67588 0.13428 2.34730

H 0.36033 –3.81500 –1.69639

H –0.29850 2.58991 –1.66545

H –0.21778 1.43173 0.45291

H 2.04042 3.35207 1.22744

H 1.97838 0.41765 0.38835

H 3.30851 2.88025 –0.80663

H 3.73475 1.29425 –2.72826

H 4.82638 1.18108 –1.32893

H 1.70532 4.35974 –0.76486

H –0.41808 4.20709 0.56266

H 1.14544 1.11786 2.72753

H 3.39814 1.28408 2.21987

H –2.23027 2.88388 –0.07294

H 3.96432 –0.54168 1.09094

H 2.08299 –2.31249 0.96298

H 1.91118 –3.47981 –1.04120

H 4.52542 –3.25278 –1.93129

**Structure #76.** Optimized geometry coordinates of G:PYI (W–edge)

Energy: –1579476.8320853 (au)

N 5.14839 4.59323 –0.09720

C 4.23912 4.60455 –1.14610

N 3.85529 3.41067 –1.50863

C 4.54626 2.56055 –0.66141

C 4.58071 1.15213 –0.57763

O 3.96877 0.30915 –1.30097

N 5.41578 0.69437 0.43766

C 6.15153 1.49686 1.28107

N 6.89359 0.85615 2.20966

N 6.16112 2.81704 1.20372

C 5.35858 3.28364 0.23243

C –9.04506 3.22370 0.10959

C –8.15197 2.01810 0.09838

N –7.22809 1.94389 –0.87862

C –6.44395 0.86607 –0.86155

C –6.53818 –0.15345 0.08295

C –5.61668 –1.34955 0.12876

N –4.26926 –1.07624 –0.45666

C –4.05162 –1.50238 –1.72700

C –2.84914 –1.26772 –2.35580

C –1.85828 –0.58108 –1.65919

C –2.07516 –0.13747 –0.34795

C –0.93607 0.55725 0.36902

C –0.10395 –0.40132 1.24379

O 0.17341 –1.63397 0.55891

P 1.43838 –1.85930 –0.40691

O 1.36547 –3.17319 –1.08188

O 1.48192 –0.52475 –1.27496

O 2.72441 –1.72788 0.58292

P 4.15121 –2.53353 0.28146

O 3.78264 –4.06834 0.36945

O 5.16132 –2.03480 1.24900

O 4.43946 –2.25933 –1.25119

C –3.31402 –0.40133 0.26045

C –3.64359 –0.00491 1.67077

C –7.57726 0.00024 1.03449

N –7.80417 –0.91673 2.03142

N –8.35505 1.09034 1.04130

H 3.90797 5.53265 –1.59153

H 6.79807 –0.13723 2.36047

H –9.47381 3.37690 1.10048

H –9.86836 3.07638 –0.59950

H –8.49333 4.10868 –0.21288

H –5.68285 0.82703 –1.64086

H –6.01174 –2.20890 –0.42246

H –5.46956 –1.67817 1.16000

H –4.87015 –2.02800 –2.20174

H –2.69279 –1.62217 –3.36744

H –0.89641 –0.39109 –2.12540

H –1.29184 1.37844 0.99867

H –0.28056 0.99545 –0.38487

H –0.65225 –0.69590 2.14207

H 0.82149 0.09037 1.55747

H –4.60410 0.51280 1.72892

H –3.69514 –0.88540 2.32220

H –2.87984 0.65519 2.07465

H –8.62829 –0.71559 2.58424

H –7.66193 –1.89791 1.84342

H 2.39124 –0.10490 –1.37804

H 3.03083 –4.27488 –0.22495

H 4.42552 –1.27430 –1.43502

H 7.38711 1.41618 2.88573

H 5.42292 –0.31829 0.62972

H 5.59397 5.38765 0.33913

**Structure #77.** Optimized geometry coordinates of G:RS3 (W–edge)

Energy: –1234629.1230812 (au)

N –8.40125 0.87517 –1.06339

C –7.82052 1.91917 –1.76725

N –6.51851 1.94065 –1.66543

C –6.21780 0.85957 –0.85738

C –4.96075 0.37459 –0.37459

O –3.82311 0.82442 –0.56421

N –5.14370 –0.78035 0.41809

C –6.34678 –1.35855 0.73964

N –6.27386 –2.48353 1.50954

N –7.51096 –0.90970 0.31981

C –7.38018 0.18166 –0.47071

O 5.08870 4.76745 0.11485

C 4.04430 4.15600 0.24627

N 2.83101 4.78088 0.47246

C 1.55823 4.18464 0.61906

O 0.58281 4.89489 0.77885

C 3.91783 2.66699 0.18735

C 2.58989 2.10704 0.39497

N 1.49122 2.80118 0.57308

N 4.98358 1.95532 –0.05354

C 4.85456 0.60040 –0.11595

C 5.99606 –0.18067 –0.39879

C 5.96266 –1.55805 –0.47701

C 7.24749 –2.32664 –0.67261

C 4.69974 –2.21114 –0.27778

N 4.62357 –3.61305 –0.32562

C 3.51536 –4.26463 0.36396

C 4.94093 –4.27166 –1.59430

C 3.55995 –1.45488 0.02907

C 3.61704 –0.05748 0.12119

N 2.51023 0.72677 0.42202

C 1.22014 0.10942 0.77317

C 0.34590 –0.18138 –0.45824

O 0.10908 0.98397 –1.21672

C –0.98938 –0.84137 –0.05555

O –1.70880 –0.01439 0.86430

C –0.84324 –2.23821 0.58049

O –0.02384 –3.10087 –0.20877

C –2.20251 –2.90236 0.85045

O –3.00026 –2.14998 1.77459

H –8.41933 2.62172 –2.33042

H –5.42565 –2.65206 2.03349

H 6.93023 0.35833 –0.52222

H 8.09566 –1.73751 –0.31492

H 7.22416 –3.27154 –0.12269

H 7.44516 –2.56241 –1.72540

H 3.74790 –5.32995 0.45537

H 3.40892 –3.85143 1.36956

H 2.54828 –4.17205 –0.15526

H 5.75898 –3.76881 –2.10555

H 5.23700 –5.30862 –1.40657

H 4.07226 –4.27815 –2.27252

H 2.61498 –1.96643 0.13745

H 1.43249 –0.80002 1.33679

H 0.69457 0.80709 1.42509

H 0.87096 –0.88121 –1.11923

H 0.05446 1.74064 –0.60612

H –1.57092 –0.93741 –0.98574

H –2.42352 0.44913 0.35427

H –0.32448 –2.14256 1.54136

H –0.40695 –3.14882 –1.09657

H –2.03368 –3.90147 1.26513

H –2.74354 –3.02166 –0.10268

H –2.59059 –1.25402 1.79455

H 2.84320 5.79309 0.51438

H –7.14468 –2.79105 1.91356

H –4.30294 –1.21767 0.80602

H –9.38234 0.65284 –0.98623

**Structure #78.** Optimized geometry coordinates of G:RS3 (S–edge)

Energy: –1545960.0516360 (au)

O 5.30881 4.23024 1.61122

C 4.37805 4.51788 0.58779

C 3.53437 3.29473 0.32651

O 4.32469 2.33263 –0.40233

C 3.09310 2.58394 1.59125

O 1.81339 3.05522 1.94054

C 3.03999 1.11435 1.19448

O 1.74203 0.74694 0.75201

C 4.04468 1.02111 0.04590

N 5.31276 0.35347 0.36127

C 6.39055 0.86408 1.04182

N 7.38507 0.02657 1.14950

C 6.94127 –1.10671 0.48630

C 7.58123 –2.34777 0.26671

O 8.70991 –2.69383 0.63890

N 6.78275 –3.23936 –0.44434

C 5.51547 –2.95625 –0.89281

N 4.87959 –3.91574 –1.57348

N 4.90742 –1.79560 –0.70305

C 5.67285 –0.92216 –0.00289

O –8.62790 –0.78503 1.00908

C –7.49797 –1.33314 1.02338

N –7.36248 –2.62891 1.40219

C –6.14404 –3.22649 1.41717

O –6.05488 –4.42927 1.76902

C –6.37125 –0.61084 0.64699

C –5.11502 –1.22486 0.66340

N –5.03094 –2.53086 1.04944

N –6.49479 0.68124 0.27317

C –5.40090 1.38179 –0.09001

C –5.53732 2.71125 –0.47397

C –4.42829 3.46044 –0.85123

C –4.64832 4.89514 –1.25695

C –3.15752 2.87132 –0.84485

N –2.02284 3.54476 –1.20280

C –0.74222 2.86403 –1.17044

C –2.03758 4.93523 –1.62615

C –3.03603 1.53138 –0.45712

C –4.14558 0.77593 –0.07922

N –4.01663 –0.51899 0.29033

C –2.68210 –1.14890 0.31163

C –2.38811 –1.83456 –1.02113

O –3.41611 –2.79613 –1.26232

C –1.03564 –2.55247 –1.05261

O –0.93222 –3.44560 0.05026

C 0.18066 –1.63665 –1.00566

O –0.15678 –0.34106 –1.49145

C 1.30640 –2.19773 –1.86361

O 1.97774 –3.23632 –1.14280

H 3.71315 5.34482 0.88444

H 4.87261 4.80492 –0.34869

H 2.64882 3.57595 –0.26121

H 3.82338 2.74472 2.38692

H 1.74455 3.12886 2.90082

H 3.34162 0.45108 2.01512

H 1.14614 1.36700 1.21021

H 3.60201 0.42158 –0.75730

H 6.37789 1.87990 1.41332

H 3.86839 –3.78870 –1.62564

H –6.53210 3.14052 –0.46905

H –5.72335 5.09329 –1.17129

H –4.17736 5.62639 –0.60535

H –4.40803 5.11283 –2.29412

H 0.03591 3.55335 –1.49538

H –0.48558 2.52769 –0.15726

H –0.72887 1.99537 –1.83718

H –2.58813 5.10416 –2.54723

H –2.35752 5.62491 –0.85001

H –1.00314 5.20767 –1.85084

H –2.07441 1.05690 –0.53959

H –1.94188 –0.40339 0.59360

H –2.73025 –1.90990 1.09430

H –2.42565 –1.11136 –1.84094

H –3.70162 –3.17989 –0.41302

H –1.04520 –3.18064 –1.94719

H –0.73521 –2.93595 0.84608

H 0.55063 –1.55635 0.02568

H 0.55580 0.23805 –1.17754

H 2.06798 –1.43385 –2.04337

H 0.92424 –2.54024 –2.83533

H 1.30251 –3.85460 –0.82155

H 6.09875 4.76798 1.48443

H 7.21771 –4.13400 –0.63121

H 5.19724 –4.86870 –1.48453

H –8.18422 –3.15317 1.66911

**Structure #79.** Optimized geometry coordinates of A:PRF (S–edge)

Energy: –994406.4016346 (au)

O –5.48211 –2.28623 0.29498

C –5.02106 –3.03025 –0.83108

C –3.60139 –2.63028 –1.16380

O –3.54557 –1.17351 –1.33105

C –2.57403 –2.96798 –0.07303

O –1.29771 –3.20720 –0.67675

C –2.50505 –1.65464 0.70397

O –1.34822 –1.46660 1.48240

C –2.58760 –0.64315 –0.43296

N –2.94801 0.69666 0.02685

C –3.96866 1.08907 0.86705

N –3.97076 2.38163 1.11902

C –2.85857 2.87187 0.44733

C –2.27576 4.14956 0.33001

N –2.70626 5.28255 0.90580

N –1.17758 4.24683 –0.44521

C –0.67219 3.15397 –1.02572

N –1.12684 1.90989 –0.97071

C –2.22597 1.83570 –0.21972

N 6.26487 –0.48730 0.17408

C 6.23391 0.78380 –0.42220

N 5.03011 1.39088 –0.69895

C 3.79192 0.77187 –0.38815

C 3.78874 –0.51981 0.24302

C 5.07030 –1.12444 0.52609

O 5.05548 –2.35696 1.11721

C 2.41697 –0.92518 0.44649

C 1.91827 –2.19980 1.09869

N 2.04628 –3.37626 0.24160

C 1.65575 0.13626 –0.04556

N 2.47684 1.13084 –0.54513

N 7.47558 1.44416 –0.75329

H –5.67271 –2.87567 –1.70210

H –5.06178 –4.09022 –0.56336

H –3.29950 –3.10065 –2.10954

H –2.82030 –3.84193 0.53081

H –1.23116 –2.68967 –1.48946

H –3.38117 –1.56710 1.35022

H –0.65897 –1.97920 1.02940

H –1.61454 –0.51212 –0.91997

H –4.69660 0.38942 1.25234

H –2.18358 6.12693 0.74047

H 0.21252 3.32423 –1.63897

H 2.51976 –2.38782 1.99172

H 0.89509 –2.07385 1.44553

H 0.58755 0.28683 –0.04882

H 2.14925 1.99539 –0.94830

H 7.11753 –1.00623 0.34404

H –3.51428 5.28739 1.50554

H –5.58603 –1.37954 –0.02503

H 3.04474 –3.54350 0.12230

H 1.66706 –3.17173 –0.67953

H 7.26258 2.39605 –1.03041

H 8.14647 1.41852 0.00779

**Structure #80.** Optimized geometry coordinates of U:AMZ (W–edge)

Energy: –854276.0121636 (au)

N –5.33677 –0.73941 0.27121

C –4.24560 0.11715 0.13949

O –4.37304 1.33401 0.19965

N –3.04699 –0.52558 –0.05789

C –2.83463 –1.90368 –0.11531

O –1.70041 –2.35359 –0.28356

C –4.03535 –2.71410 0.03589

C –5.22851 –2.10711 0.22007

O –0.16649 4.57769 0.35828

C –0.81862 3.53028 0.20023

N –2.16667 3.48837 0.33041

C –0.13195 2.27597 –0.13092

C 1.24499 2.15928 –0.26076

N 2.20533 3.14910 –0.26772

N –0.72159 1.04138 –0.35992

C 0.25395 0.20589 –0.61125

N 1.48461 0.82592 –0.54008

C 2.76575 0.19083 –0.89102

C 3.79799 0.17225 0.24607

C 3.40063 –1.08379 1.05418

O 4.47815 –1.63042 1.77389

O 5.11170 0.00967 –0.28443

O 2.55921 –1.16468 –1.19977

C 2.80406 –2.01232 –0.03534

C 1.54222 –2.72959 0.43953

O 0.93574 –3.43829 –0.61679

H –3.94059 –3.78996 –0.00469

H –6.15672 –2.65506 0.33762

H –2.73021 2.65541 0.19967

H 1.75525 4.02572 0.00465

H 0.14450 –0.83537 –0.86267

H 3.16441 0.70294 –1.77456

H 3.82512 1.07384 0.86087

H 2.62382 –0.82273 1.78233

H 5.27425 –1.40434 1.26446

H 5.05404 –0.59998 –1.03615

H 3.54401 –2.75632 –0.34991

H 0.85022 –2.00086 0.88068

H 1.85743 –3.40424 1.25428

H –2.62809 4.35714 0.54963

H 3.05454 2.96104 0.25028

H –0.02150 –3.29131 –0.55881

H –6.22651 –0.28403 0.41502

H –2.21790 0.10826 –0.16799
